# Supplementary material for: Oxygen-Free Csp3-H Oxidation of Pyridin-2-yl-methanes to Pyridin-2-yl-methanones with Water by Copper Catalysis
Source: MDPI journal article supplement (doi:10.3390/molecules28227587), 2023-11-14
Supplement: s1 [file s1]

# Supporting information

## Oxygen Free Csp<sup>3</sup>-H Oxidation of Pyridin-2-yl-methanes to Pyridin-2-yl-methanones with Water by Copper Catalysis

Ming Zeng <sup>1</sup>, Jia-Le Chen <sup>1</sup>, Xue Luo <sup>2</sup>, Yan-Jiao Zou <sup>1</sup>, Zhao-Ning Liu <sup>2</sup> Jun Dai <sup>3</sup>,

Deng-Zhao Jiang <sup>1,4</sup> and Jin-Jing Li <sup>2,\*</sup>

<sup>1</sup> School of Pharmacy and Life Science, Jiujiang University, Jiujiang 332005, China; zengming@zjut.edu.cn (M.Z.)

<sup>2</sup> College of Pharmacy, Jiamusi University, Jiujiang 332005, China; m15244643141@163.com (X.L.)

<sup>3</sup> Analytical and Testing Center, Jiujiang University, Jiujiang 332005, China

<sup>4</sup> Jiujiang Key Laboratory for the Development and Utilization of Traditional Chinese Medicine Resources in Northwest Jiangxi, Jiujiang 332005, China

\* Correspondence: lijingjing@jmsu.edu.cn

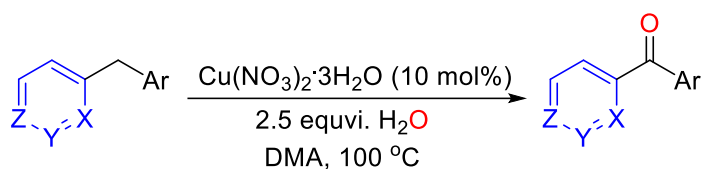

2-pyridyl  
3-pyridyl  
4-pyridyl

Ar = Benzyl, thiophenyl,  
thiazolyl, pyridyl, triazine

16 examples

Yield up to 92%

- O<sub>2</sub> free
- H<sub>2</sub>O as oxygen source
- Mild conditions

We describe an efficient copper catalyzed synthesis of pyridin-2-yl-methanones from pyridin-2-yl-methanes by direct Csp<sup>3</sup>-H oxidation approach with water under mild conditions. Pyridin-2-yl-methanes with aromatic rings such as substituted benzene, thiophene, thiazole, pyridine, triazine, undergo the reaction well to obtain the corresponding products in moderate to good yields. Several controlled experiments are operated for the mechanism exploration, indicating that water participates in the oxidation process and it is the single oxygen source in this transformation. The current work provides a new sight for water involved oxidation reactions.

# Contents

| Figures | NMR spectra                              | Pages |
|---------|------------------------------------------|-------|
| 1       | <sup>1</sup> H NMR spectra of <b>2a</b>  | S1    |
| 2       | <sup>13</sup> C NMR spectra of <b>2a</b> | S2    |
| 3       | <sup>1</sup> H NMR spectra of <b>2b</b>  | S3    |
| 4       | <sup>13</sup> C NMR spectra of <b>2b</b> | S4    |
| 5       | <sup>1</sup> H NMR spectra of <b>2c</b>  | S5    |
| 6       | <sup>13</sup> C NMR spectra of <b>2c</b> | S6    |
| 7       | <sup>1</sup> H NMR spectra of <b>2d</b>  | S7    |
| 8       | <sup>13</sup> C NMR spectra of <b>2d</b> | S8    |
| 9       | <sup>1</sup> H NMR spectra of <b>2e</b>  | S9    |
| 10      | <sup>13</sup> C NMR spectra of <b>2e</b> | S10   |
| 11      | <sup>19</sup> F NMR spectra of <b>2e</b> | S11   |
| 12      | <sup>1</sup> H NMR spectra of <b>2f</b>  | S12   |
| 13      | <sup>13</sup> C NMR spectra of <b>2f</b> | S13   |
| 14      | <sup>1</sup> H NMR spectra of <b>2g</b>  | S14   |
| 15      | <sup>13</sup> C NMR spectra of <b>2g</b> | S15   |
| 16      | <sup>1</sup> H NMR spectra of <b>2h</b>  | S16   |
| 17      | <sup>13</sup> C NMR spectra of <b>2h</b> | S17   |
| 18      | <sup>1</sup> H NMR spectra of <b>2i</b>  | S18   |
| 19      | <sup>13</sup> C NMR spectra of <b>2i</b> | S19   |
| 20      | <sup>1</sup> H NMR spectra of <b>2j</b>  | S20   |
| 21      | <sup>13</sup> C NMR spectra of <b>2j</b> | S21   |
| 22      | <sup>1</sup> H NMR spectra of <b>2k</b>  | S22   |
| 23      | <sup>13</sup> C NMR spectra of <b>2k</b> | S23   |
| 24      | <sup>1</sup> H NMR spectra of <b>2l</b>  | S24   |
| 25      | <sup>13</sup> C NMR spectra of <b>2l</b> | S25   |
| 26      | <sup>1</sup> H NMR spectra of <b>2m</b>  | S26   |
| 27      | <sup>13</sup> C NMR spectra of <b>2m</b> | S27   |
| 28      | <sup>1</sup> H NMR spectra of <b>2n</b>  | S28   |
| 29      | <sup>13</sup> C NMR spectra of <b>2n</b> | S29   |
| 30      | <sup>1</sup> H NMR spectra of <b>2o</b>  | S30   |
| 31      | <sup>13</sup> C NMR spectra of <b>2o</b> | S31   |
| 32      | <sup>1</sup> H NMR spectra of <b>2p</b>  | S32   |
| 33      | <sup>13</sup> C NMR spectra of <b>2p</b> | S33   |
| 34      | <sup>1</sup> H NMR spectra of <b>2r</b>  | S34   |
| 35      | <sup>13</sup> C NMR spectra of <b>2r</b> | S35   |

8.7121 8.7103 8.7081 8.7001 8.6984 8.6962  
8.0588 8.0570 8.0392 8.0358 8.0300 8.0102  
7.5949 7.5926 7.5896 7.5792 7.5783 7.5739 7.5696 7.5579 7.5557 7.5525 7.4870 7.4835 7.4813 7.4782 7.4674 7.4627 7.4592 7.4491 7.4474 7.2502

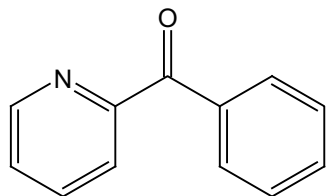

Figure S1.  $^1\text{H}$  spectrum of **2a** in  $\text{CDCl}_3$

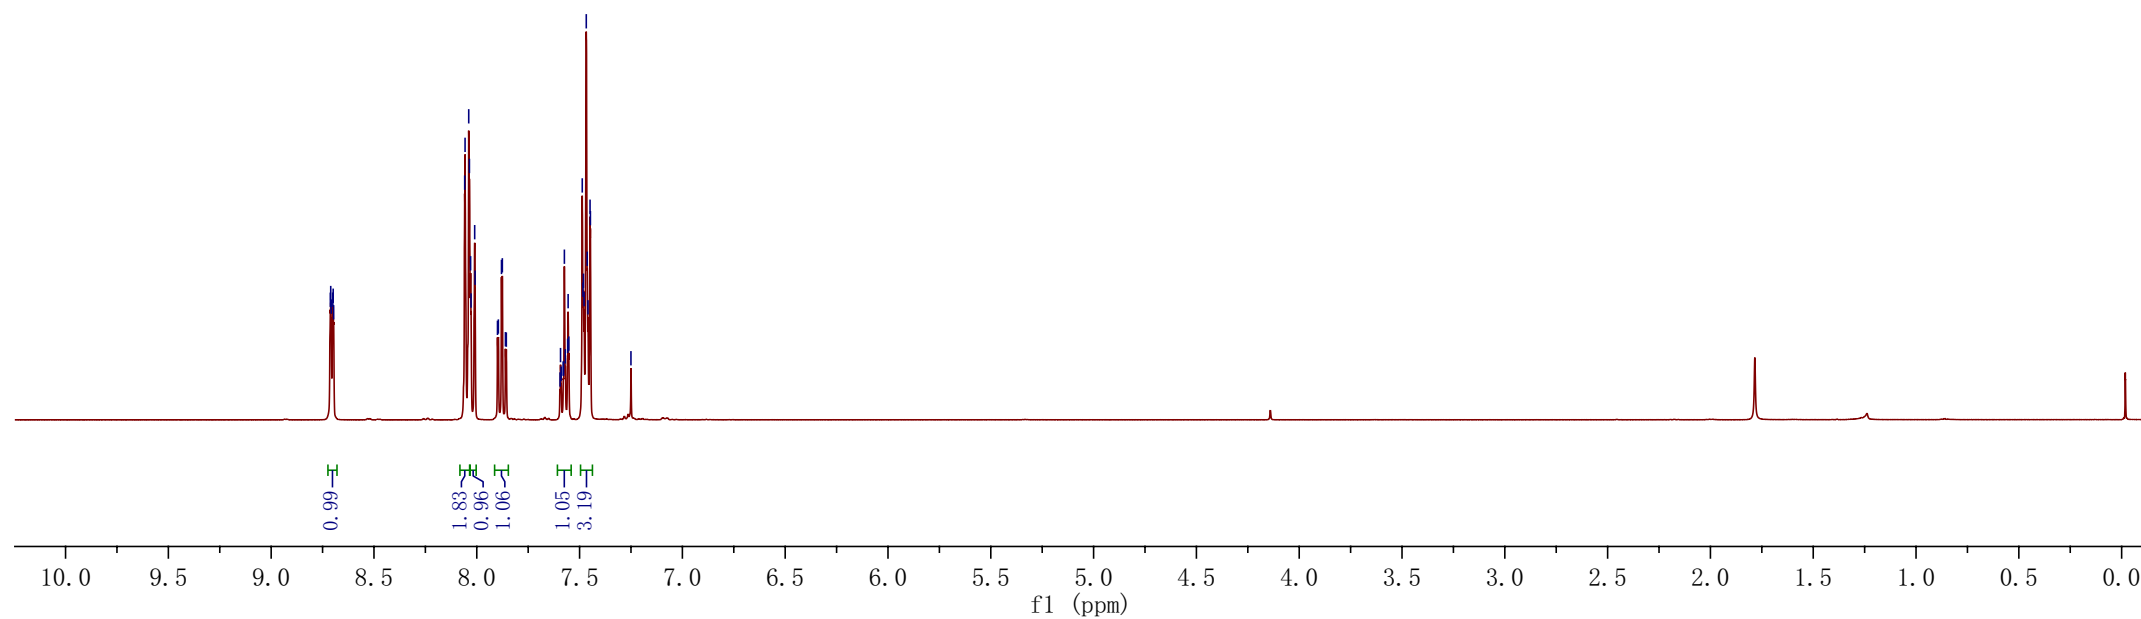

193.8876

155.1326

148.5673

137.0542

136.2912

132.9260

130.9929

128.1718

126.1595

124.6247

2

77.3729

77.0553

76.7376

S2

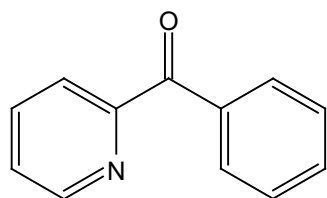

Figure S2.  $^{13}\text{C}$  spectrum of **2a** in  $\text{CDCl}_3$

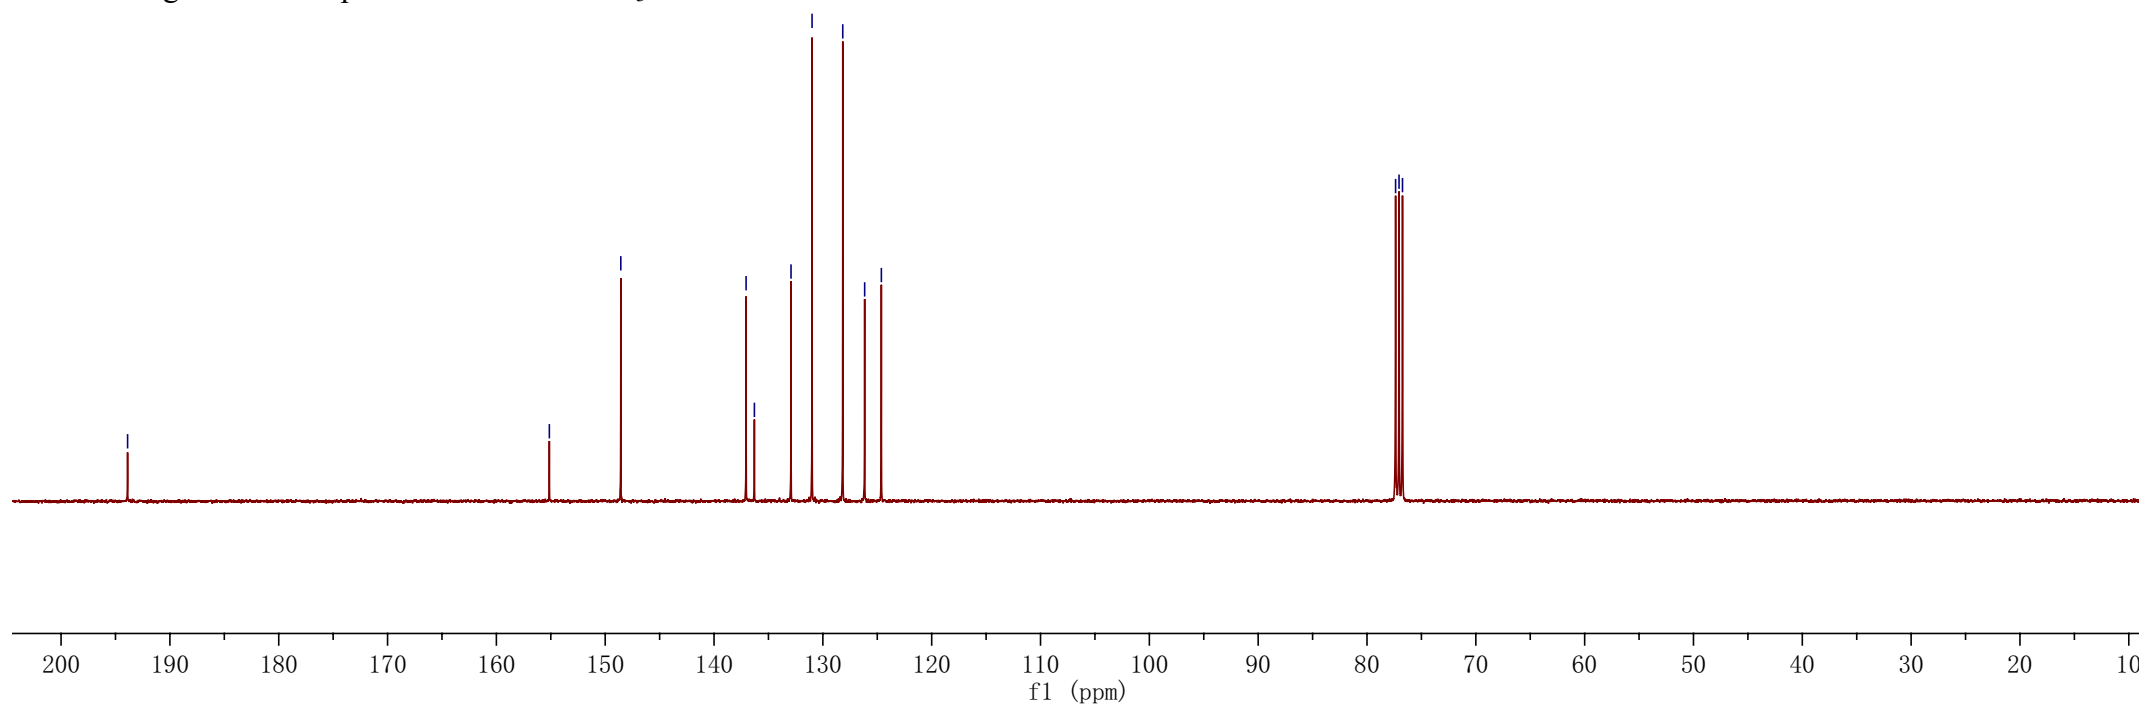



8.7501  
8.7485  
8.7466  
8.7382  
8.7367  
8.0539  
8.0482  
8.0434  
8.0347  
8.0318  
8.0266  
7.9082  
7.5364  
7.5318  
7.5196  
7.5149  
7.5104  
7.4984  
7.4956  
7.4917  
7.4888  
7.4795  
7.4768  
7.2817

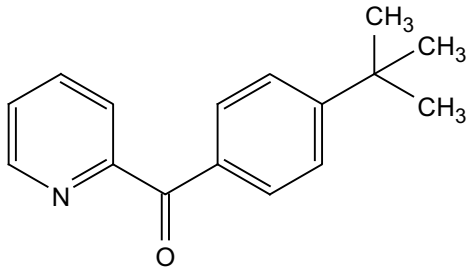

Figure S3. <sup>1</sup>H spectrum of **2b** in CDCl<sub>3</sub>

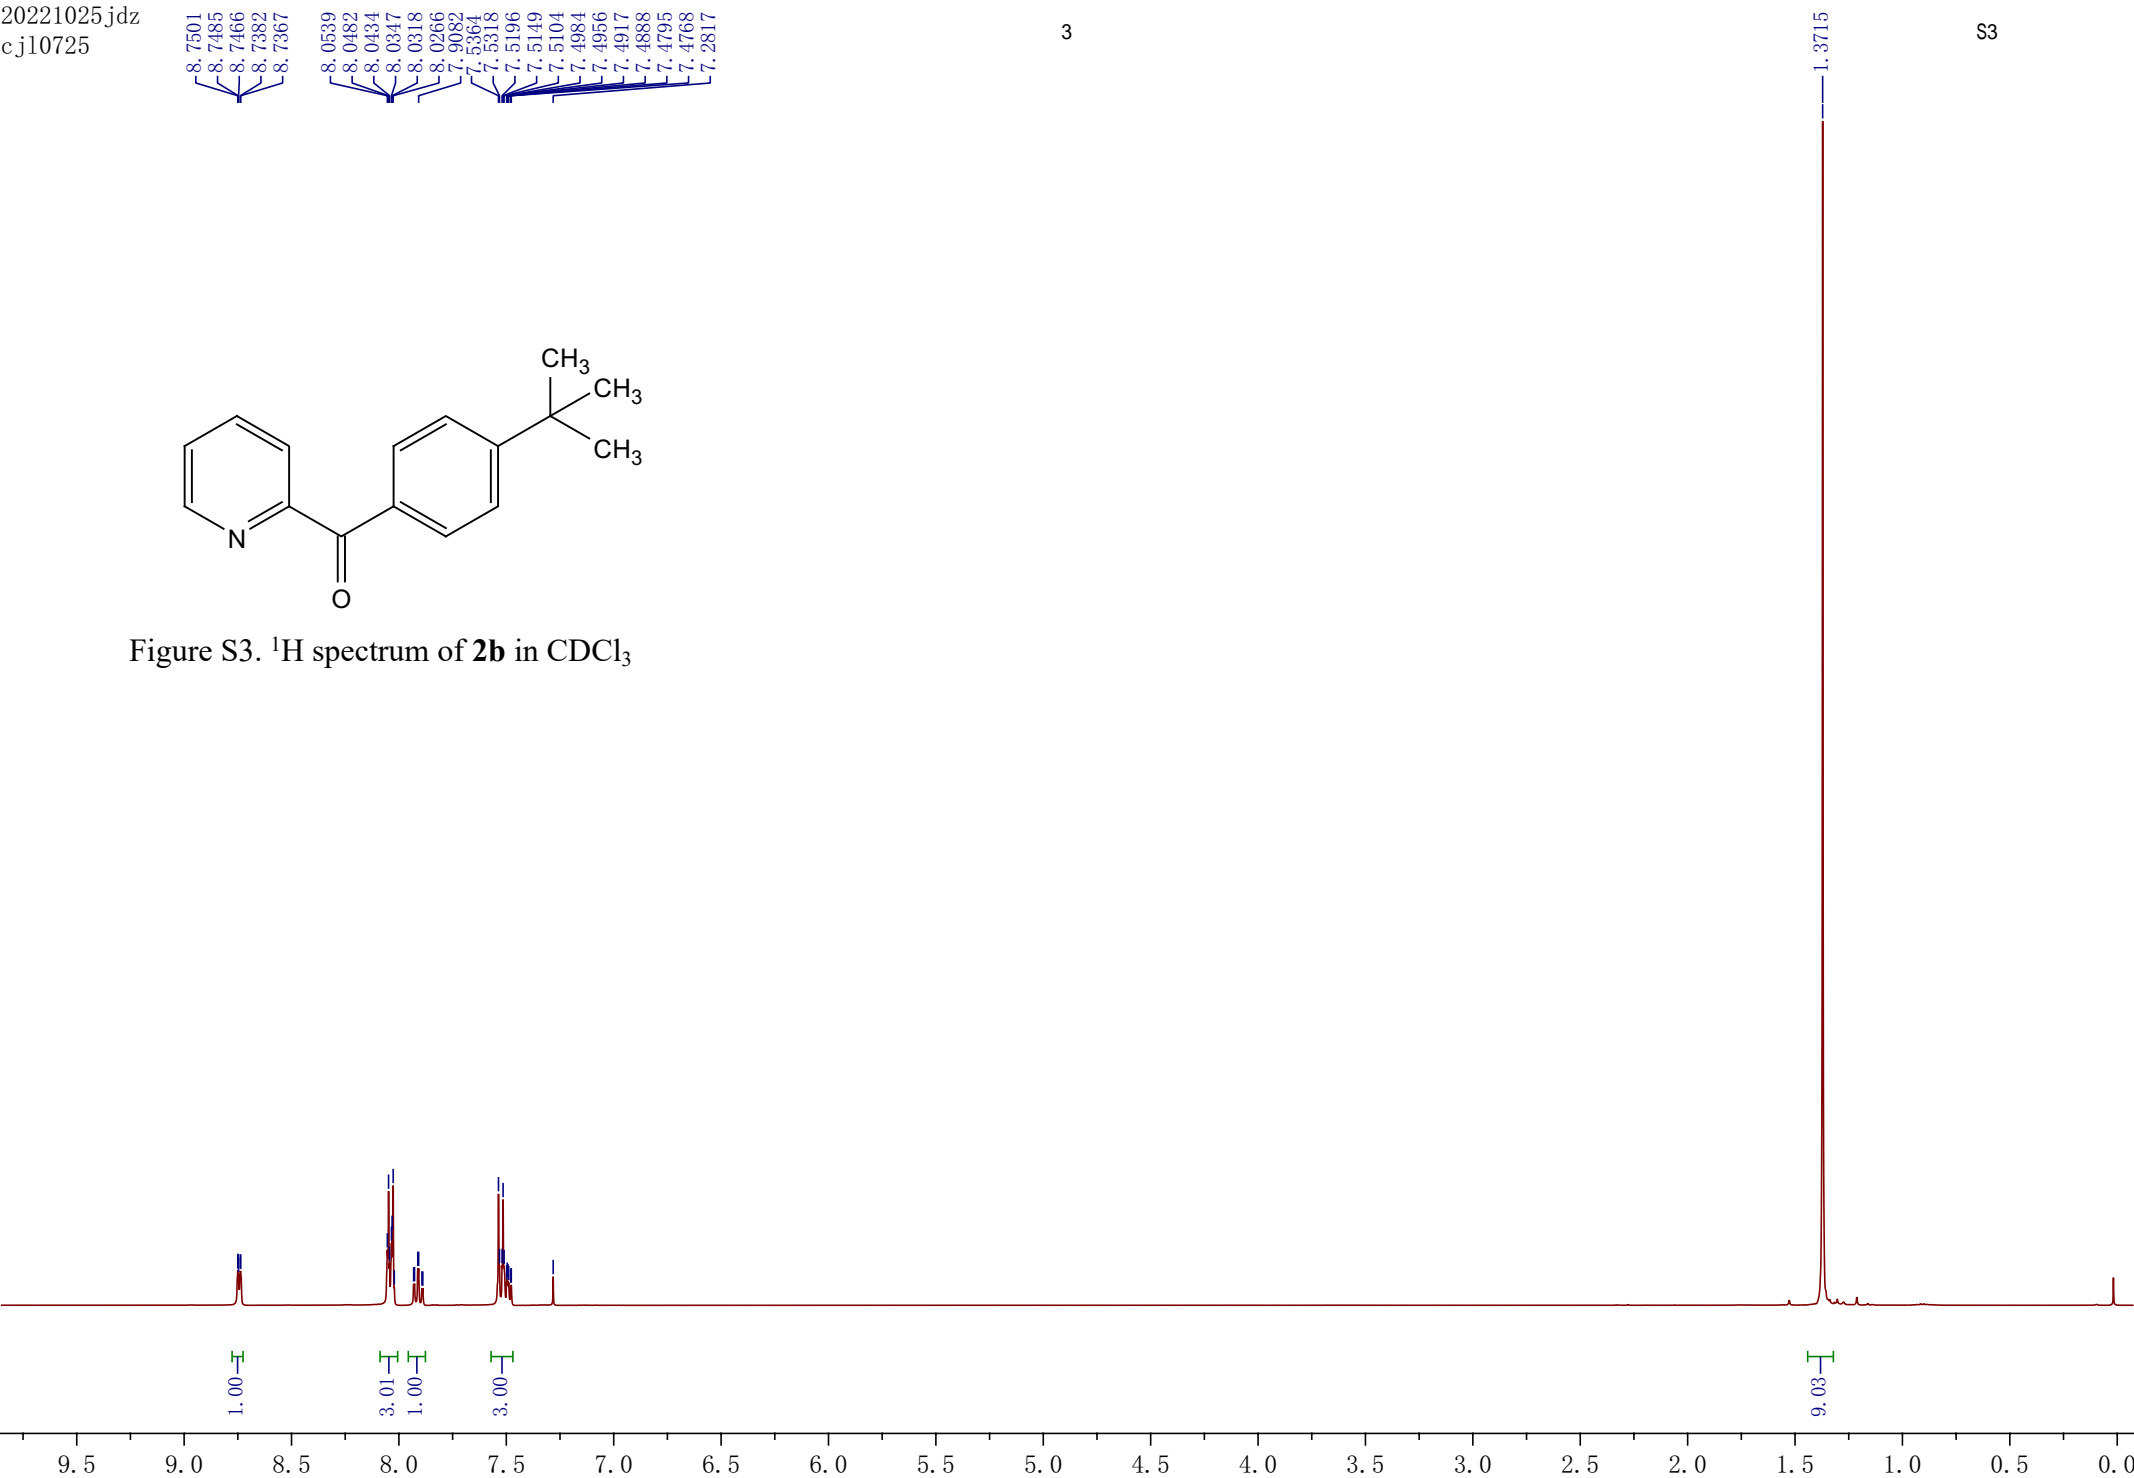

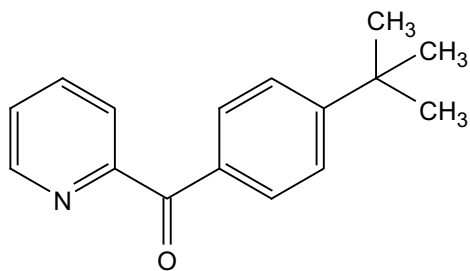

Figure S4. <sup>13</sup>C spectrum of **2b** in CDCl<sub>3</sub>

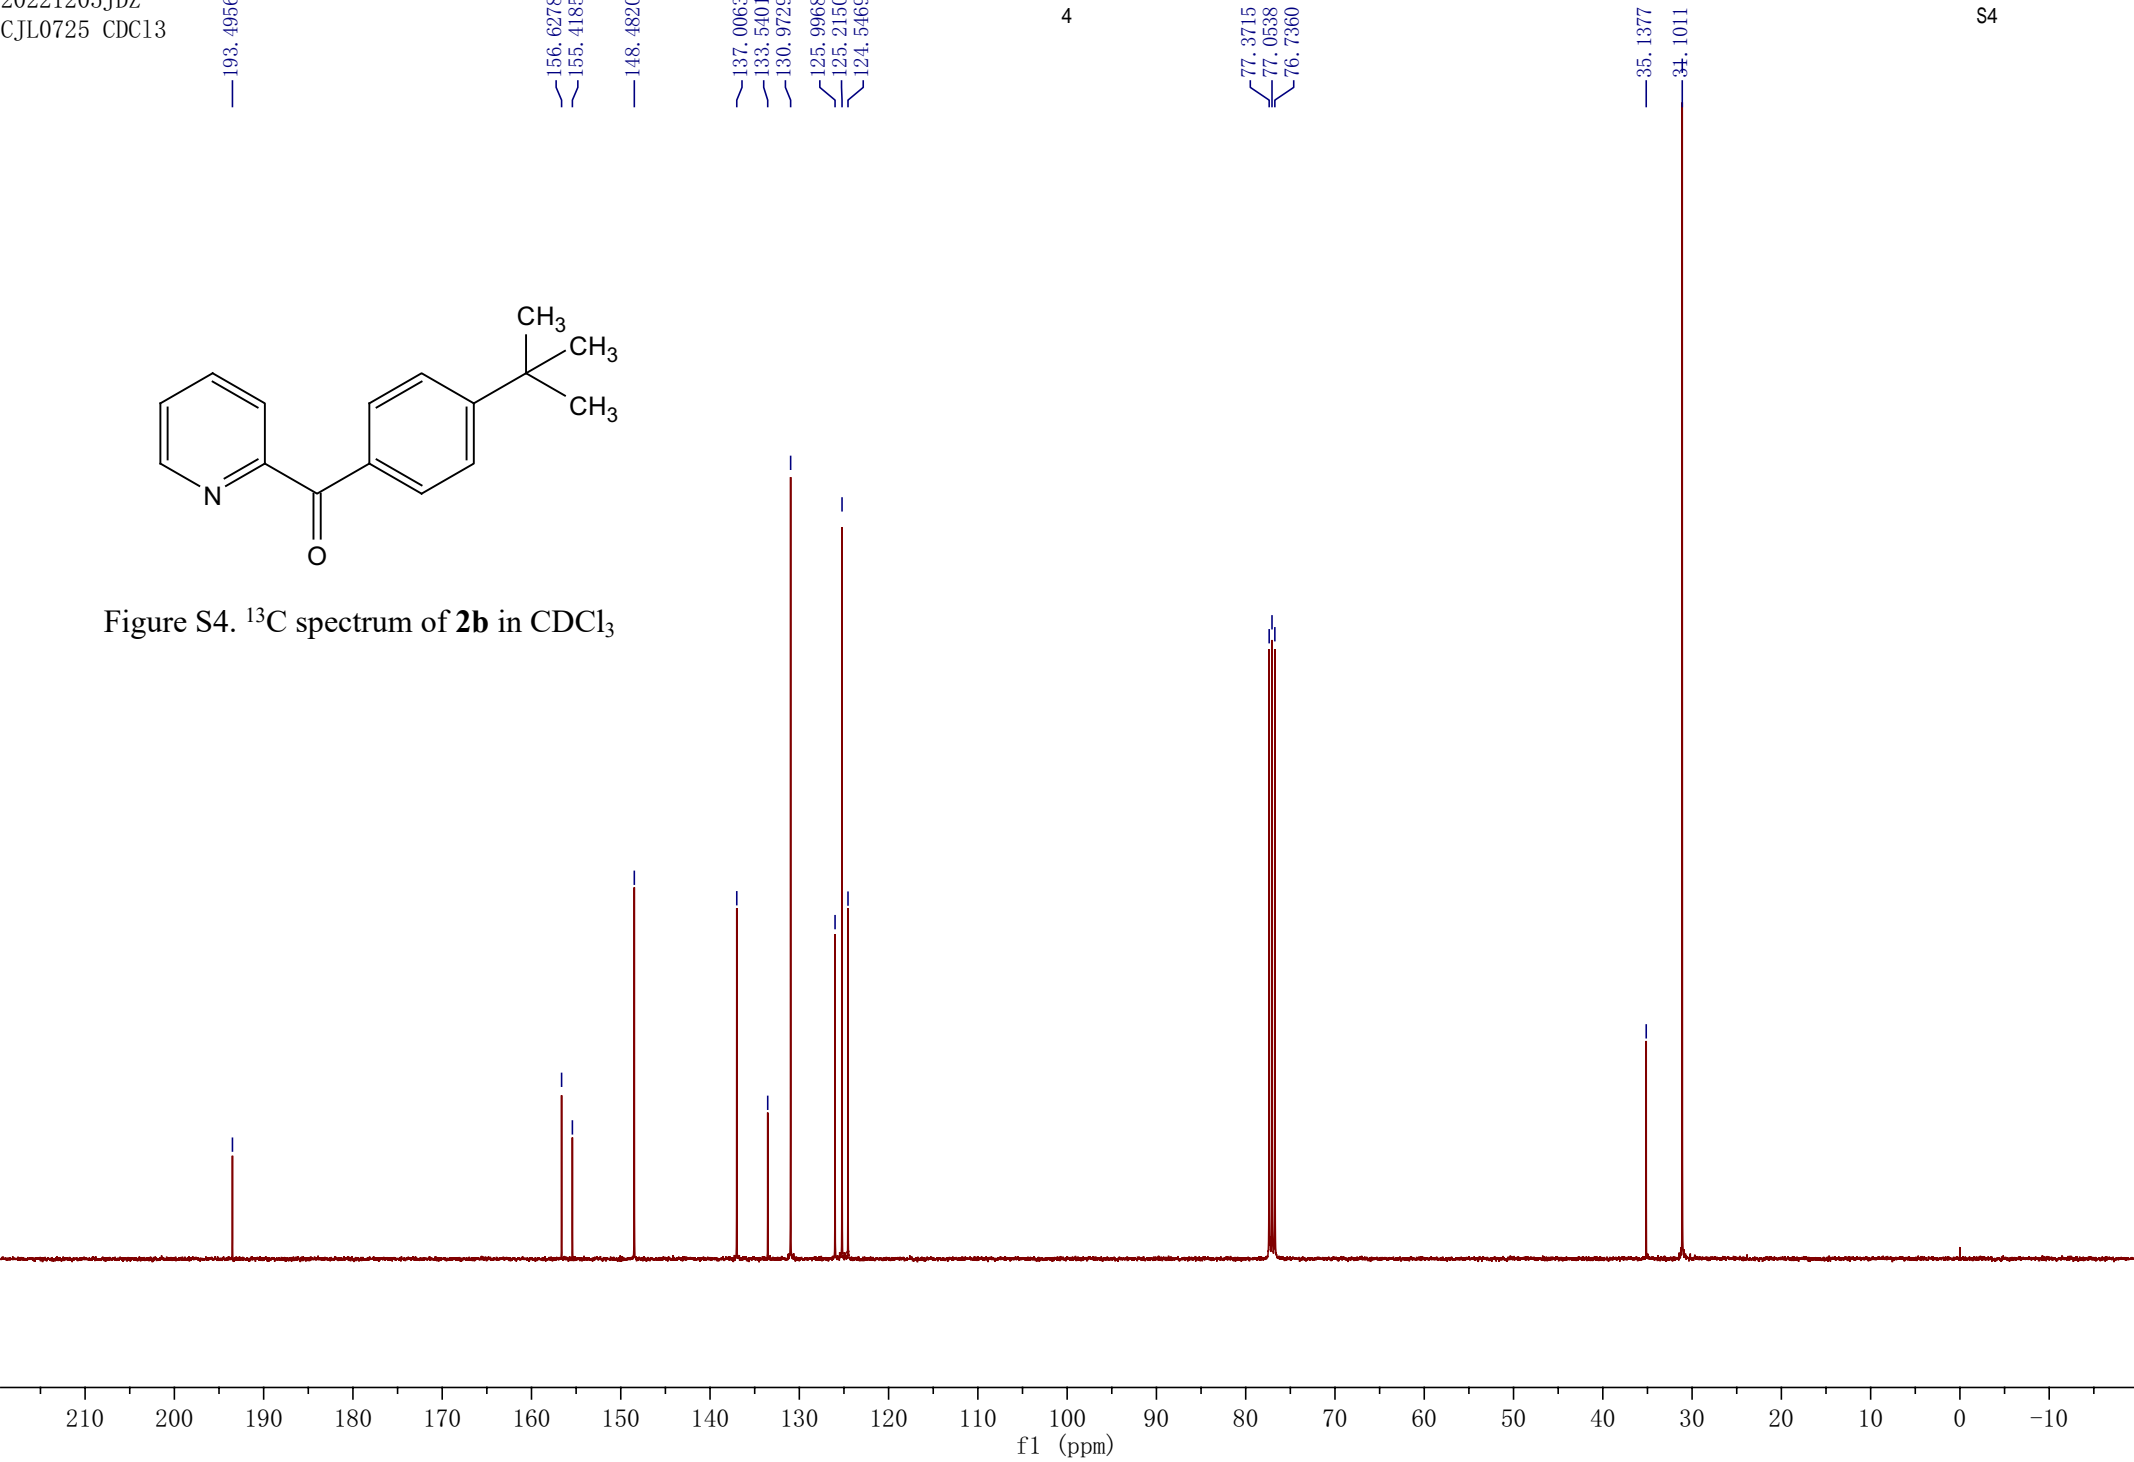

8.7257  
 8.7244  
 8.7140  
 8.1866  
 7.9528  
 7.9330  
 7.7328  
 7.7302  
 7.5689  
 7.5643  
 7.5559  
 7.5486  
 7.5400  
 7.5310  
 7.2817

1.5975

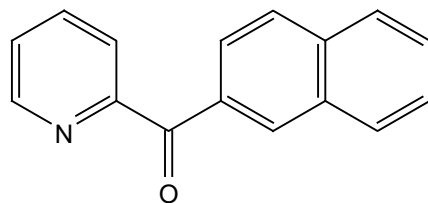

Figure S5. <sup>1</sup>H spectrum of **2c** in CDCl<sub>3</sub>

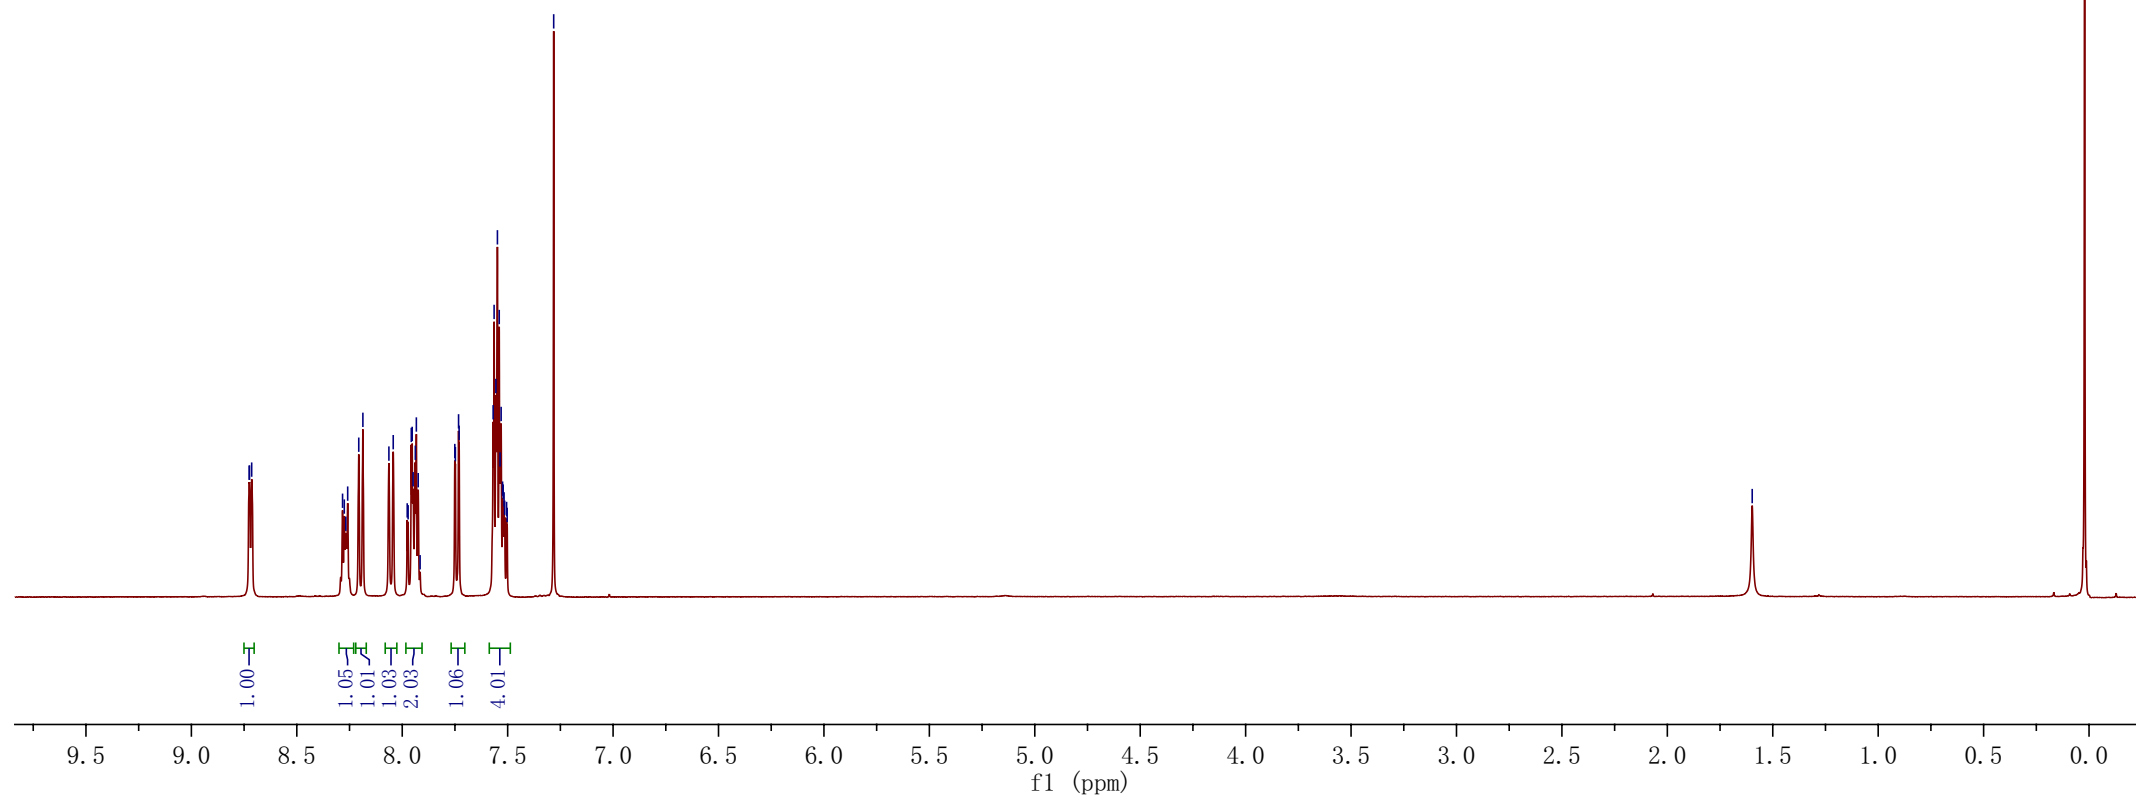

— 196.5869

— 155.5215

— 149.1930

— 137.0035

— 134.7019

— 133.8449

— 132.2412

— 131.2772

— 129.9458

— 128.4813

— 127.4439

— 126.5374

— 126.3179

— 125.6869

— 124.6193

— 124.1878

6

S6

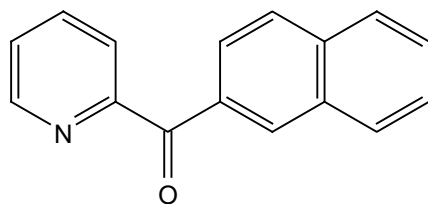

Figure S6. <sup>13</sup>C spectrum of **2c** in CDCl<sub>3</sub>

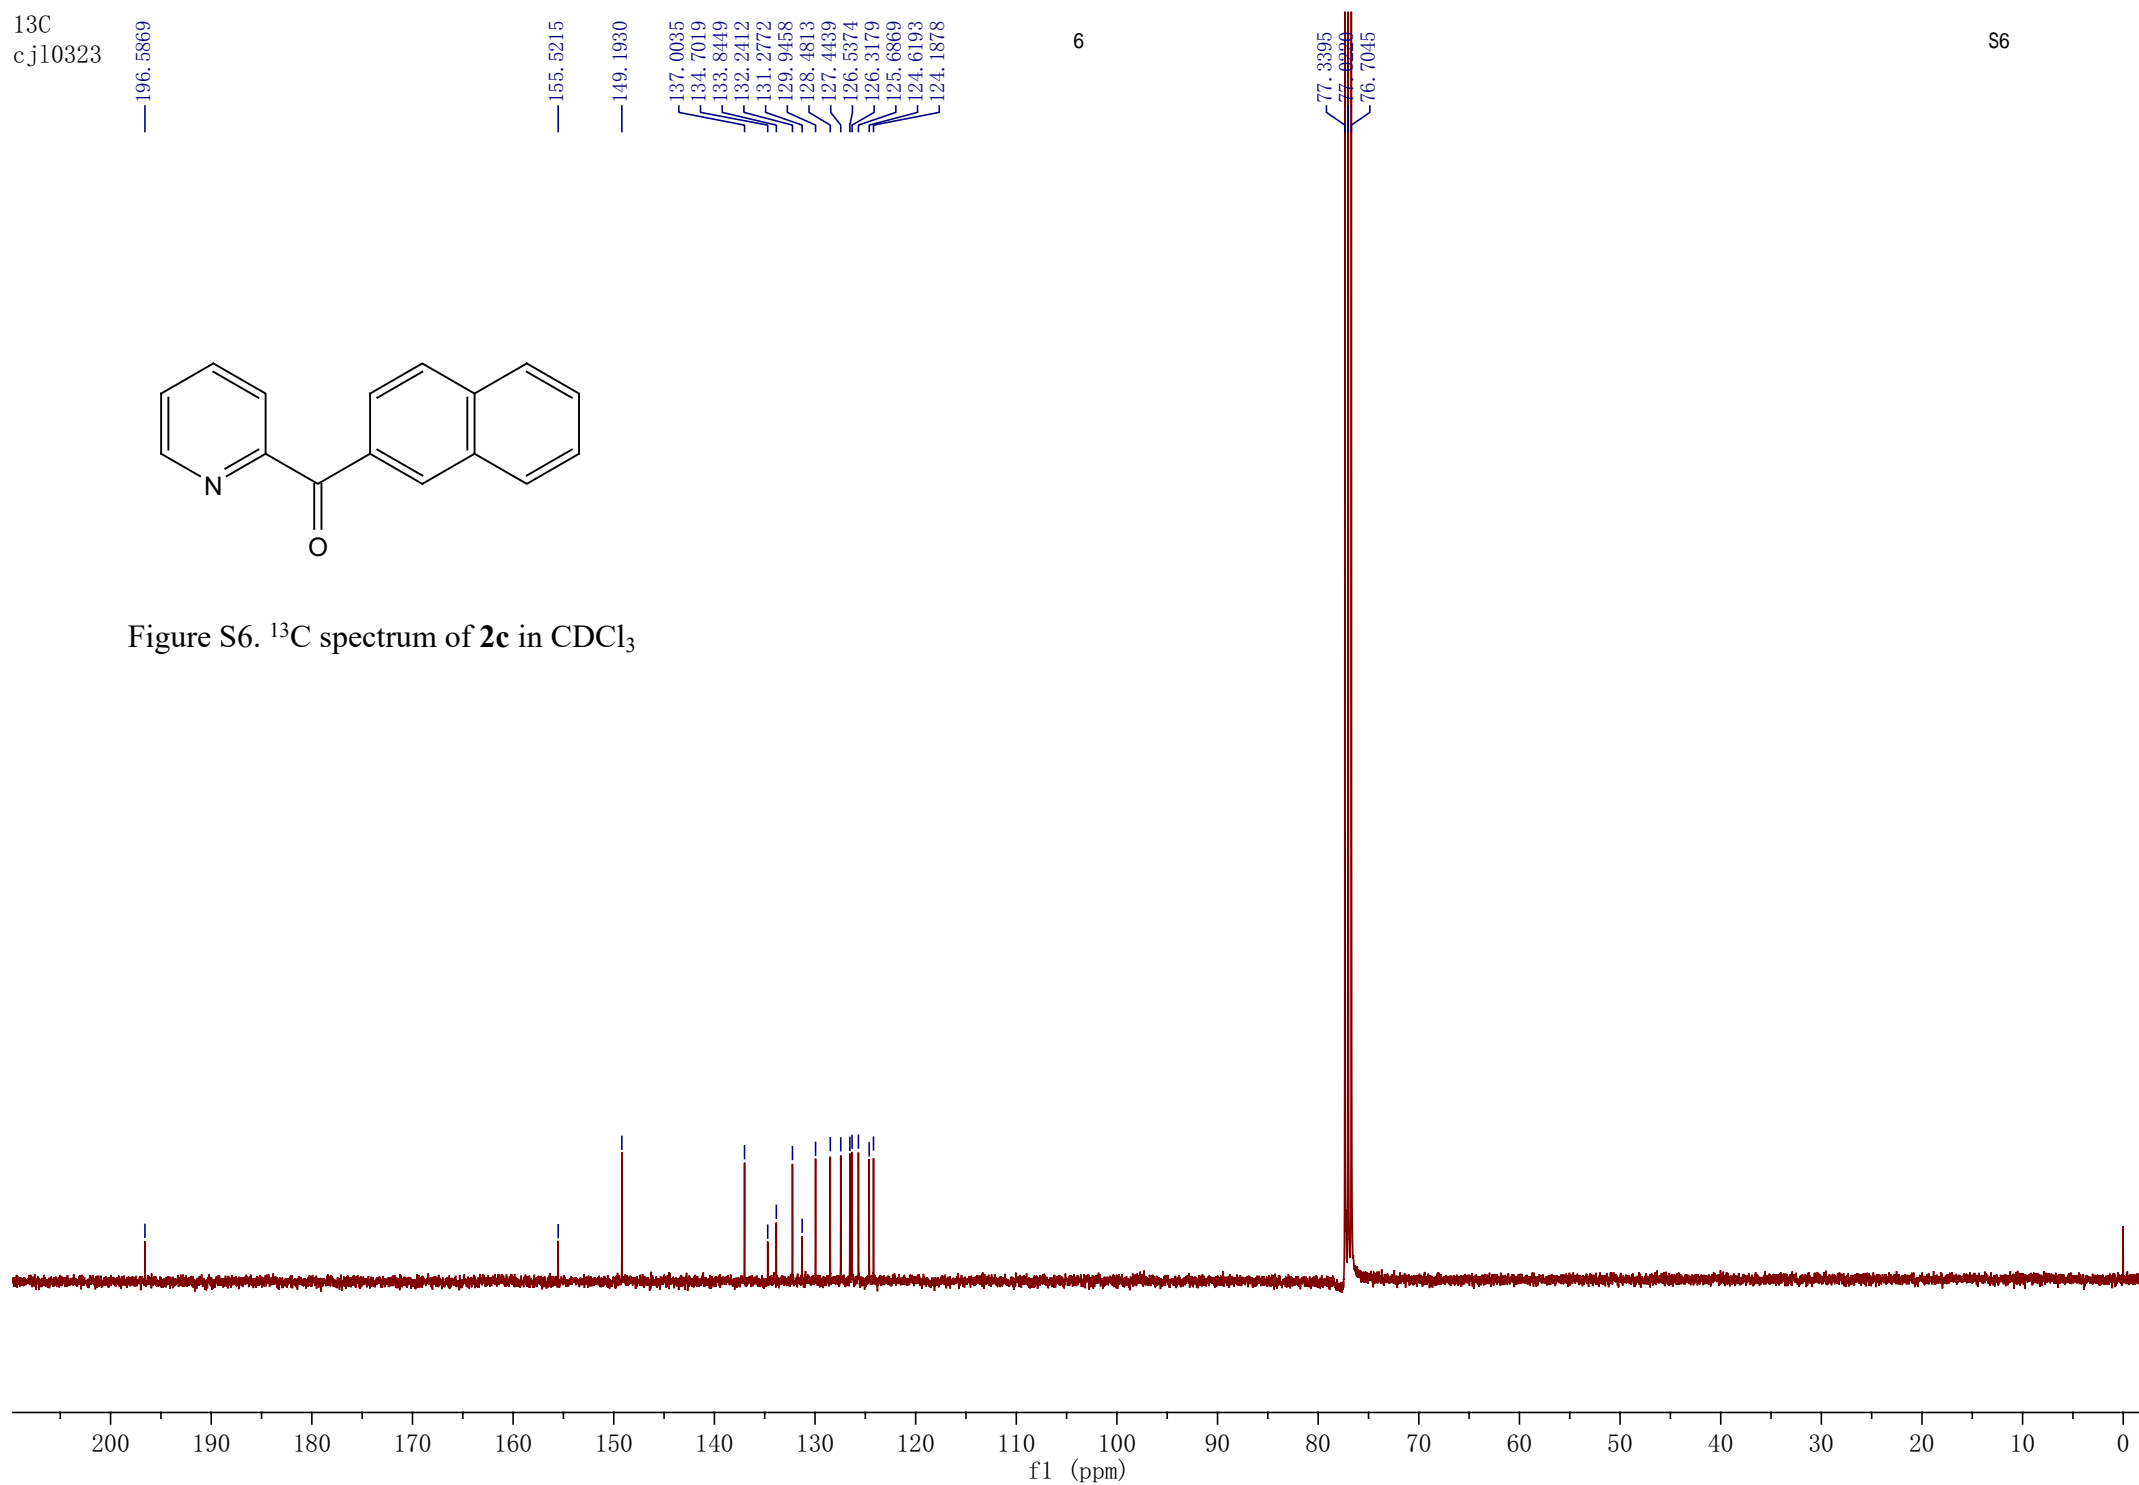

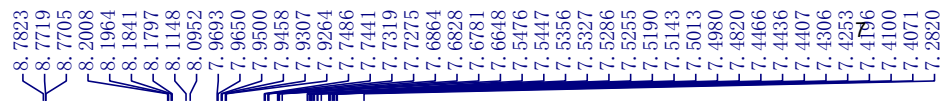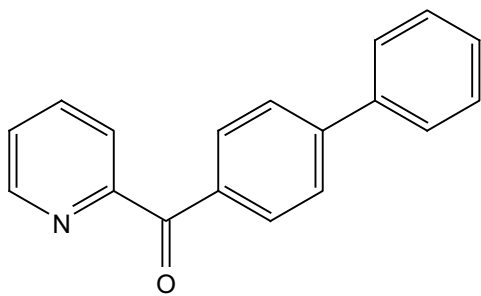

Figure S7.  $^1\text{H}$  spectrum of **2d** in  $\text{CDCl}_3$

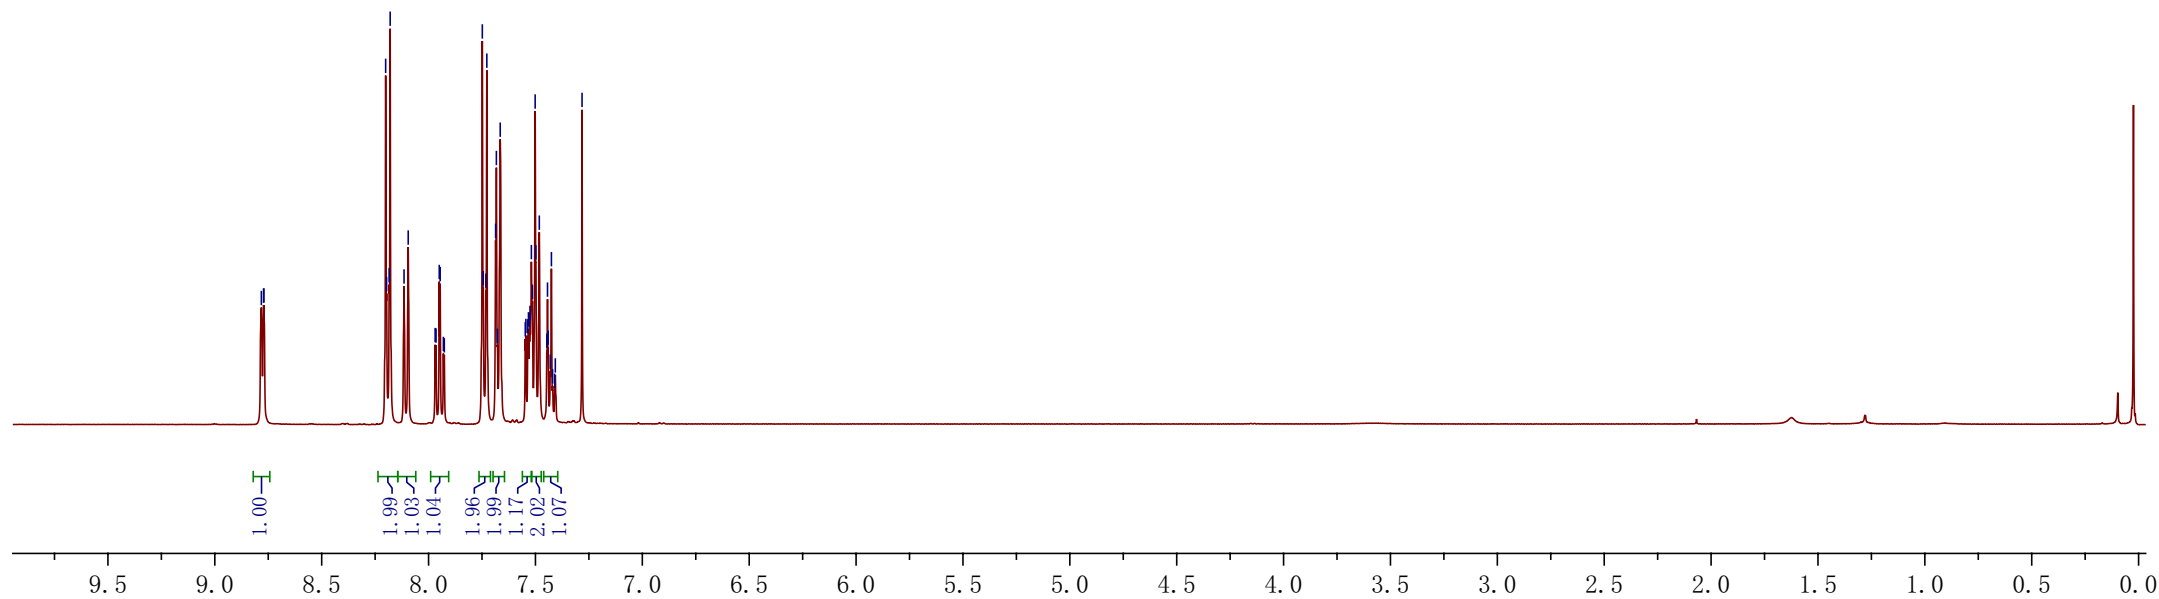

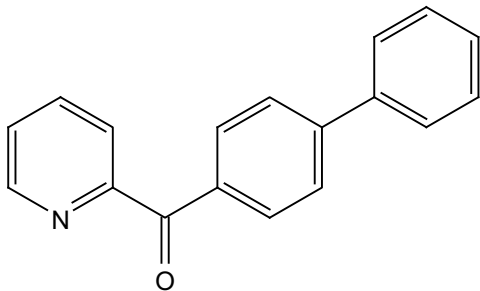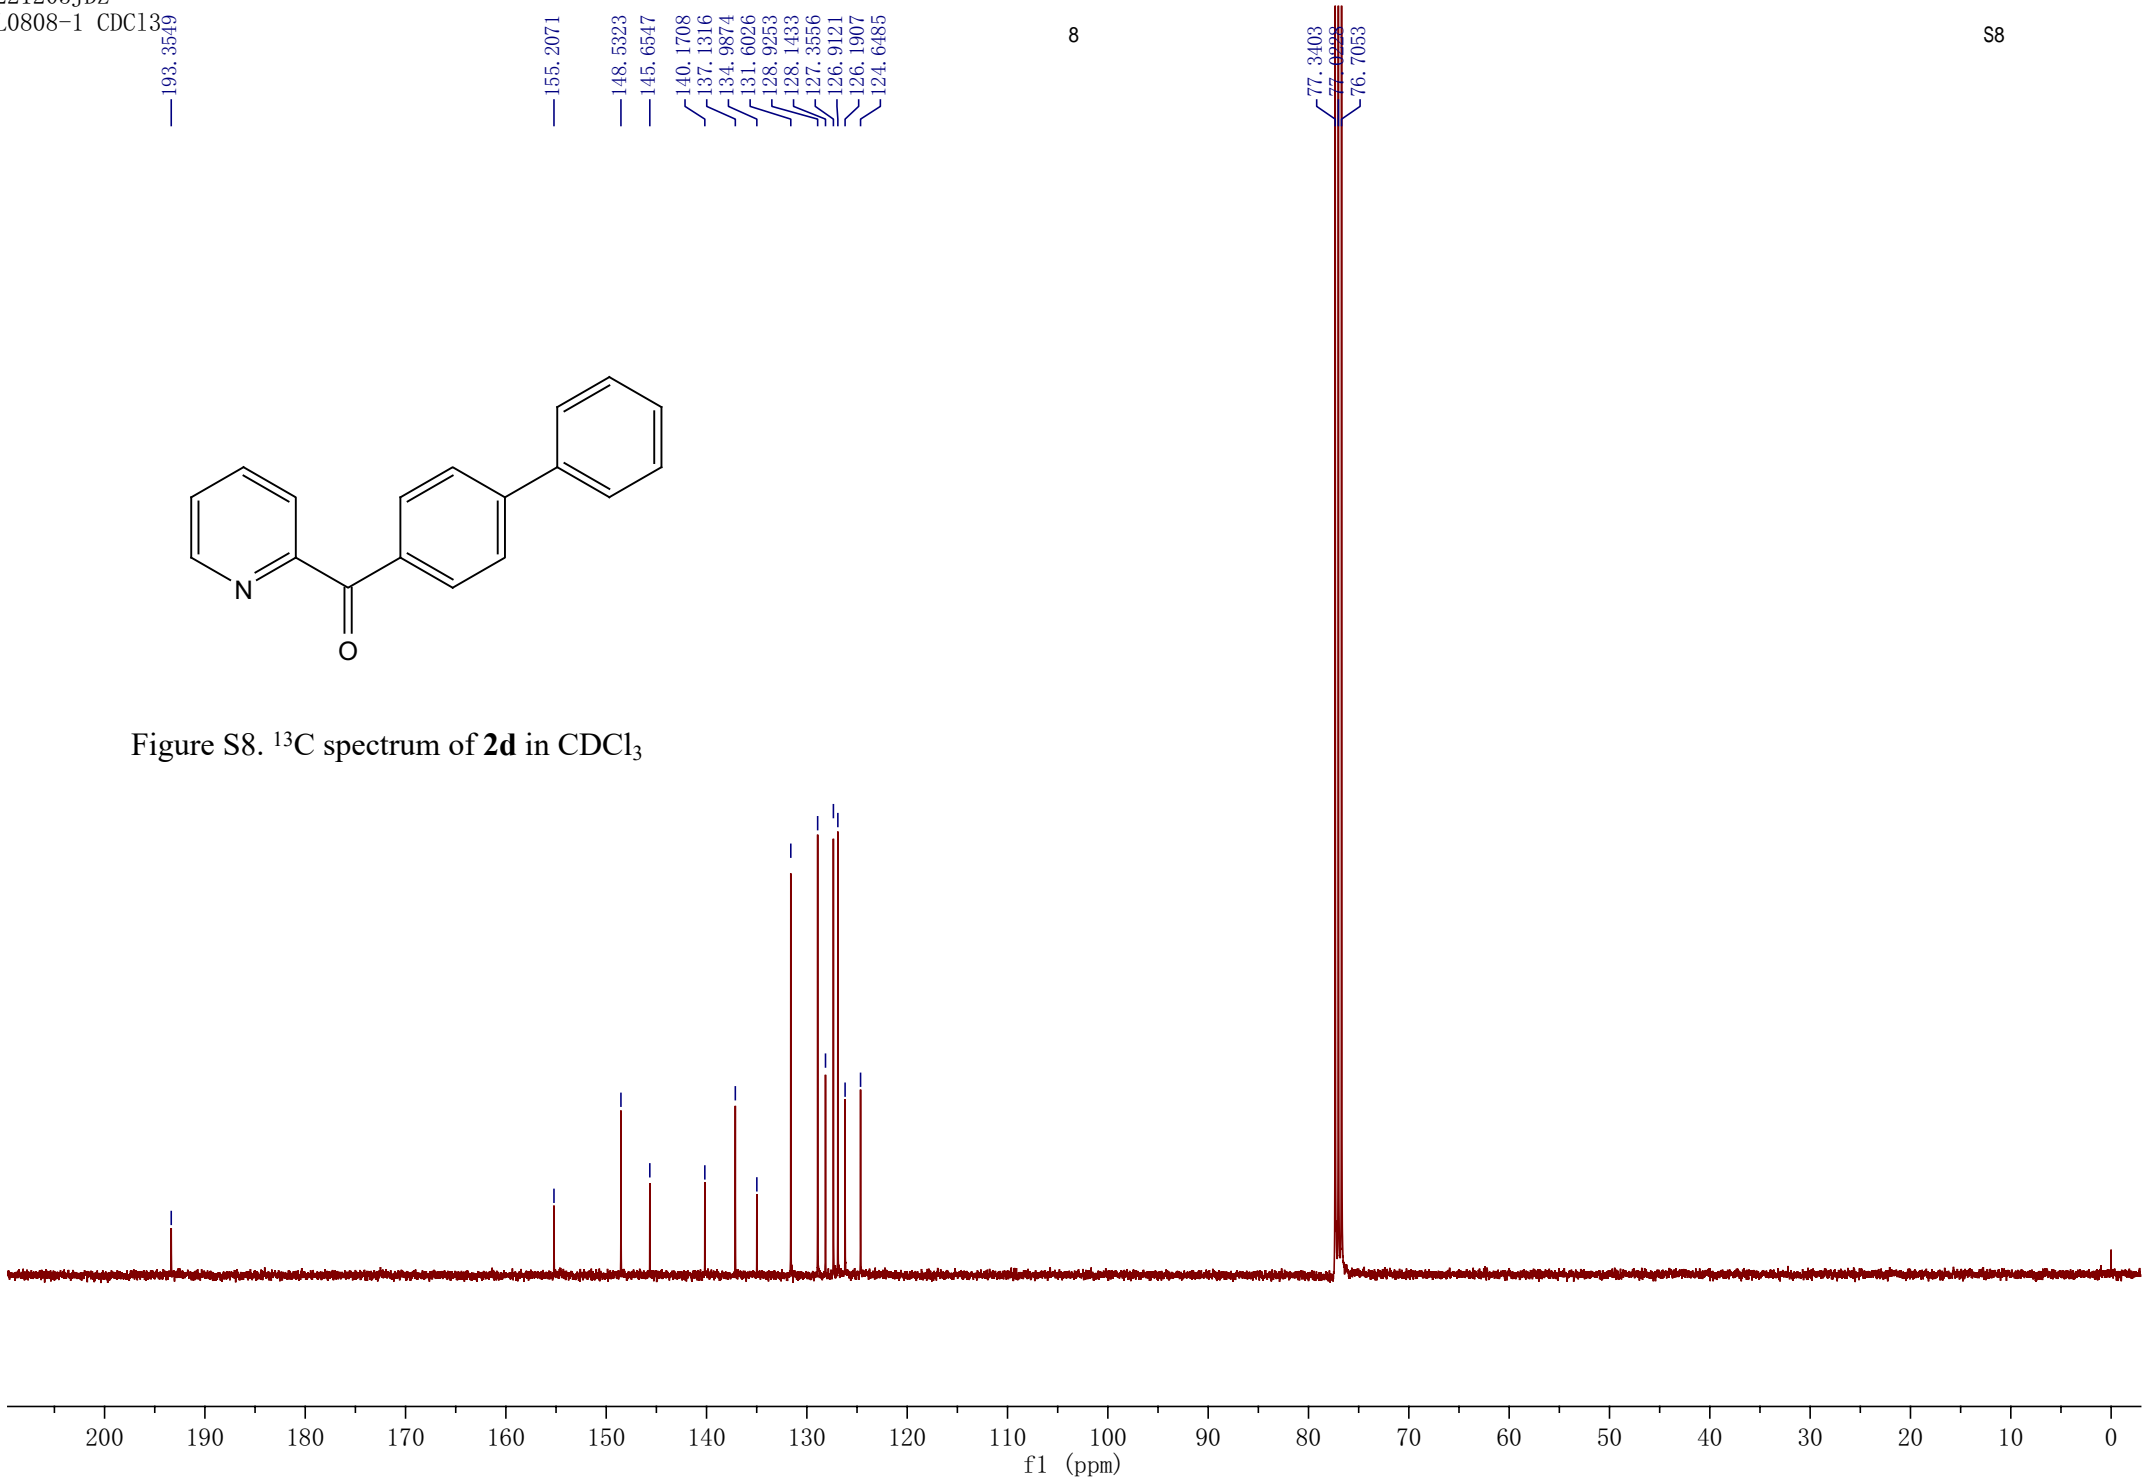

8.7390  
8.7375  
8.7272  
8.7257  
8.1102  
8.0906  
8.0733  
8.0541  
8.0154  
7.9272  
7.9230  
7.5503  
7.5363  
7.5303  
7.5245  
7.5215  
7.5173  
7.5142  
7.5107  
7.5054  
7.5025  
7.4635  
7.4608  
7.4580  
7.4430  
7.4402  
7.4375

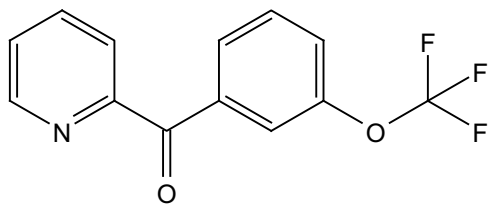

Figure S9.  $^1\text{H}$  spectrum of **2e** in  $\text{CDCl}_3$

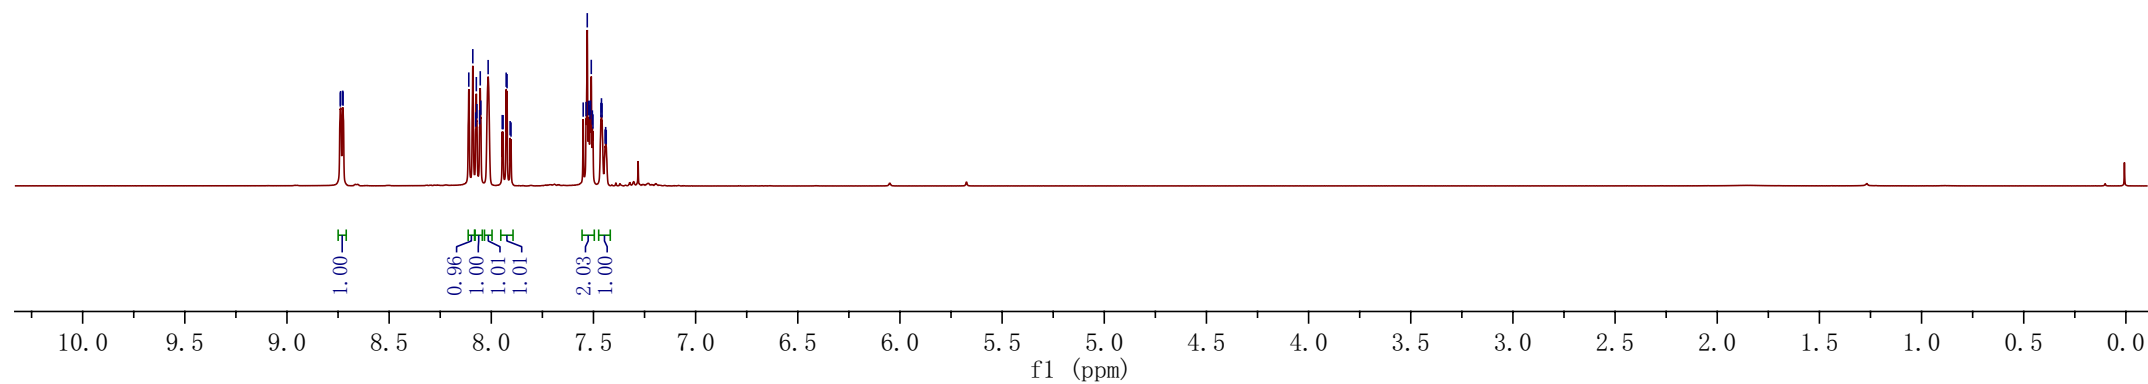

—191.9073

148.9825  
148.5722138.1087  
137.2210129.5600  
129.4882  
126.5948  
125.0864  
124.7120  
124.3226  
123.4499  
121.7605  
119.1984  
116.6362

10

77.3654  
77.0475  
76.7296

S10

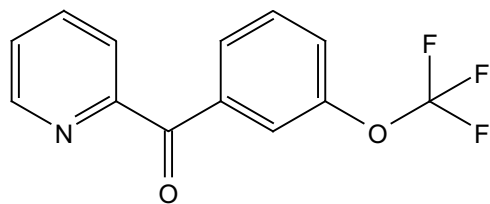Figure S10.  $^{13}\text{C}$  spectrum of **2e** in  $\text{CDCl}_3$ 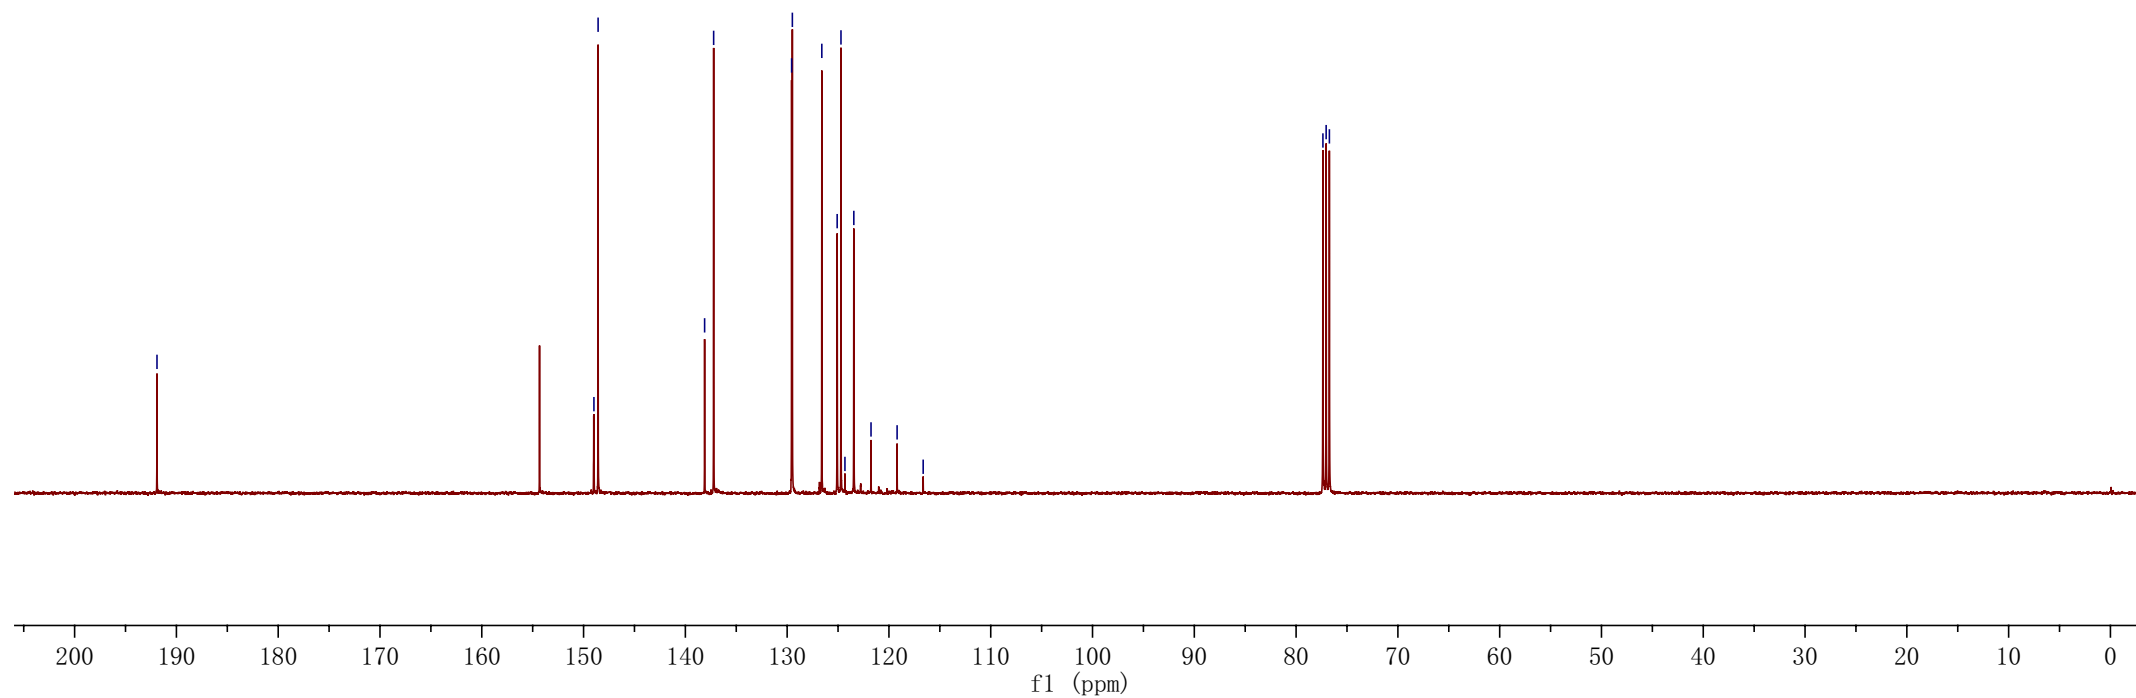



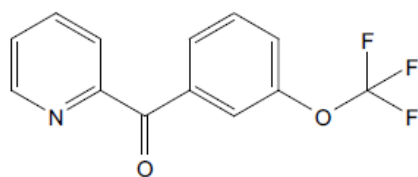

Figure S11. <sup>19</sup>F spectrum of **2e** in CDCl<sub>3</sub>

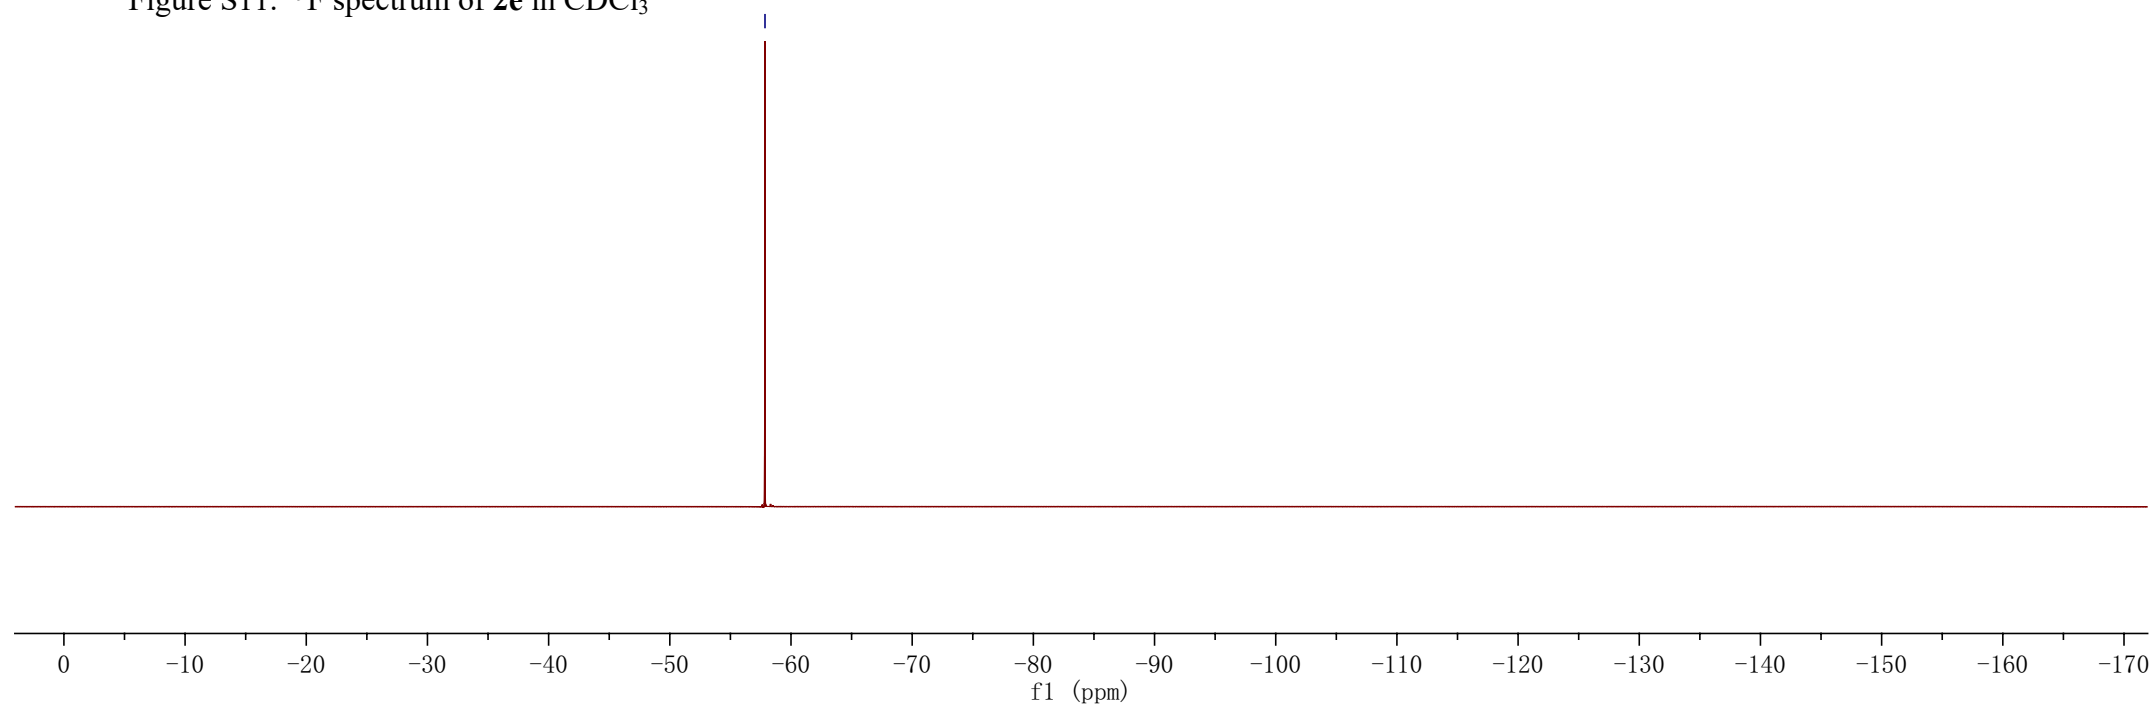

8.7515  
8.7495  
8.7411  
8.7396  
8.1058  
8.0993  
8.0946  
8.0865  
8.0831  
8.0777  
7.9451  
7.5526  
7.5497  
7.5407  
7.5377  
7.5337  
7.5308  
7.5217  
7.5188  
7.5056  
7.4997  
7.4951  
7.4830  
7.4782  
7.4725  
7.2821

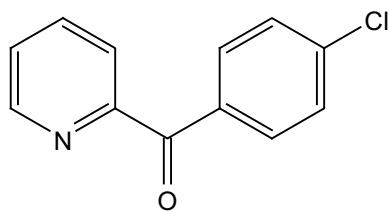

Figure S12.  $^1\text{H}$  spectrum of **2f** in  $\text{CDCl}_3$

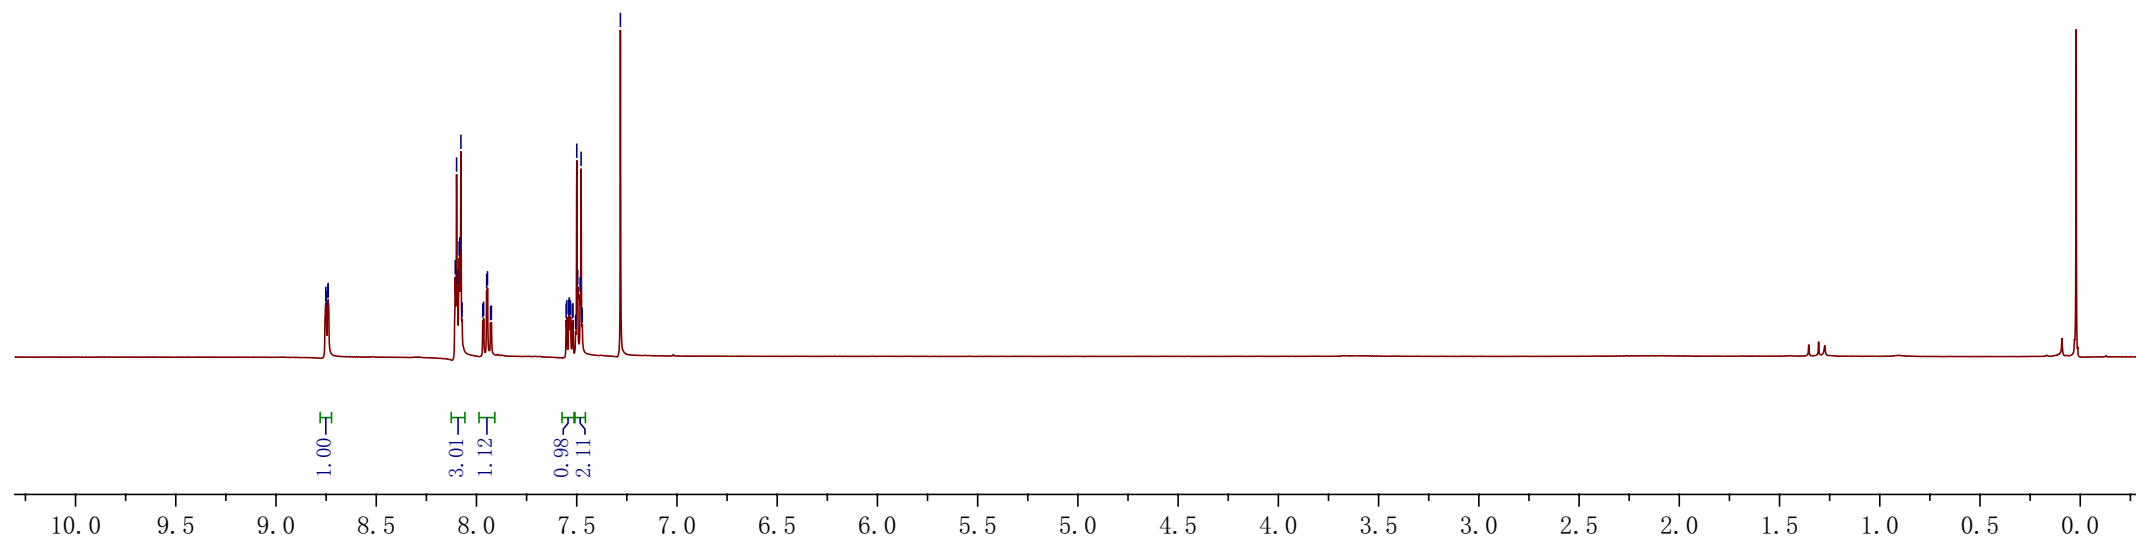

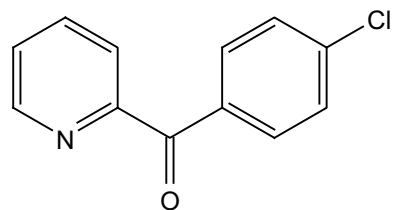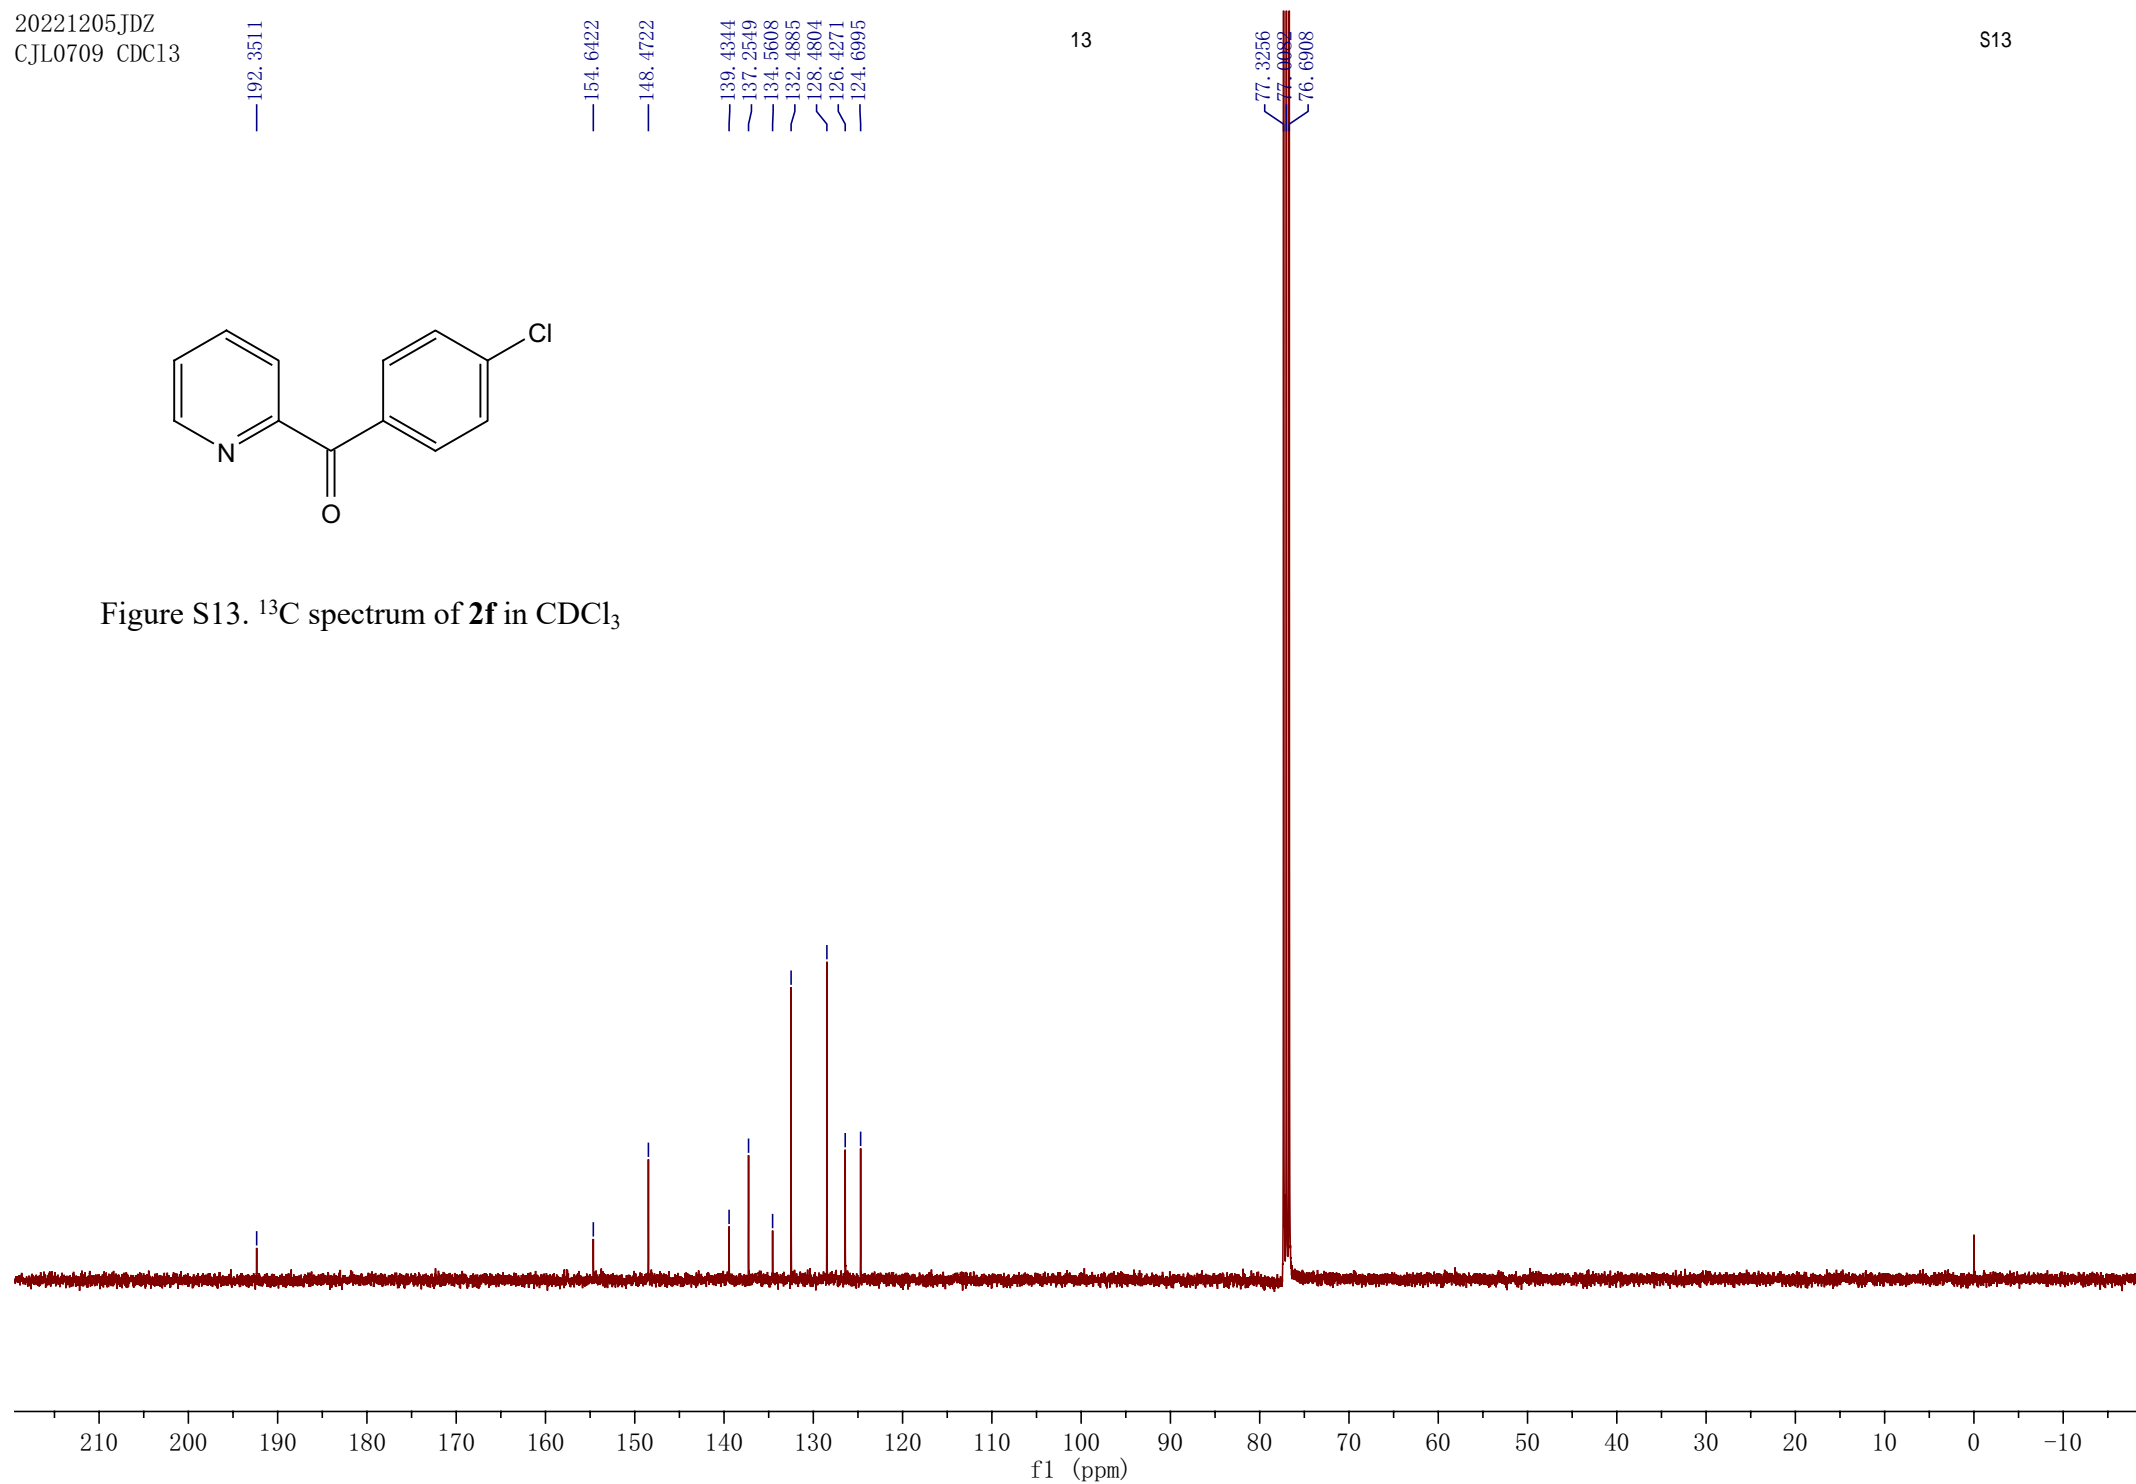

Figure S13. <sup>13</sup>C spectrum of **2f** in CDCl<sub>3</sub>

8.7636  
8.7619  
8.7598  
8.7517  
8.7500  
8.1082  
8.1048  
8.1002  
8.0881  
7.9935  
7.9468  
7.5997  
7.5971  
7.5946  
7.5919  
7.5797  
7.5771  
7.5746  
7.5719  
7.5661  
7.5532  
7.5442  
7.5412  
7.5372  
7.5342  
7.5252  
7.5223  
7.4740  
7.4544  
7.4346  
7.2819

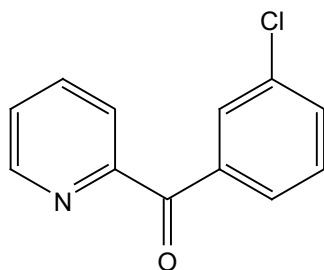

Figure S14.  $^1\text{H}$  spectrum of **2g** in  $\text{CDCl}_3$

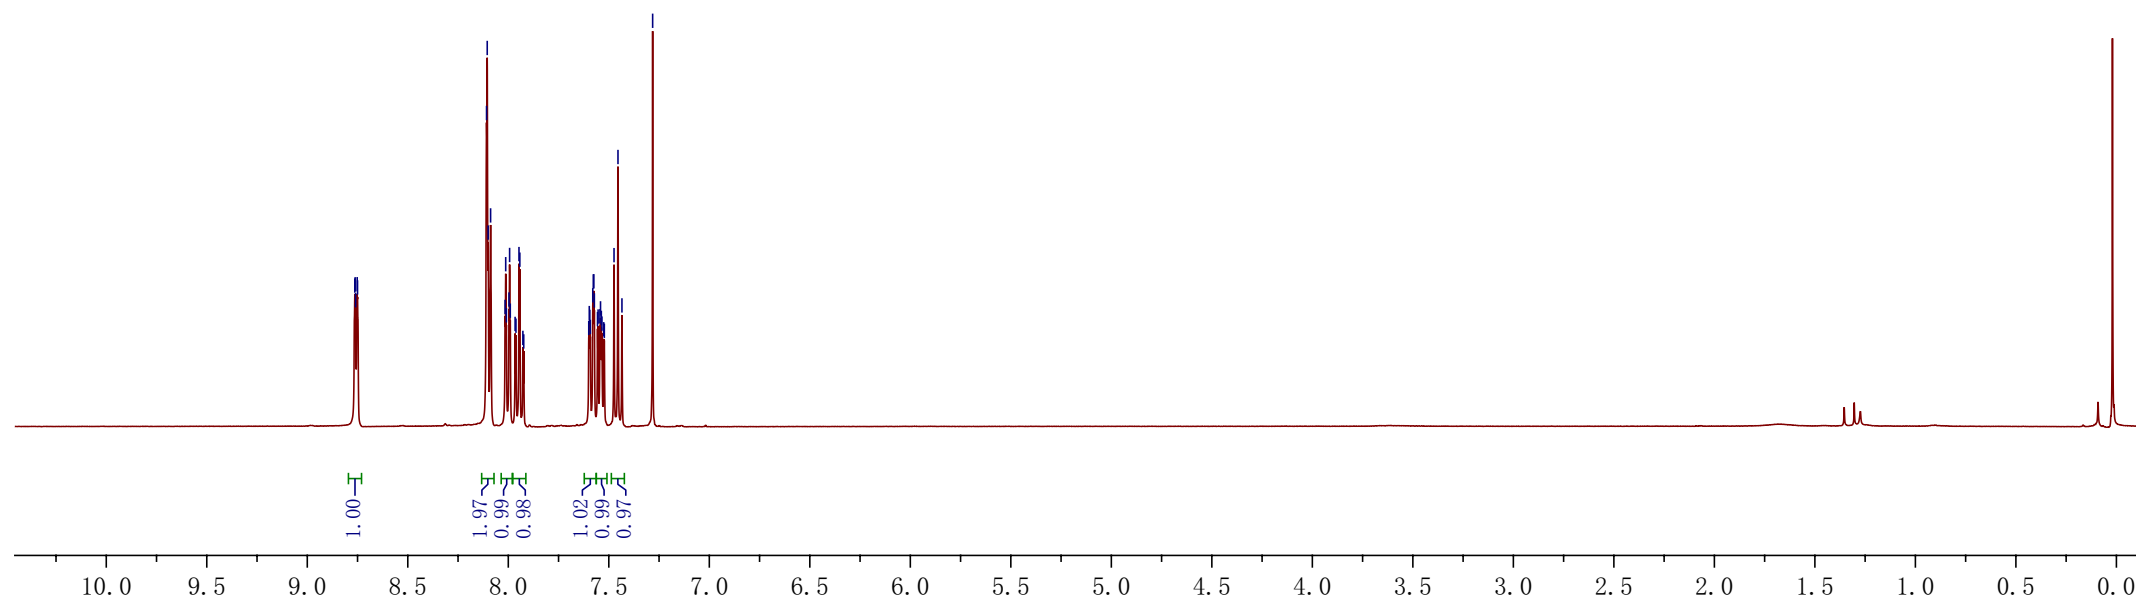

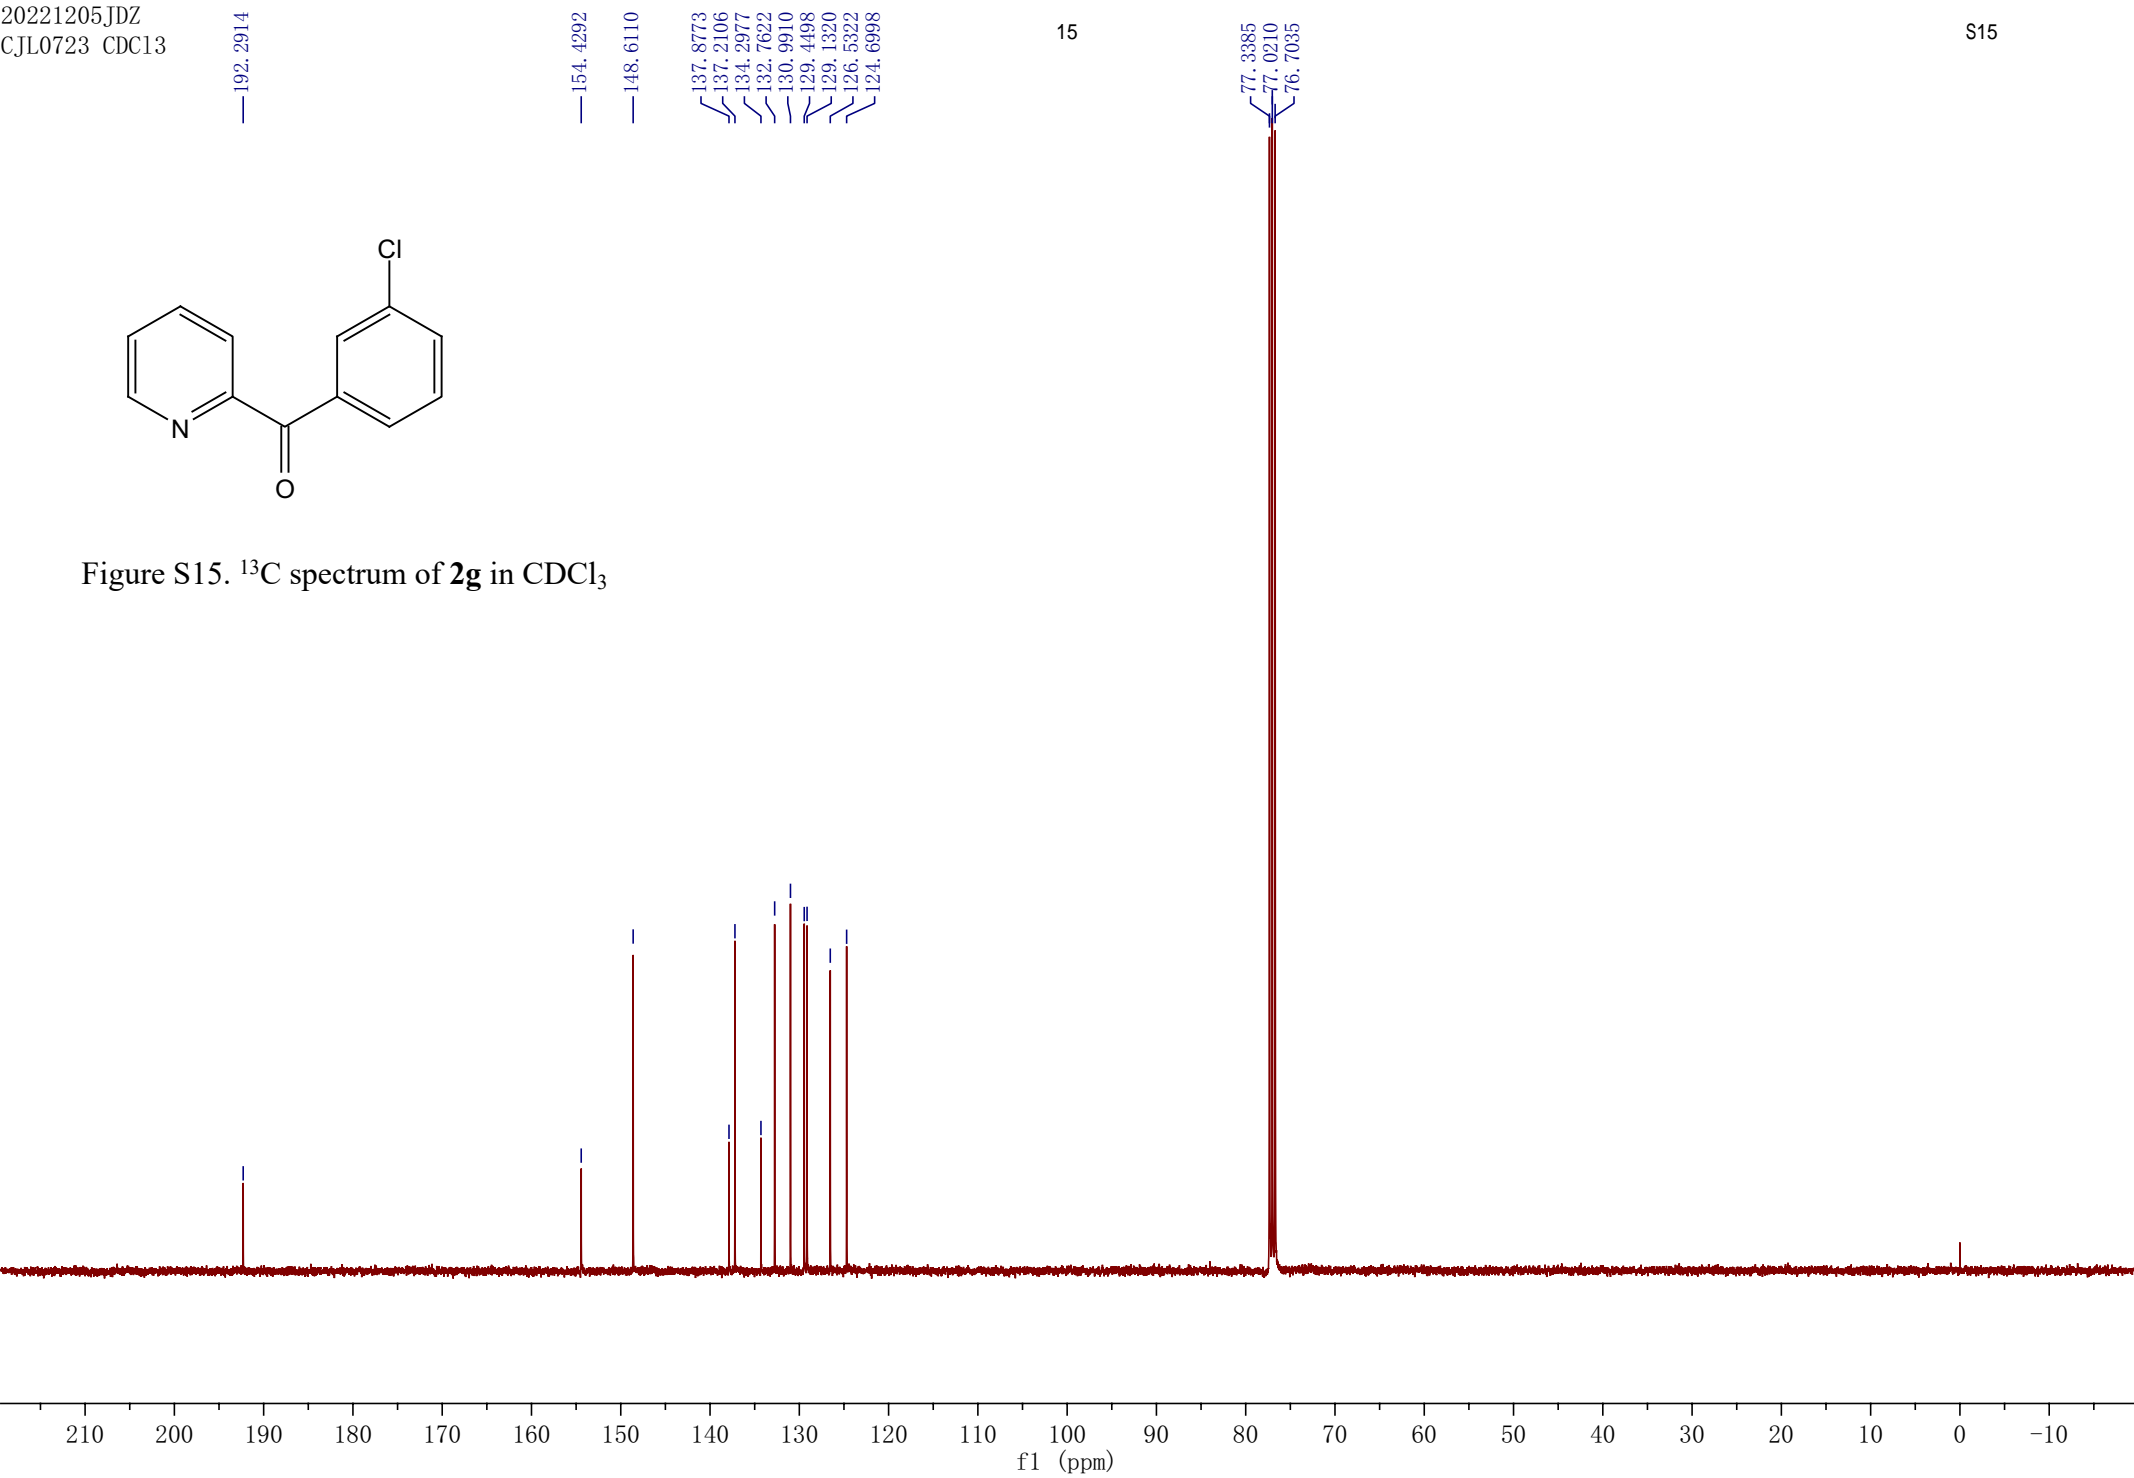

Figure S15. <sup>13</sup>C spectrum of **2g** in CDCl<sub>3</sub>

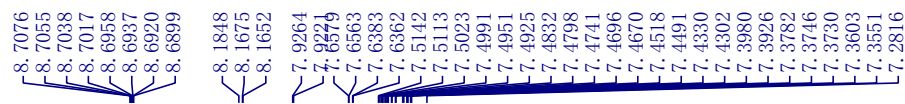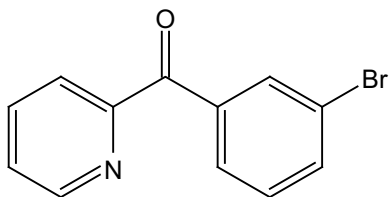

Figure S16.  $^1\text{H}$  spectrum of **2h** in  $\text{CDCl}_3$

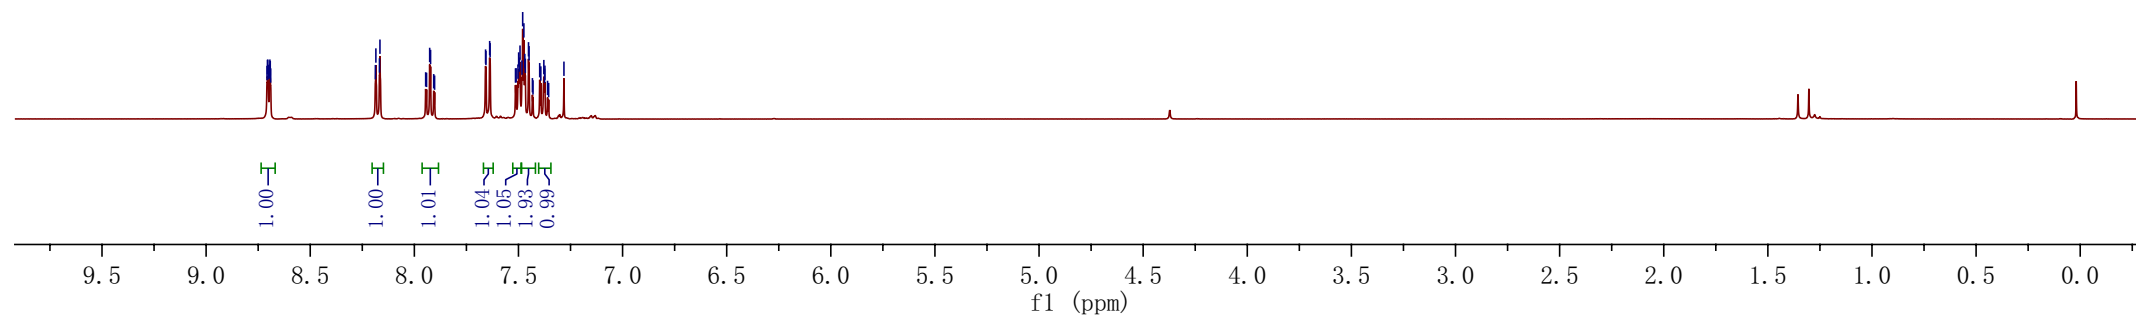

195.7834

153.5043

149.3512

140.3254

137.0321

133.0437

131.5105

129.8470

127.0835

126.9667

123.9374

120.0884

17

77.3563

77.0386

76.7210

S17

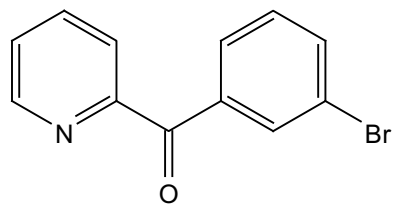

Figure S17. <sup>13</sup>C spectrum of **2h** in CDCl<sub>3</sub>

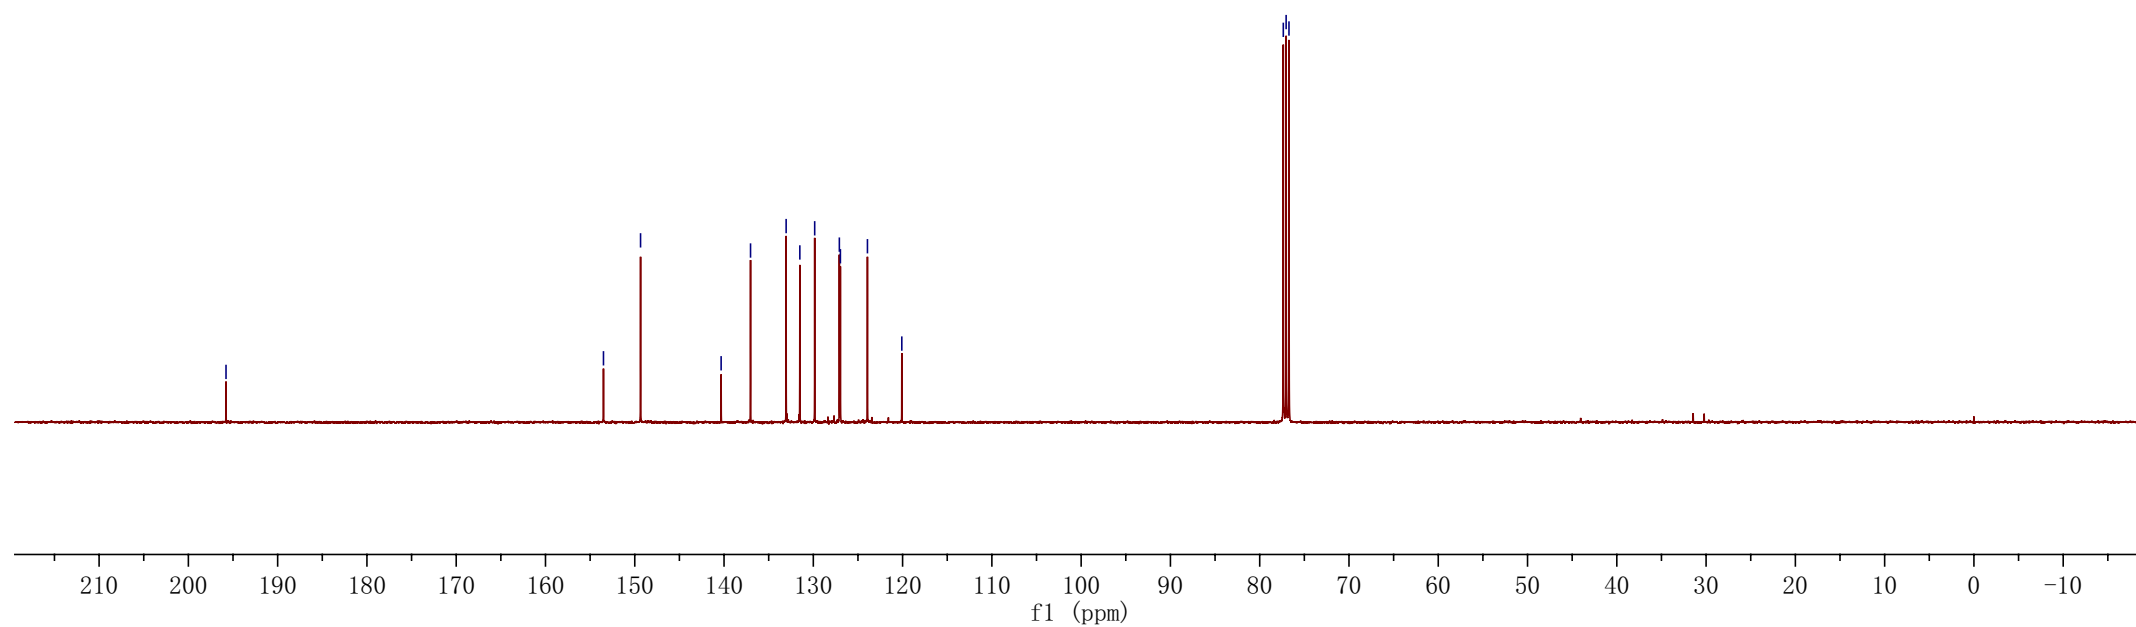

8.7550  
8.7445  
8.7433  
8.6703  
8.6664  
8.6627  
8.3187  
8.2994  
8.1406  
8.1210  
7.9579  
7.9537  
7.6399  
7.6205  
7.6011  
7.5467  
7.2819

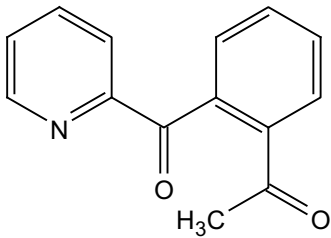

Figure S18. <sup>1</sup>H spectrum of **2i** in CDCl<sub>3</sub>

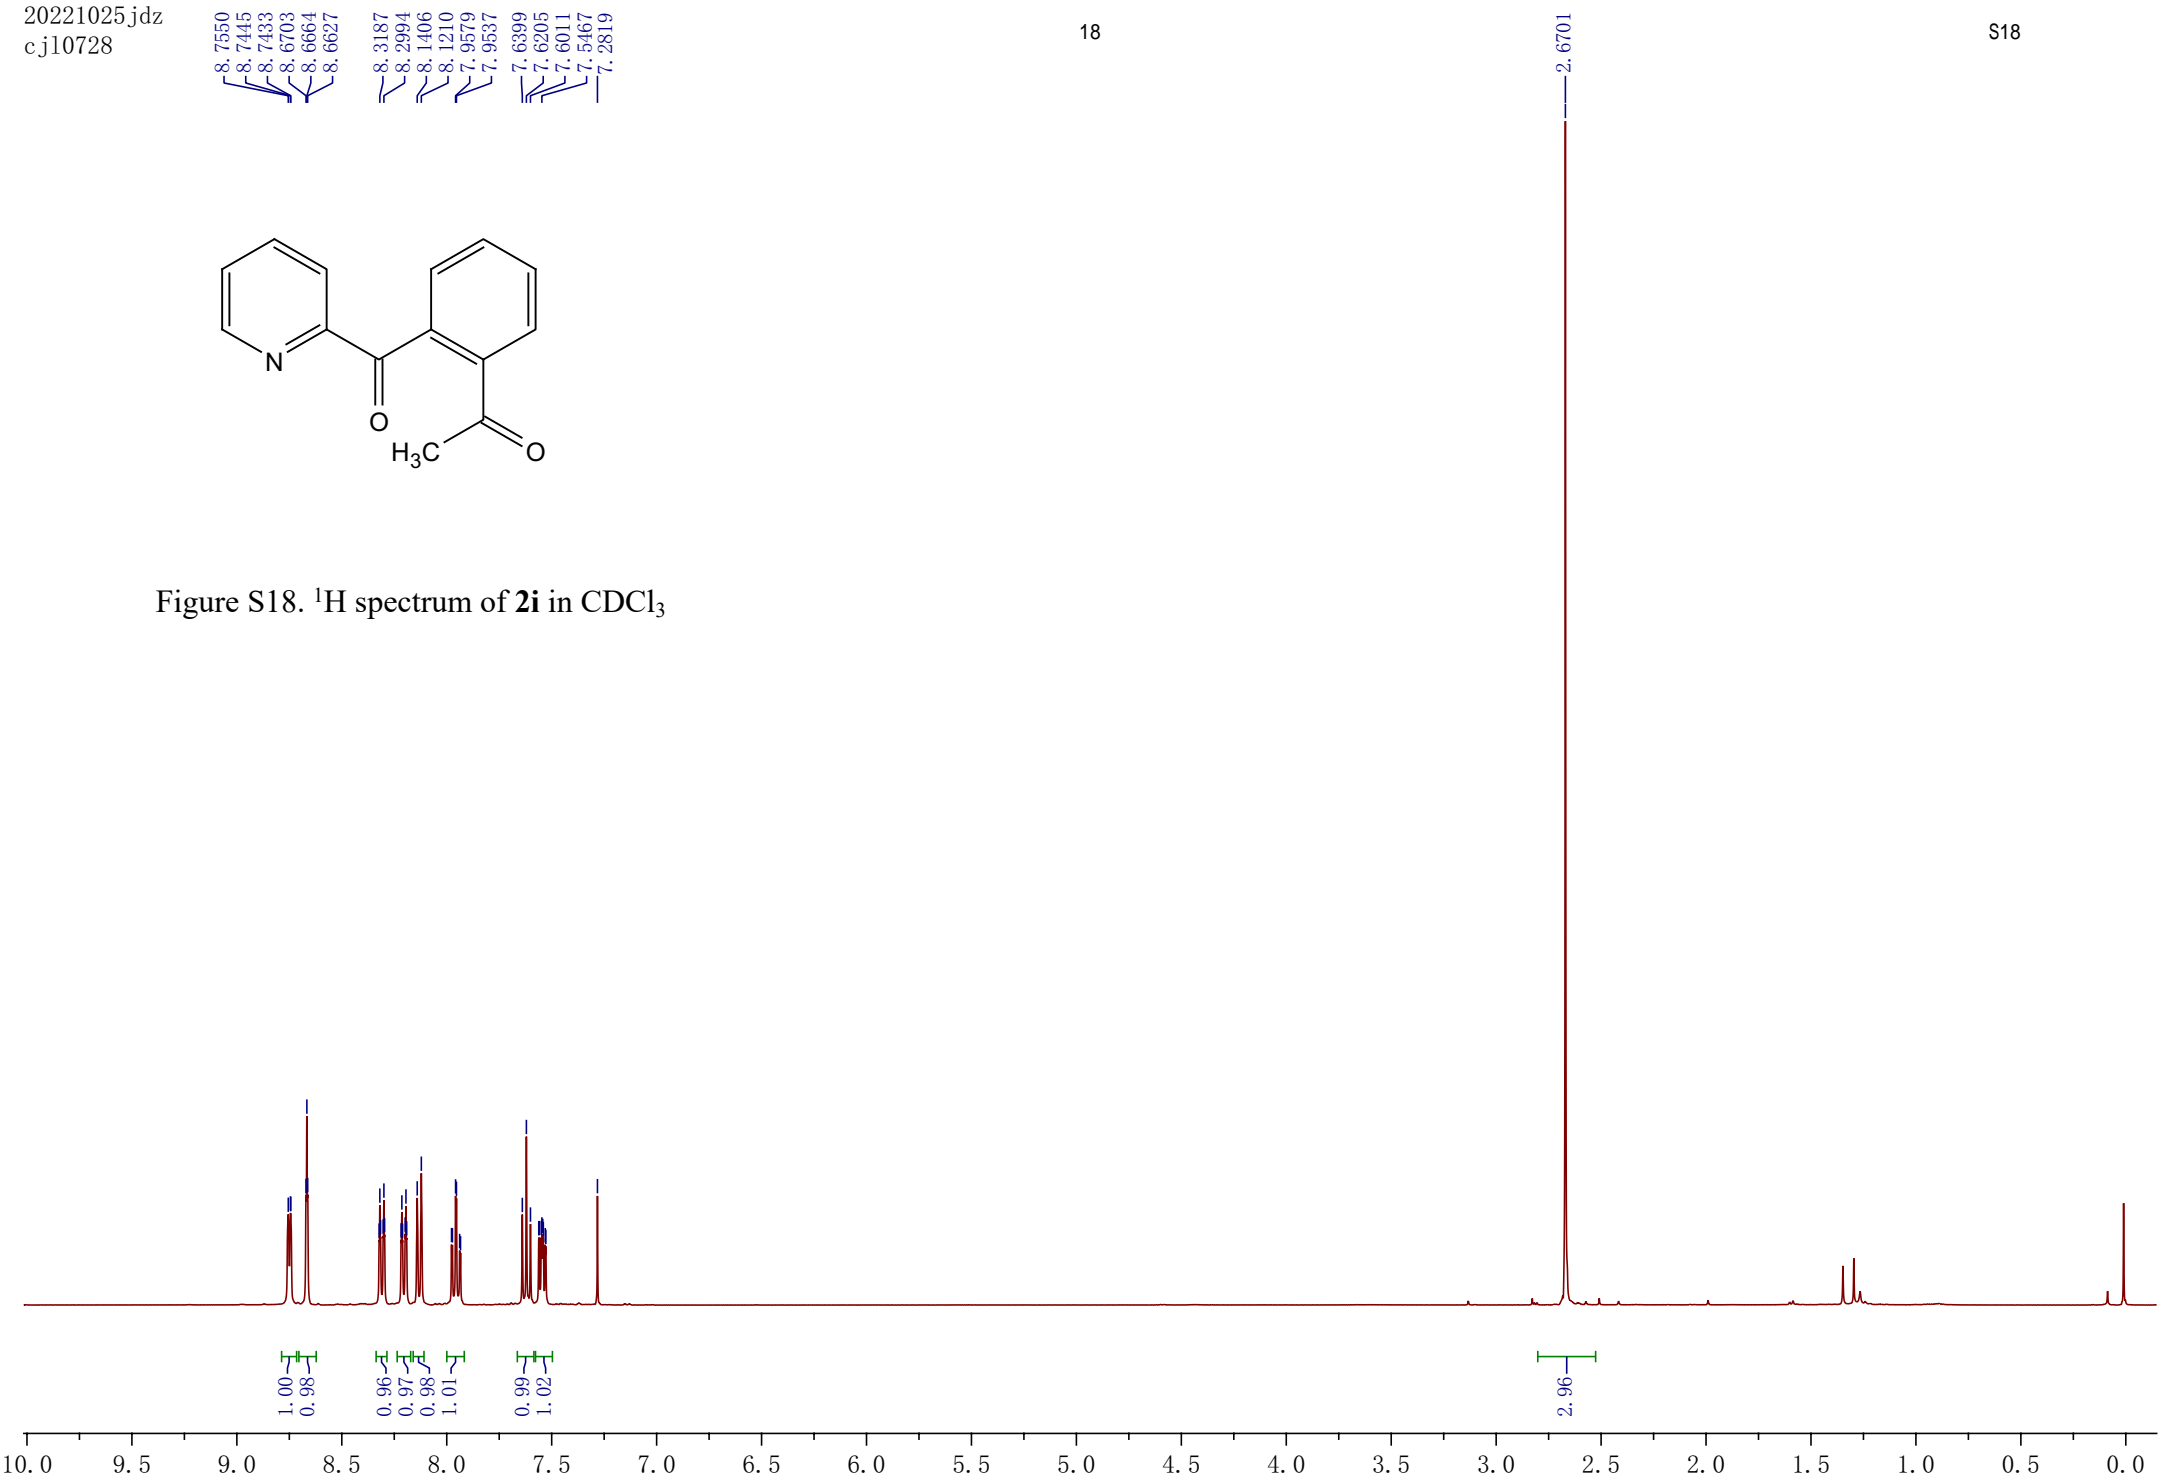



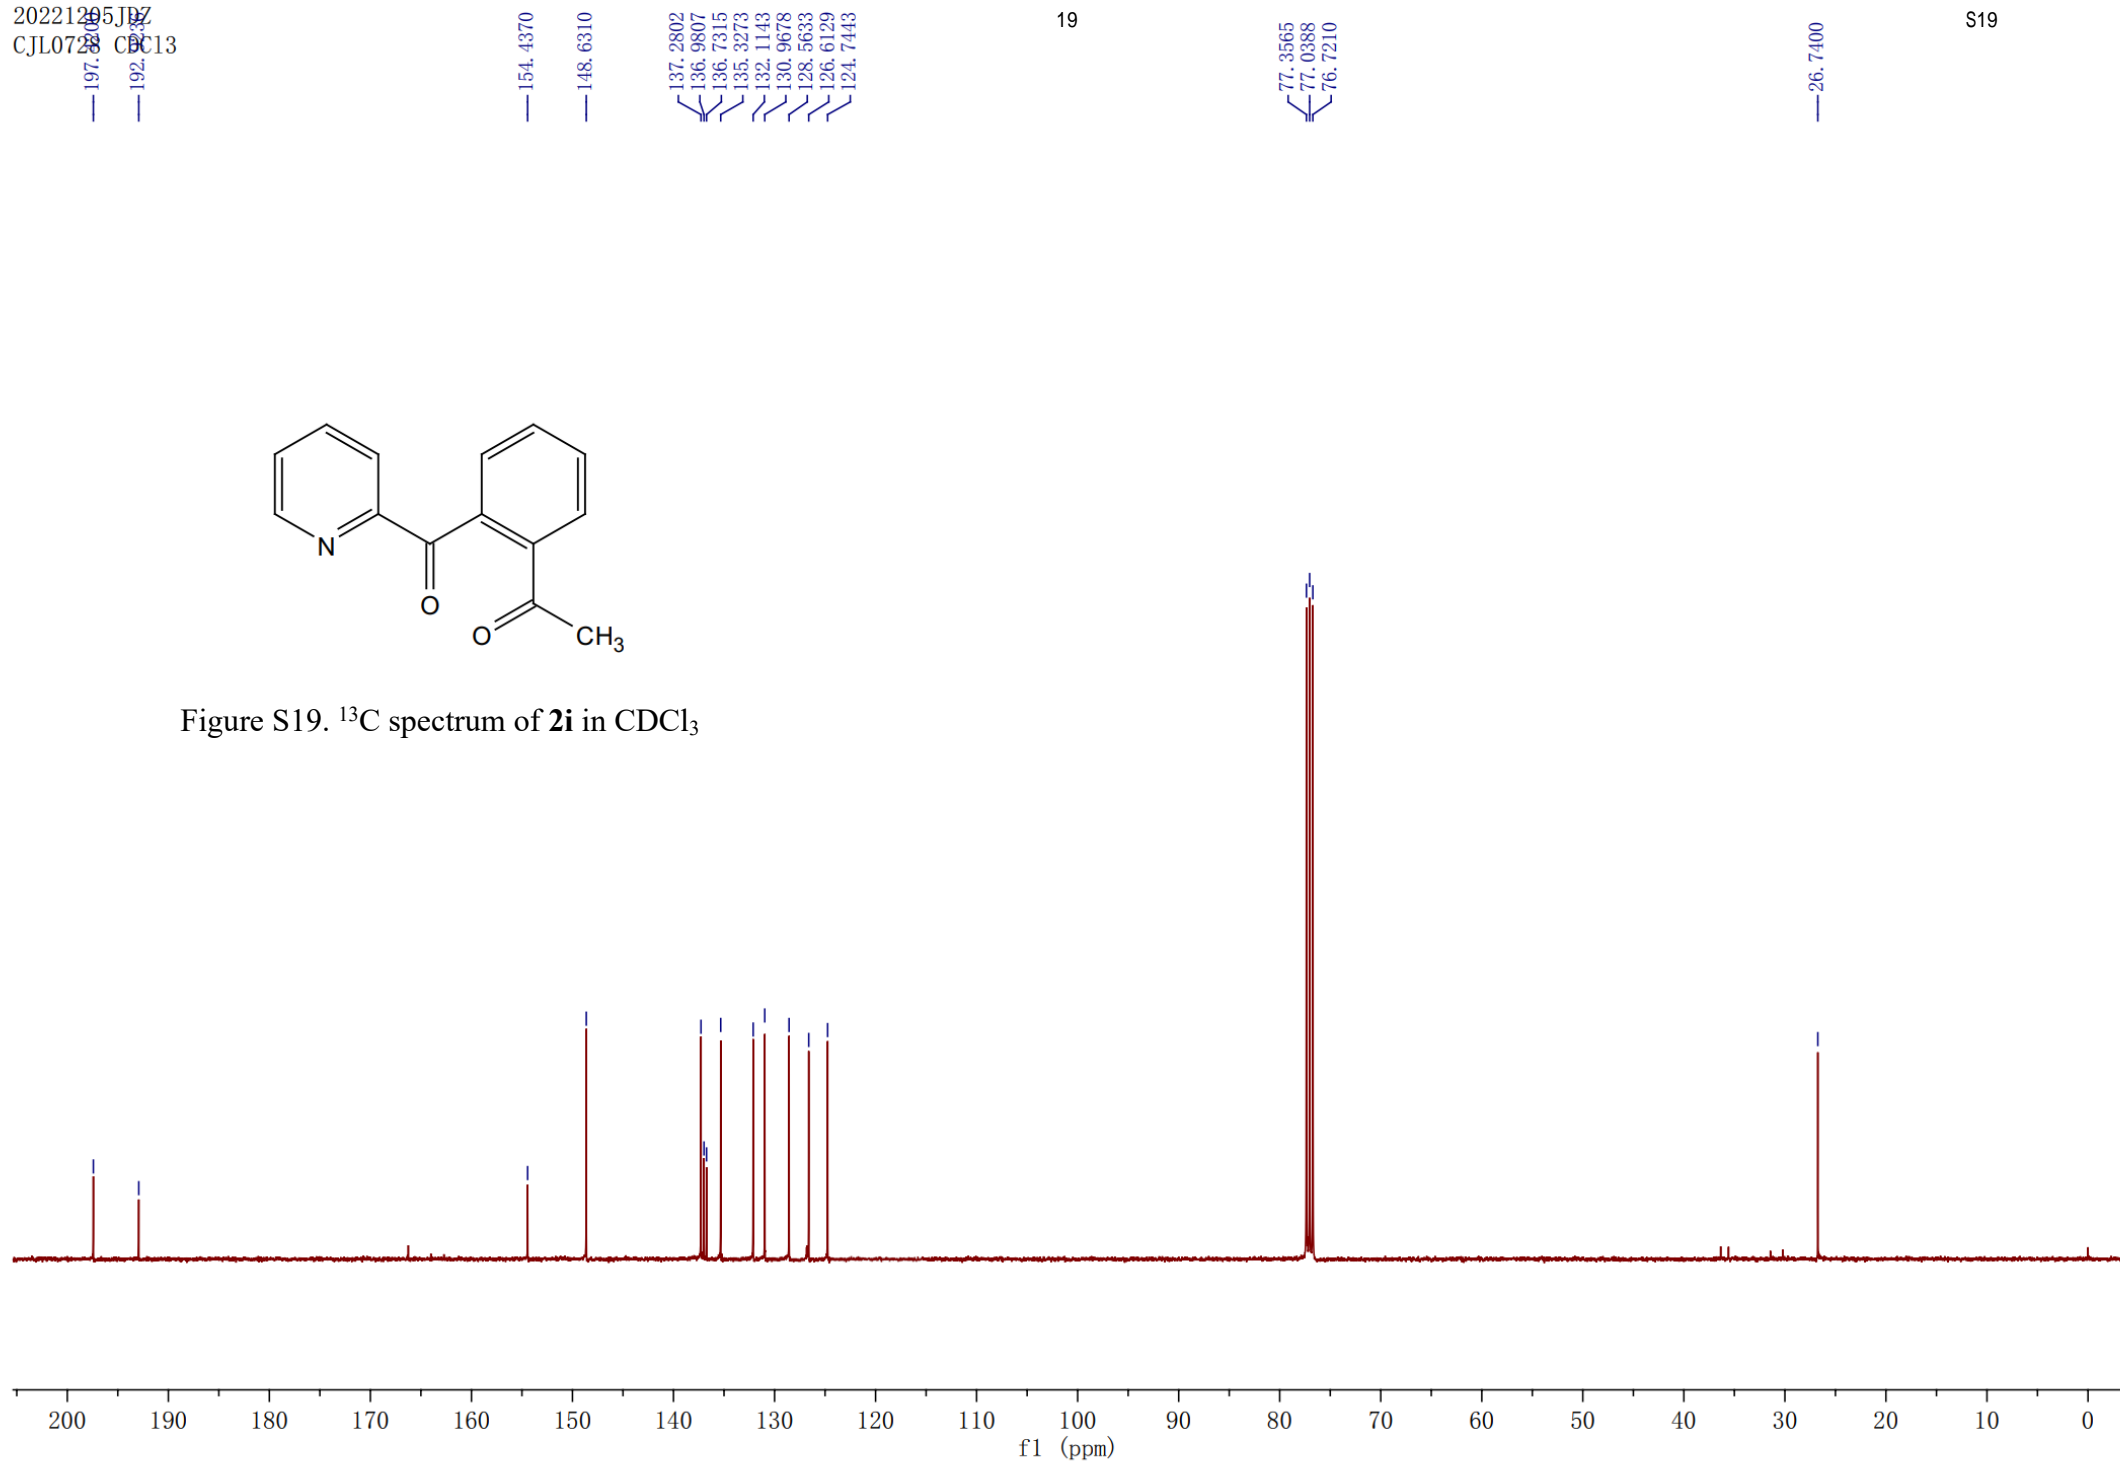

Figure S19. <sup>13</sup>C spectrum of **2i** in CDCl<sub>3</sub>

8.7589  
8.7471  
8.1654  
8.1599  
8.1501  
8.1340  
8.1312  
8.1146  
7.9537  
7.9494  
7.5591  
7.5472  
7.5442  
7.2819

3.9780

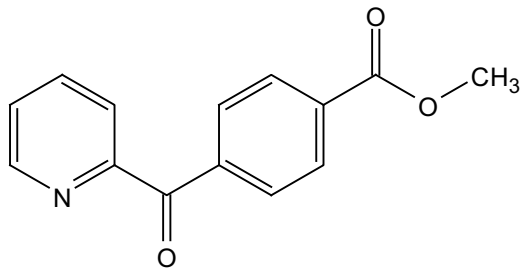

Figure S20. <sup>1</sup>H spectrum of **2j** in CDCl<sub>3</sub>

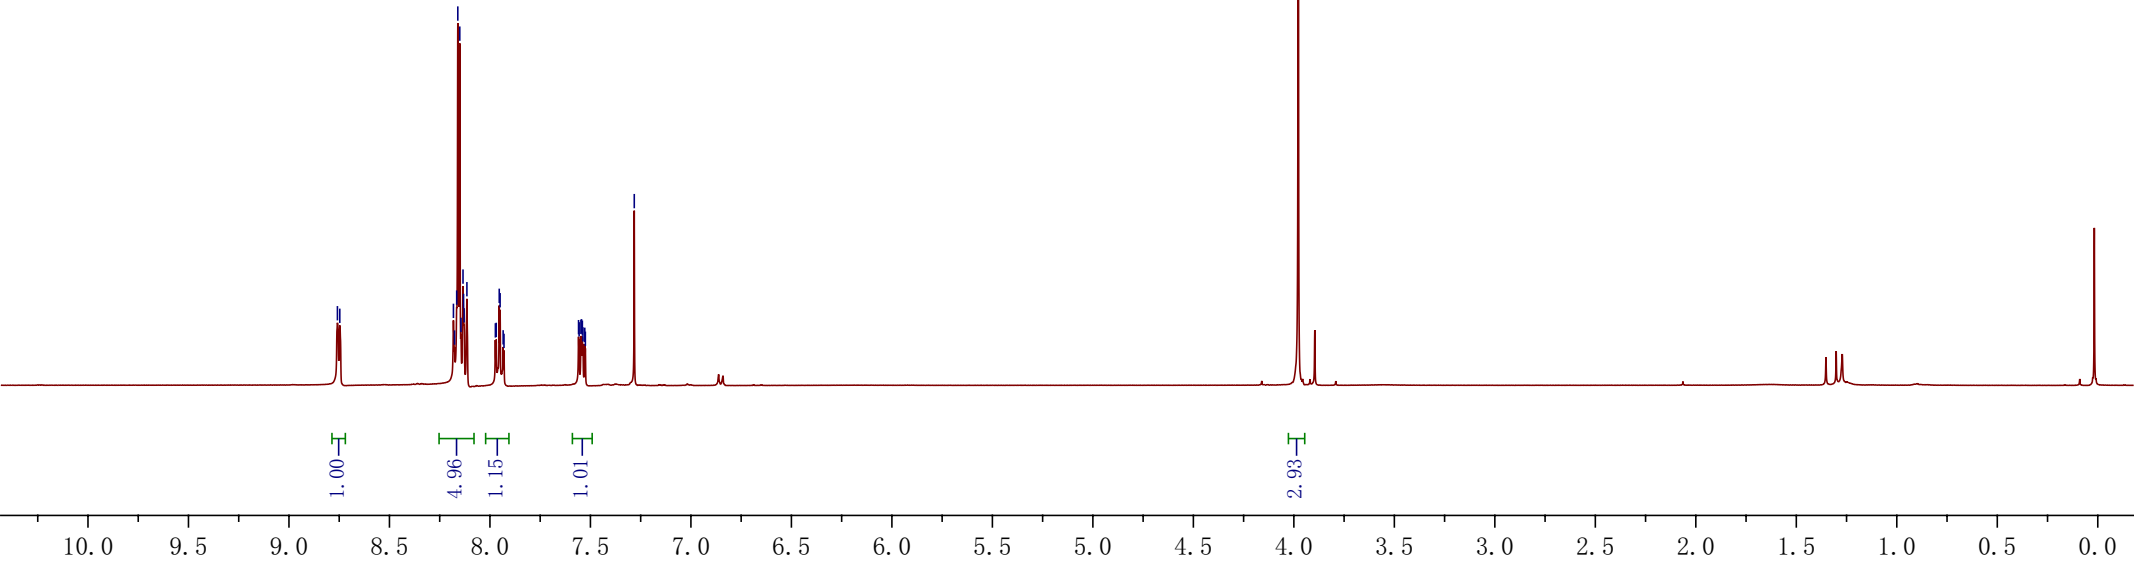

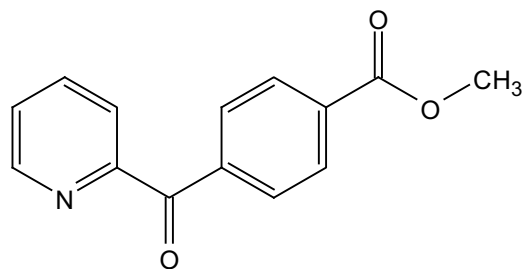

Figure S21.  $^{13}\text{C}$  spectrum of **2j** in  $\text{CDCl}_3$

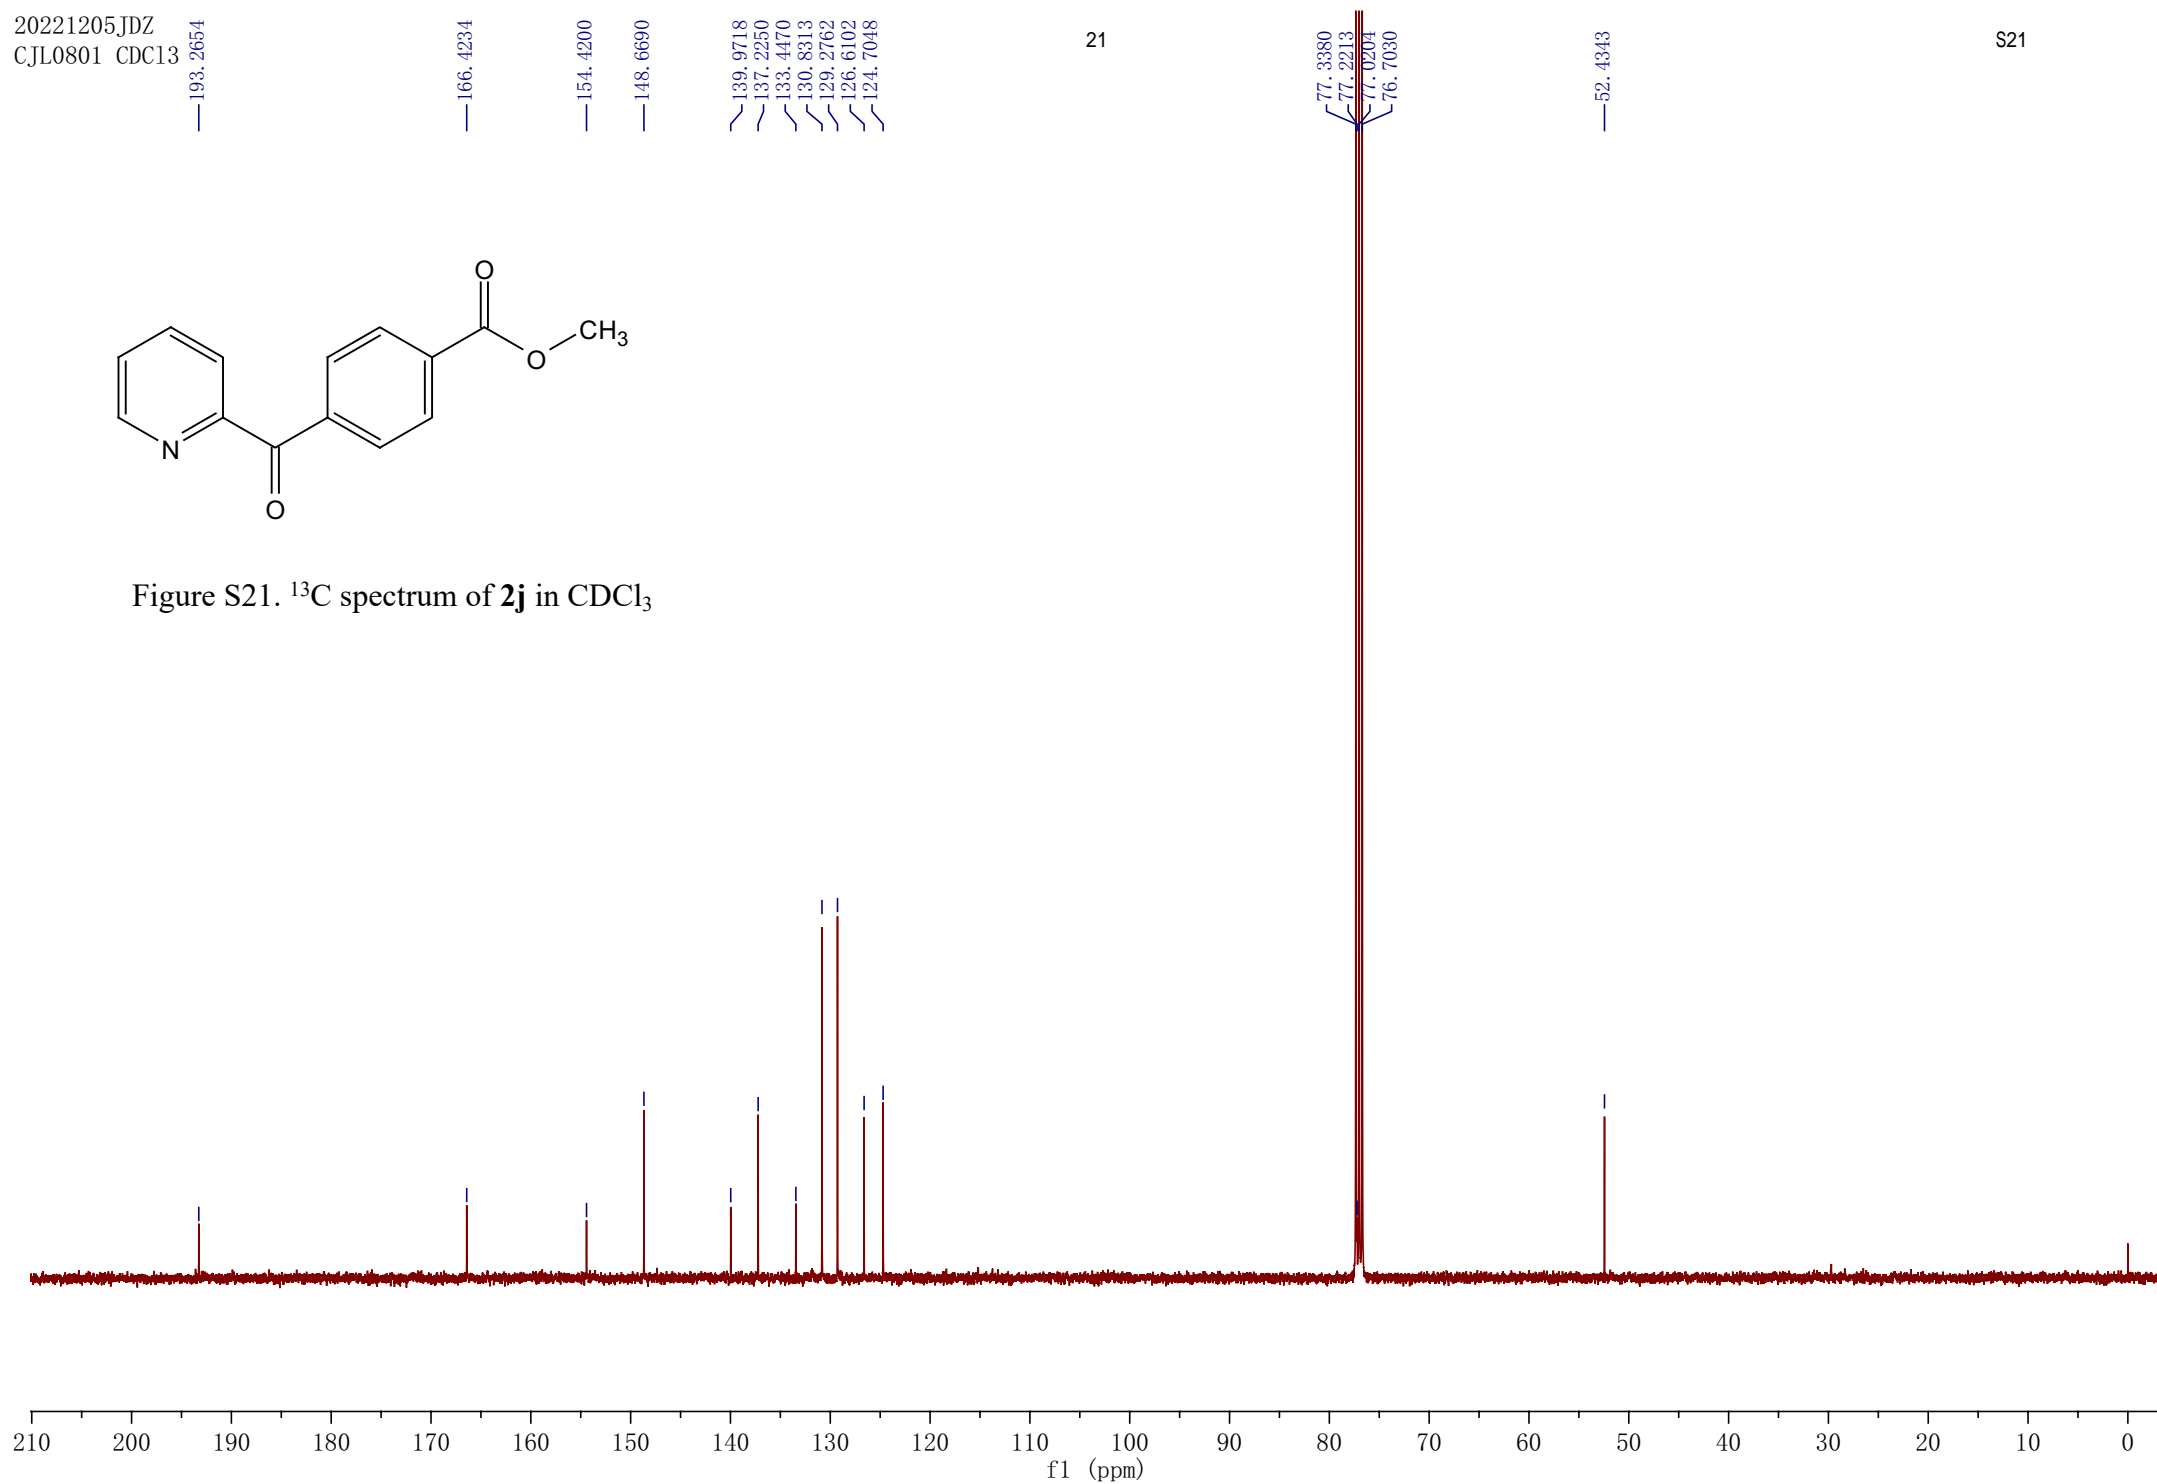

8.7675  
8.7569  
8.5080  
8.5044  
8.5011  
8.3962  
8.3764  
8.1808  
8.1611  
7.9785  
7.9743  
7.8940  
7.8747  
7.6507  
7.2821

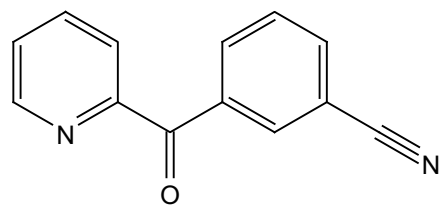

Figure S22.  $^1\text{H}$  spectrum of **2k** in  $\text{CDCl}_3$

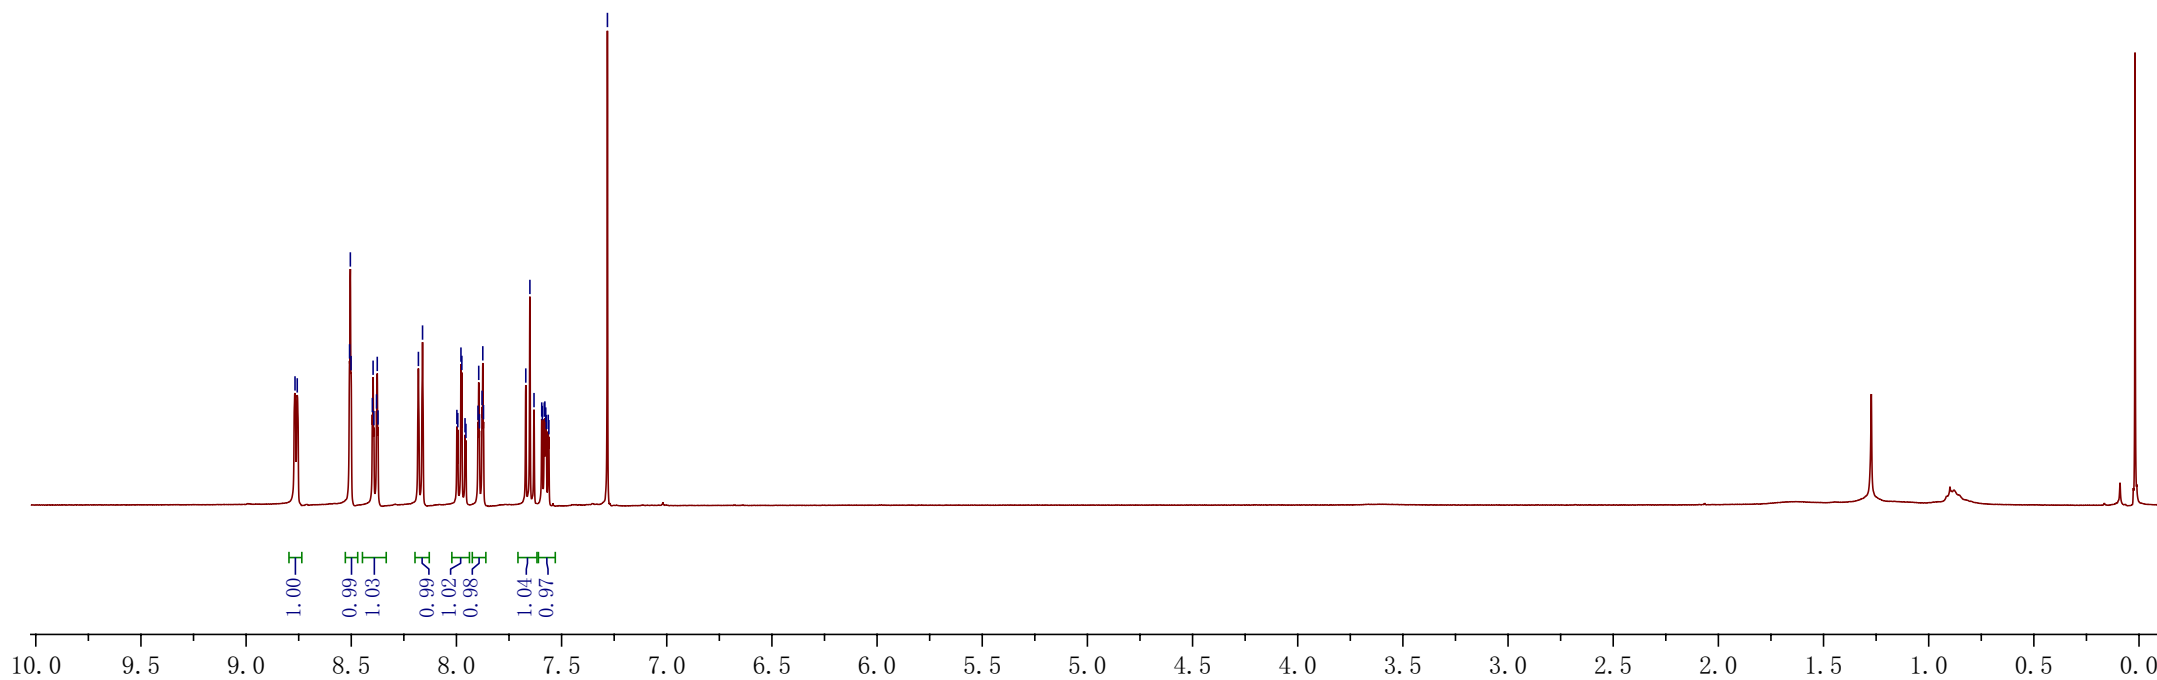

191.2240

153.7692

148.6548

137.4266

137.2203

135.5768

135.0479

134.9101

129.1031

126.9666

124.8411

118.2302

112.5022

23

77.3355

77.0180

76.7005

S23

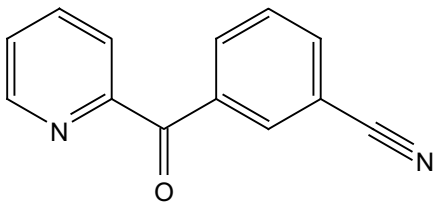

Figure S23. <sup>13</sup>C spectrum of **2k** in CDCl<sub>3</sub>

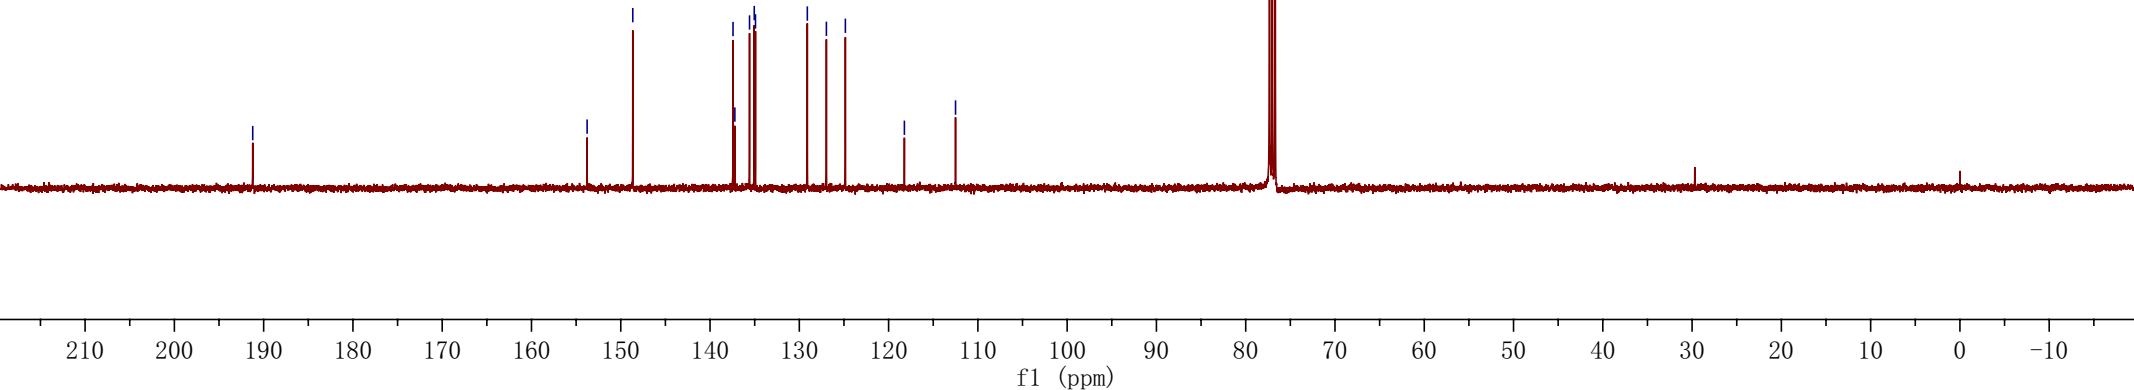

9.0326  
9.0280  
9.0237  
8.7814  
8.7797  
8.4889  
8.4851  
8.2128  
8.1932  
7.9945  
7.9903  
7.7412  
7.7214  
7.7013  
7.5926  
7.2824

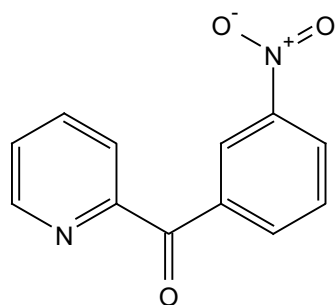

Figure S24.  $^1\text{H}$  spectrum of **2I** in  $\text{CDCl}_3$

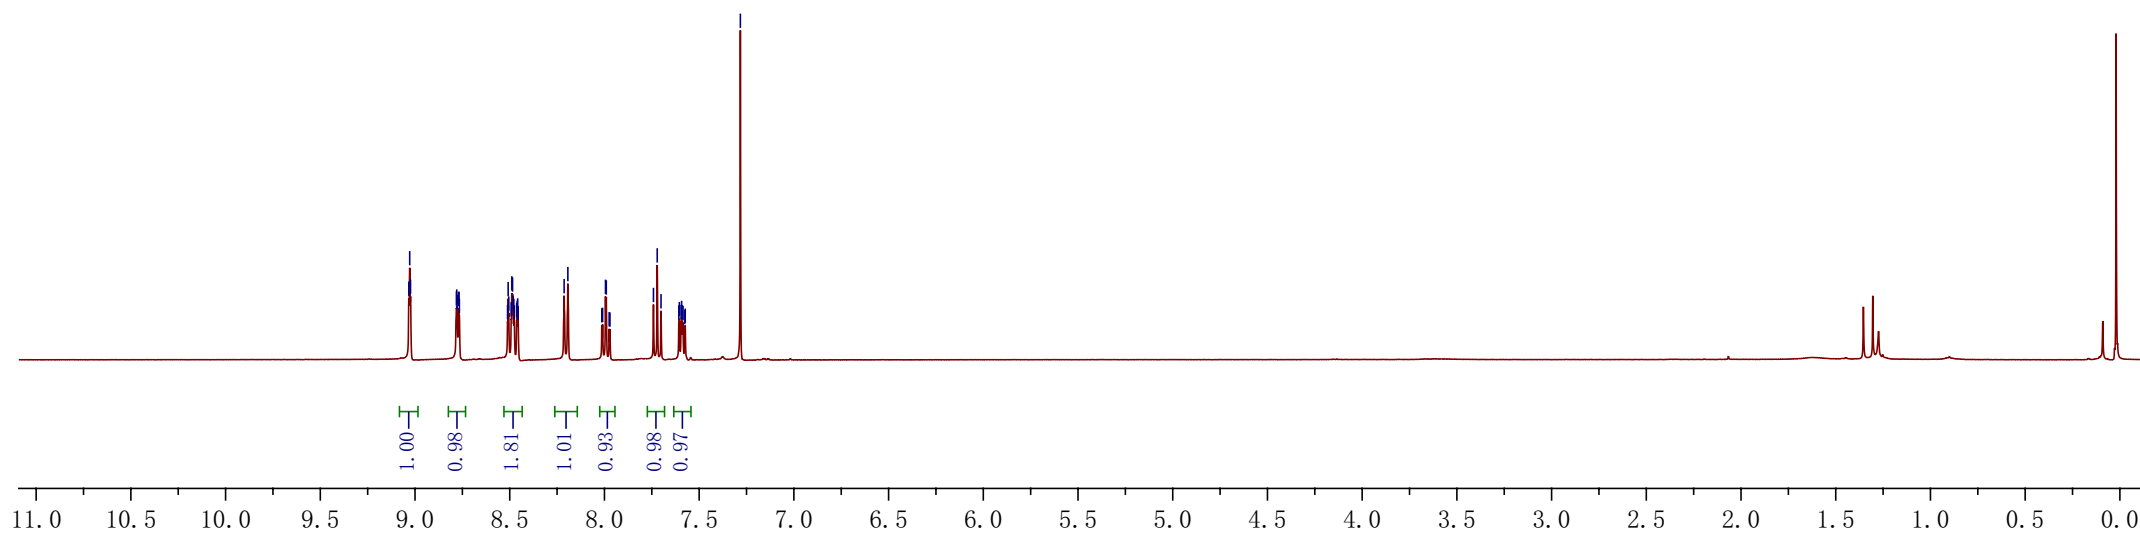

20221205JDZ  
CJL0705 CDCl3  
—191.0732

—153.6800  
—148.7131  
—147.9103  
—137.6754  
—137.4694  
—136.5606  
—129.2679  
—127.0535  
—126.9708  
—126.2444  
—124.8708

25

77.3376  
77.0198  
76.7019

S25

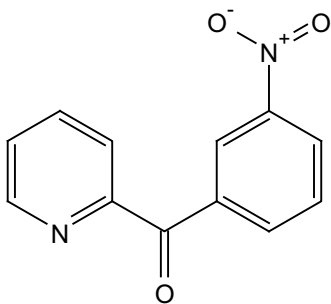

Figure S25. <sup>13</sup>C spectrum of **2l** in CDCl<sub>3</sub>

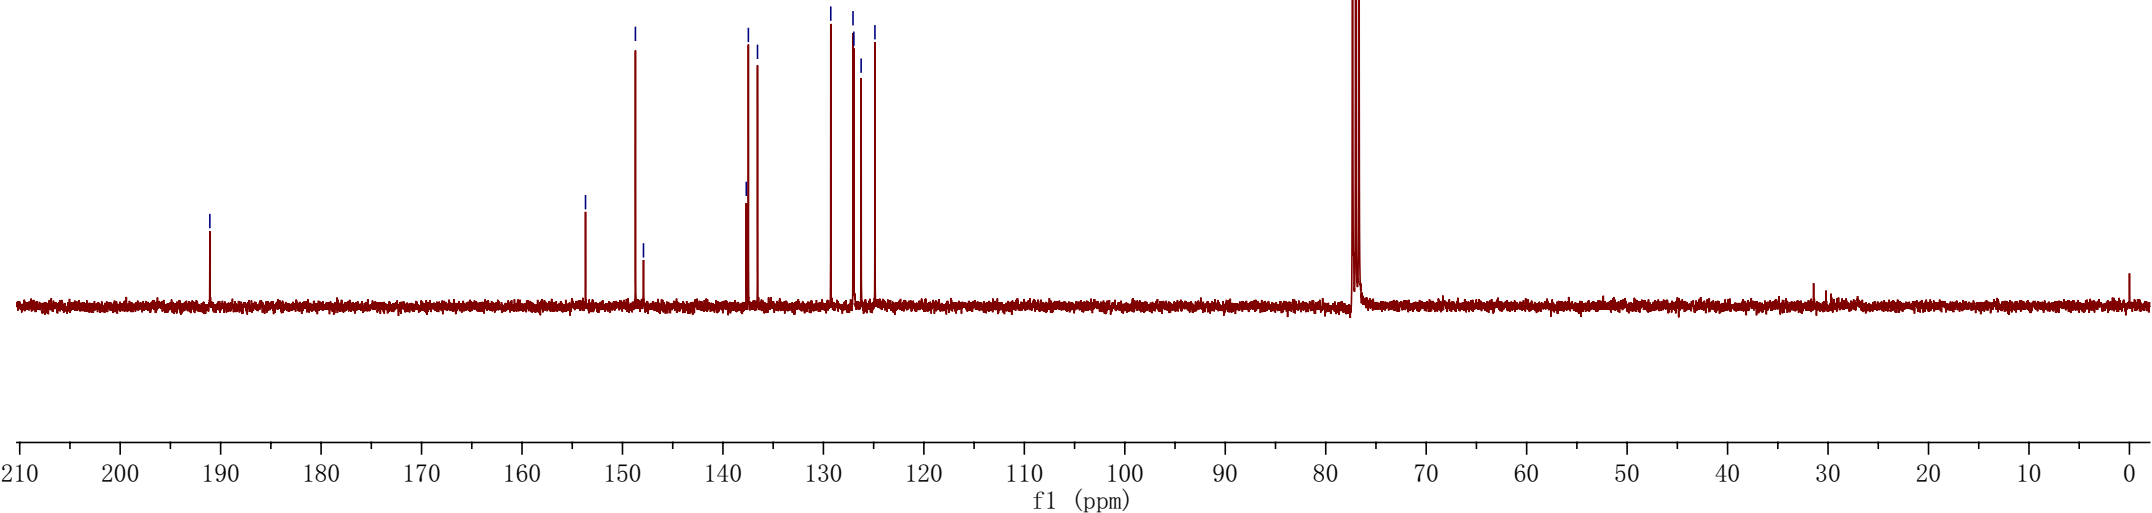

8.7694  
8.7674  
8.7655  
8.7634  
8.7576  
8.7555  
8.7537  
8.7516  
8.4154  
8.4087  
8.1994  
8.1797  
7.7718  
7.7687  
7.7594  
7.7564  
7.5126  
7.5096  
7.2814  
7.2119  
7.2022  
7.1996  
7.1899

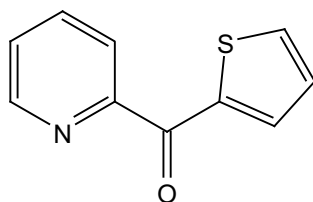

Figure S26.  $^1\text{H}$  spectrum of **2m** in  $\text{CDCl}_3$

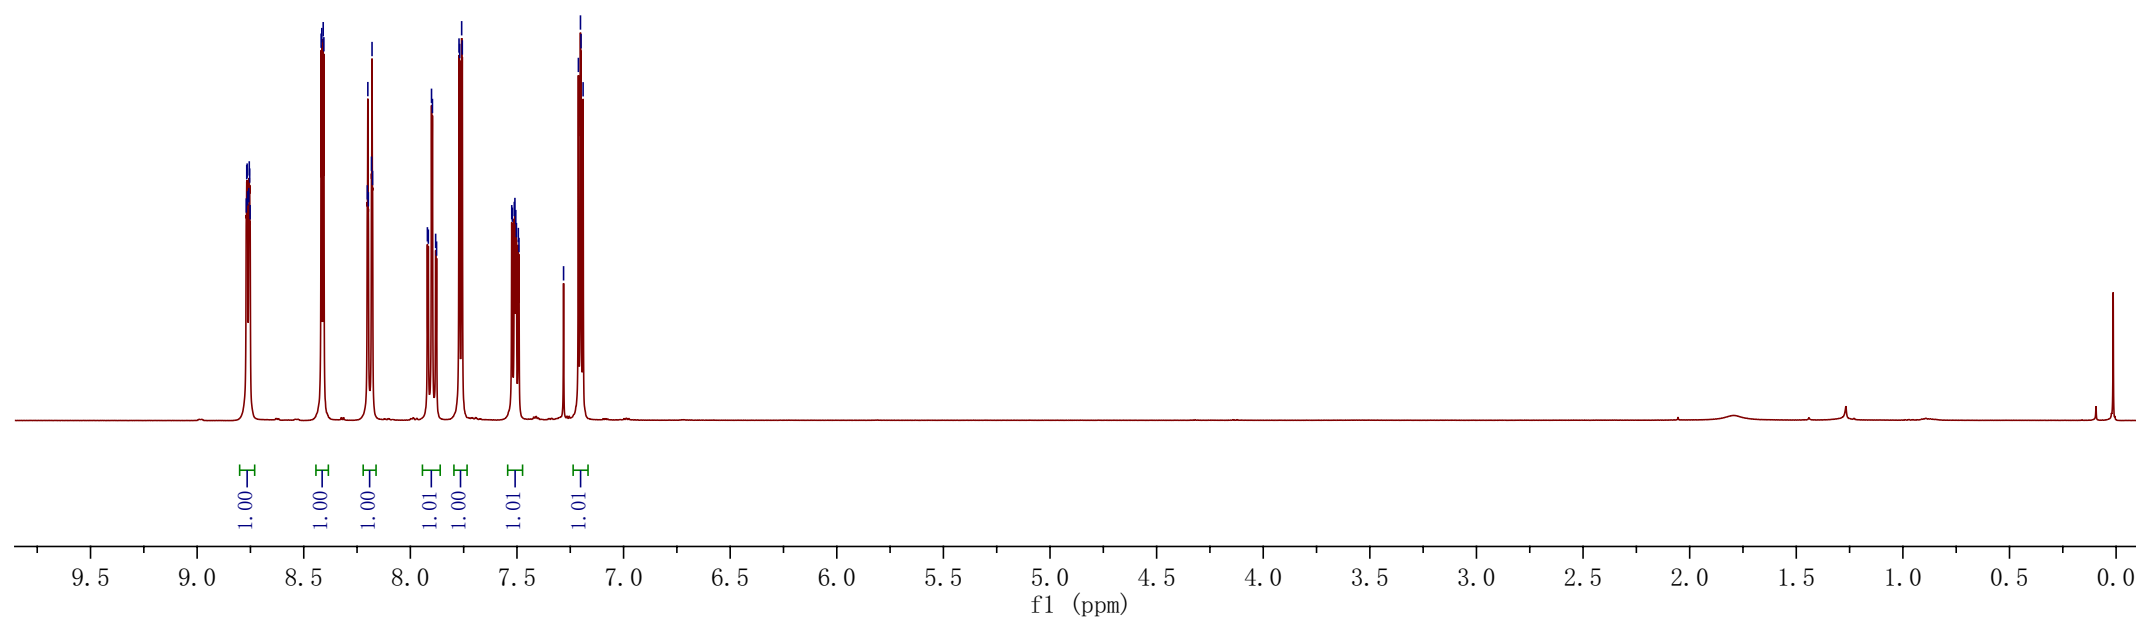



183.5436

154.0169

148.2598

140.0115

137.0986

136.6988

136.3153

127.5908

126.6786

123.7974

27

77.3668

77.0492

76.7315

S27

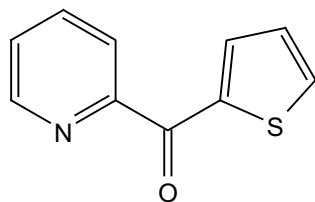

Figure S27. <sup>13</sup>C spectrum of **2m** in CDCl<sub>3</sub>

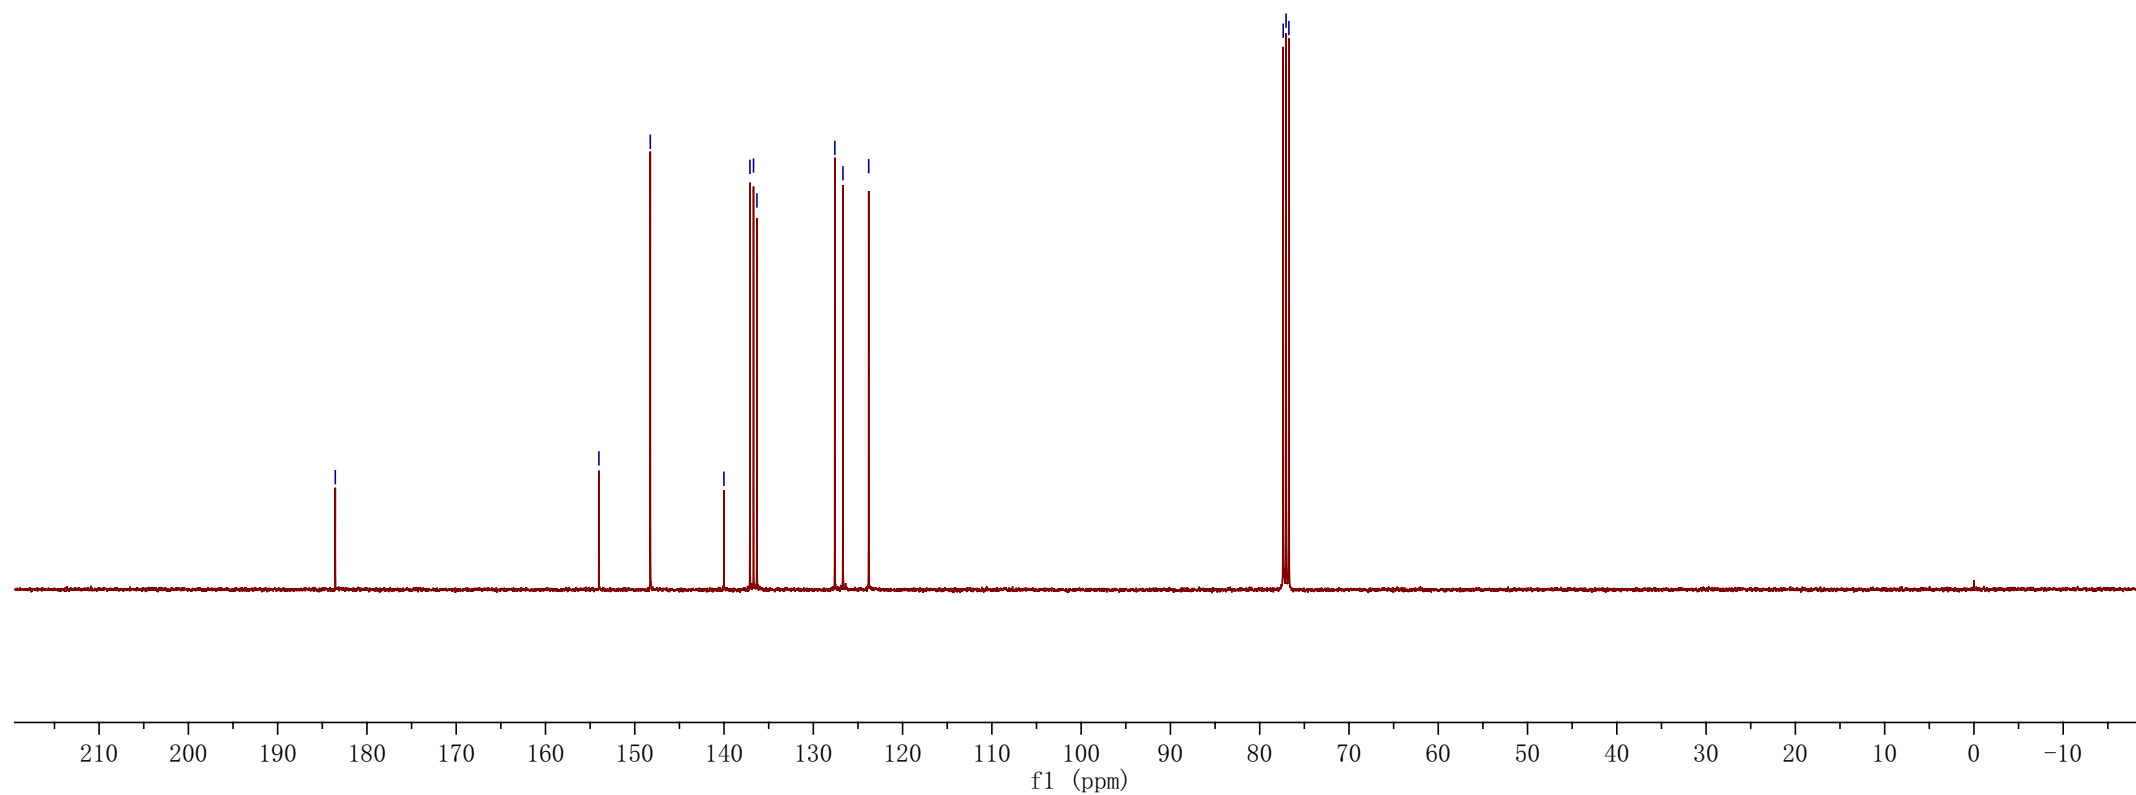

8.8570  
 8.8463  
 8.3780  
 8.3584  
 8.2218  
 8.2143  
 7.9648  
 7.9607  
 7.8043  
 7.7968  
 7.6014  
 7.5922  
 7.5894  
 7.2820

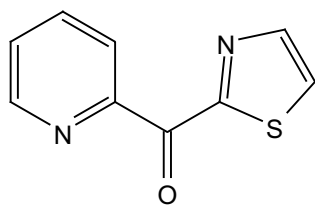

Figure S28.  $^1\text{H}$  spectrum of **2n** in  $\text{CDCl}_3$

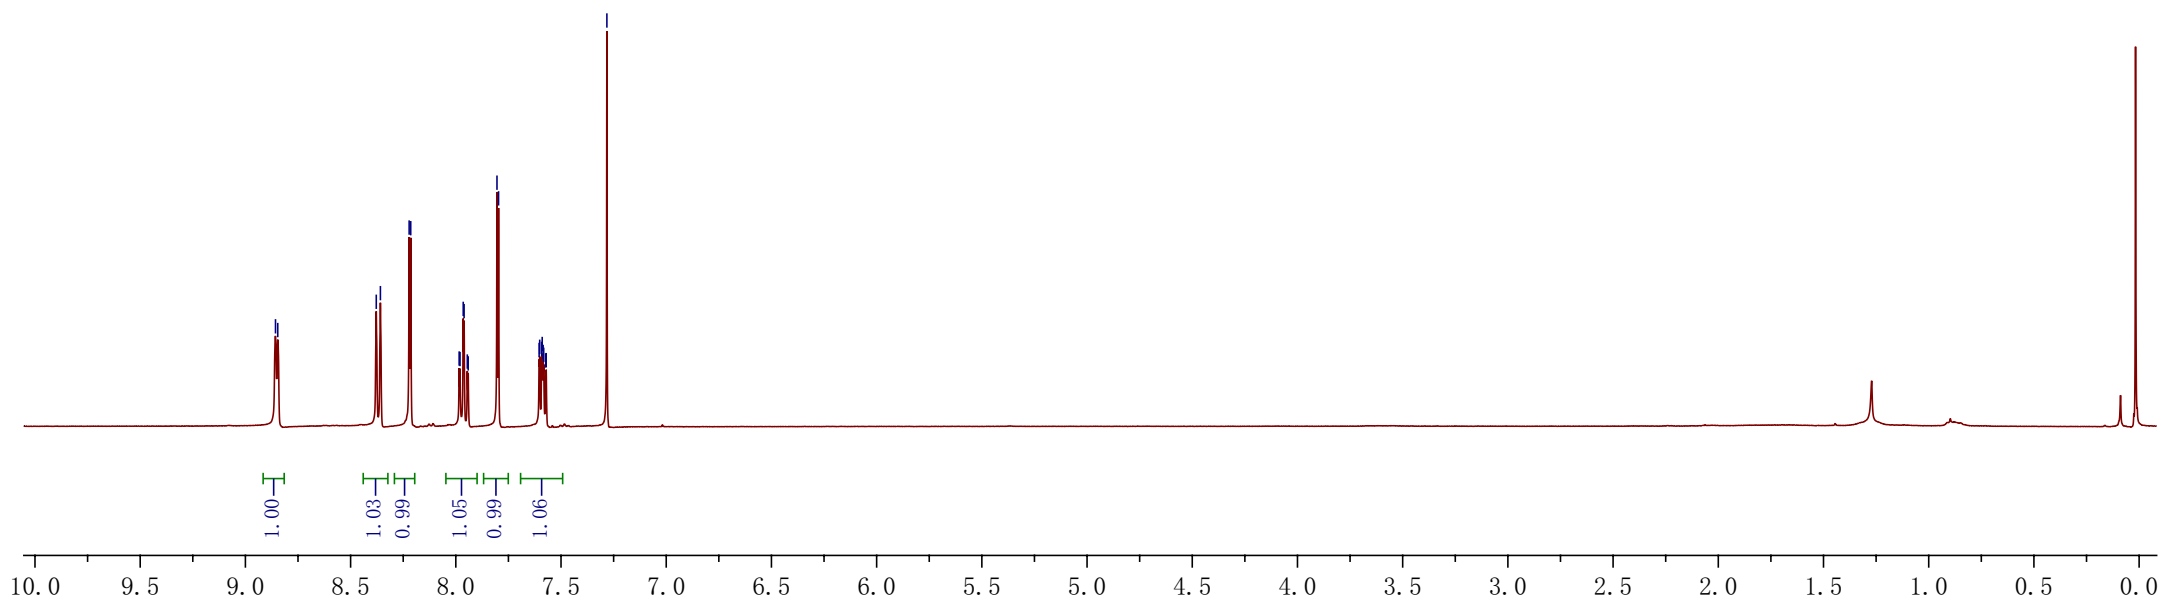

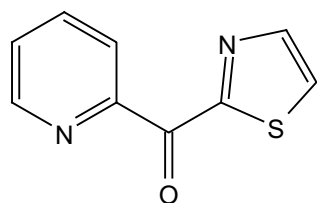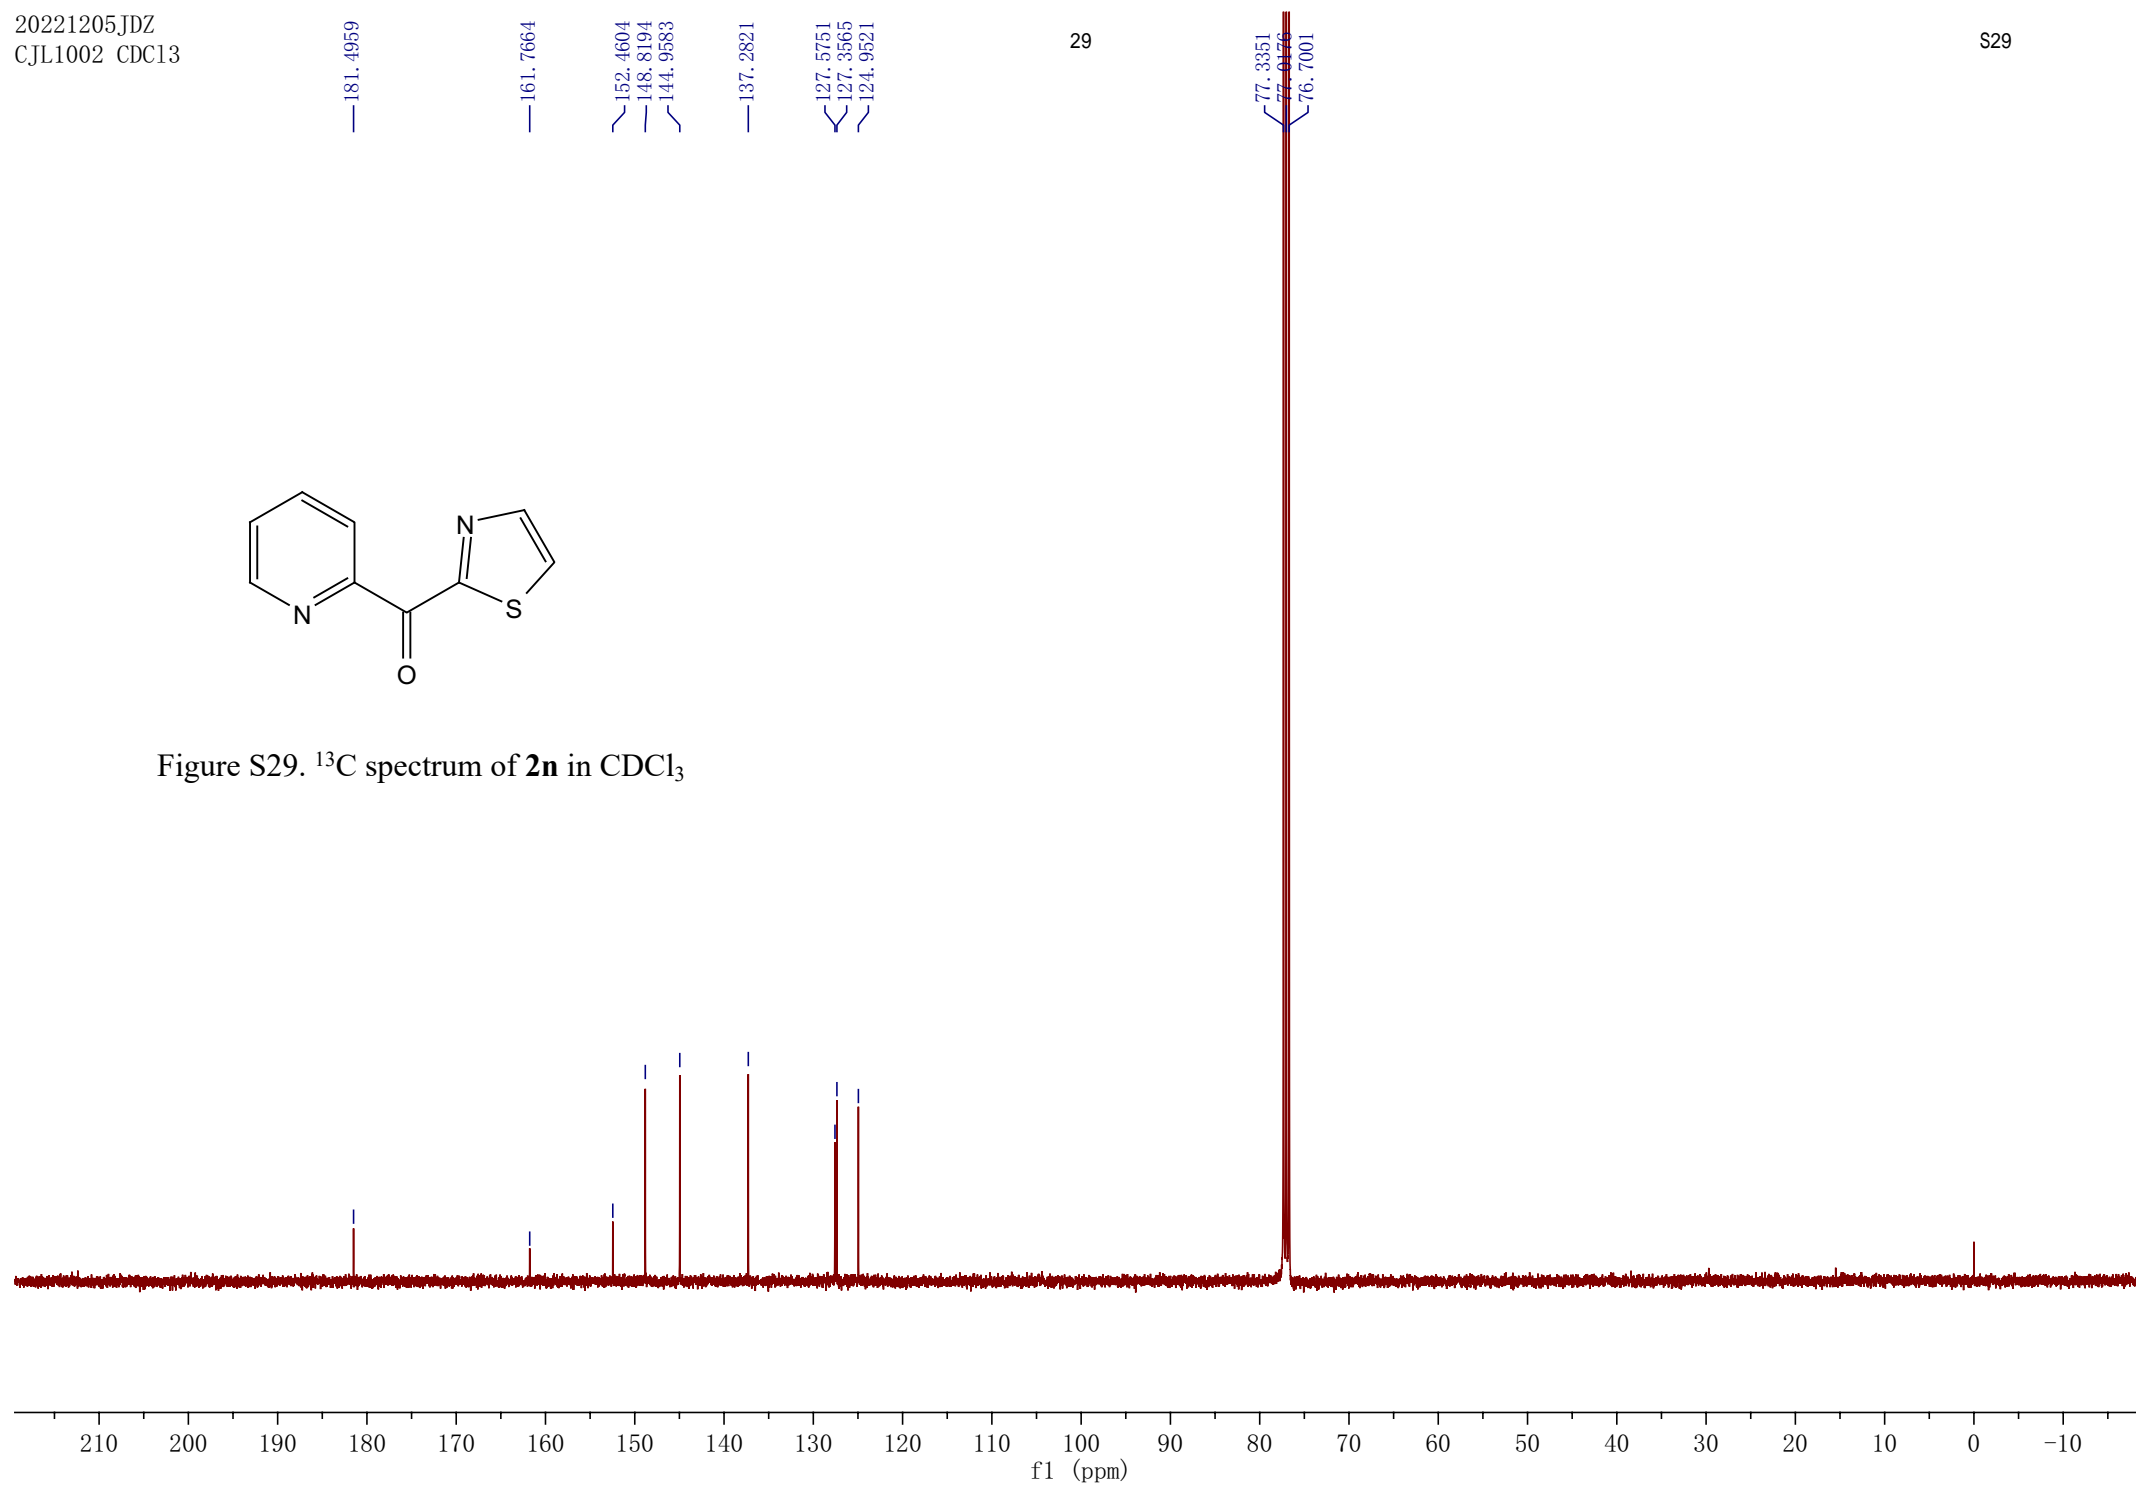

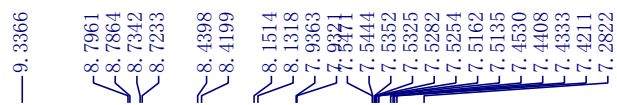

Figure S30. <sup>1</sup>H spectrum of **20** in CDCl<sub>3</sub>

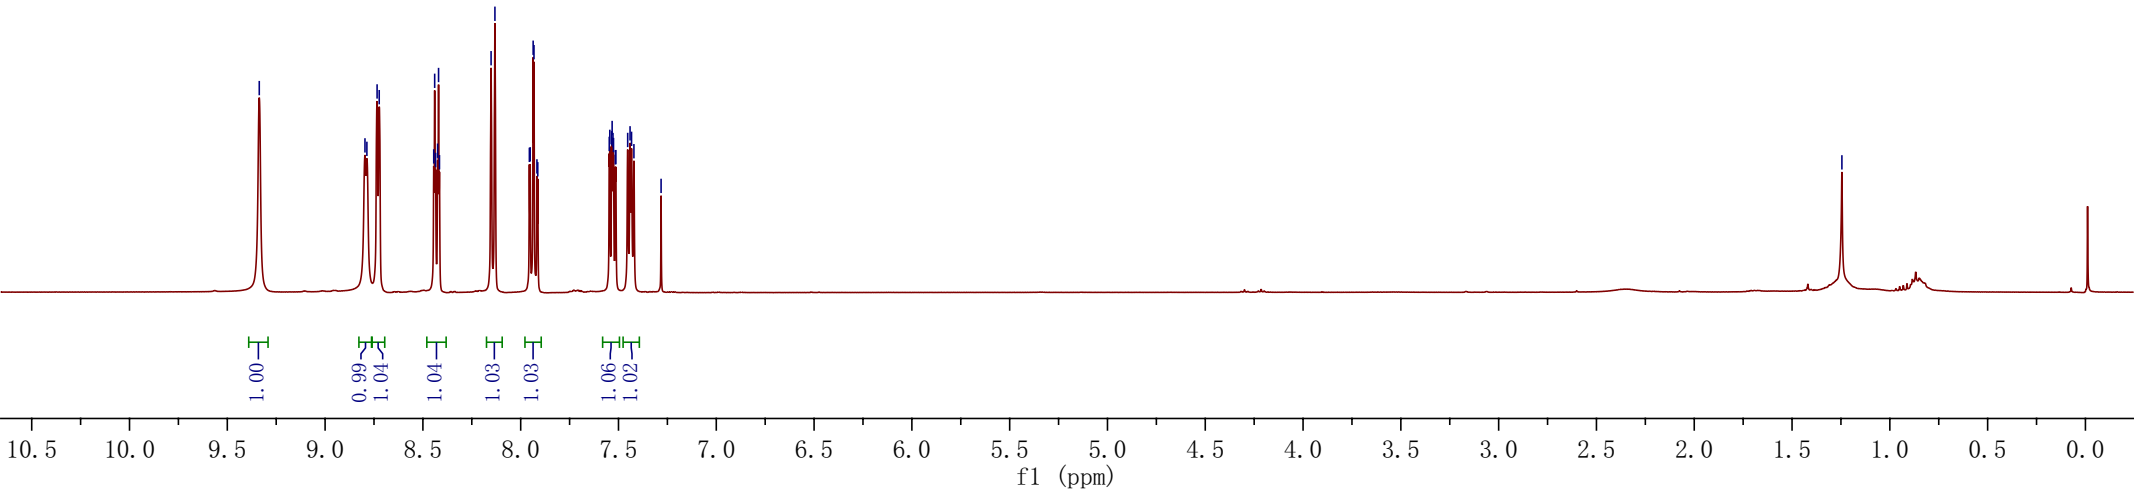

192.0858

20231009ZM  
CJL231003 CDC13

153.9676

152.8340

152.1749

148.6444

138.2443

137.2913

132.0128

126.8503

124.5520

123.0527

31

77.3847

77.0668

76.7490

S31

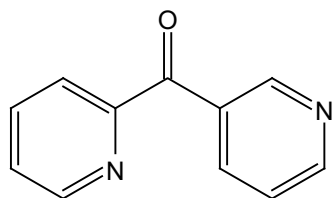Figure S31.  $^1\text{H}$  spectrum of **2o** in  $\text{CDCl}_3$ 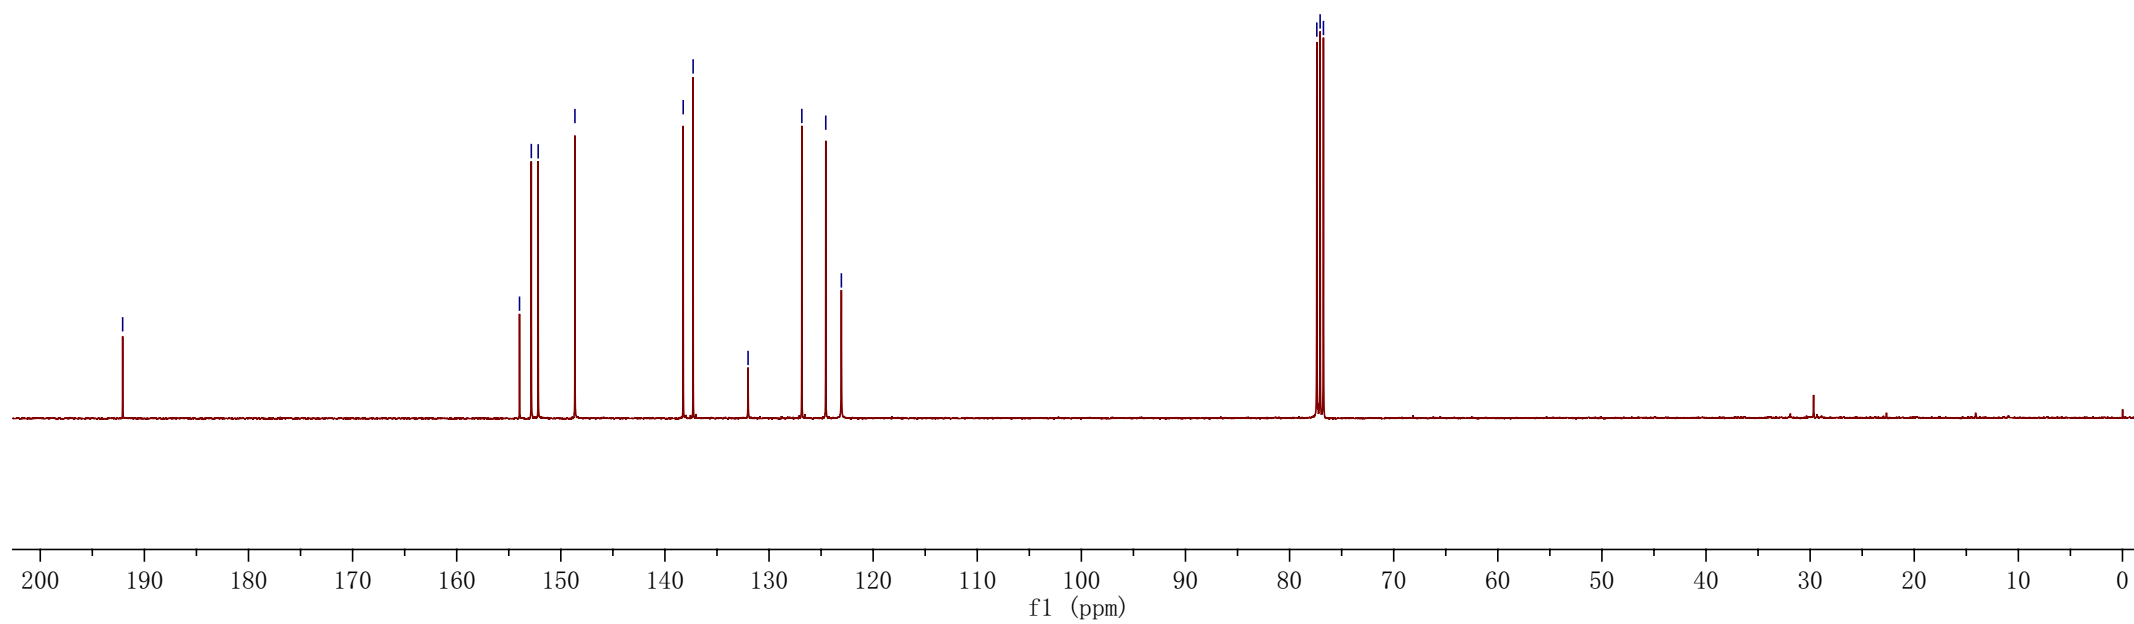

8.8452  
 8.8335  
 7.8536  
 7.8349  
 7.6899  
 7.6716  
 7.6528  
 7.6141  
 7.5996  
 7.5597  
 7.5403  
 7.5210  
 7.2819

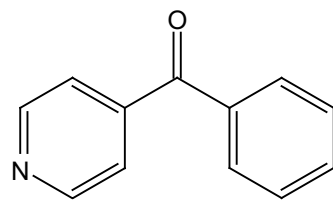

Figure S32.  $^1\text{H}$  spectrum of **2p** in  $\text{CDCl}_3$

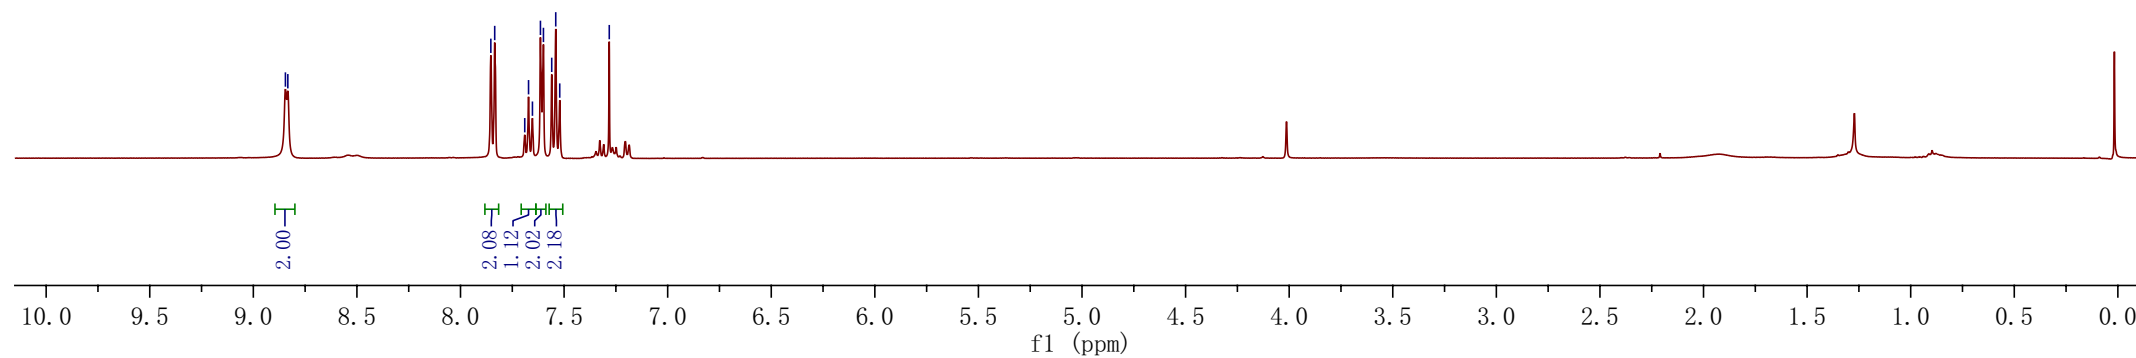

— 195.1838

20231103zm  
cjl-1030-1

— 150.3717

— 144.4062

— 135.9193

— 133.5538

— 130.1535

— 128.8684

— 128.6718

— 122.8942

33

77.3428  
77.0252  
76.7077

S33

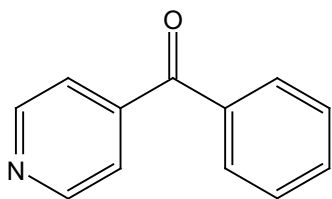Figure S33.  $^{13}\text{C}$  spectrum of **2p** in  $\text{CDCl}_3$ 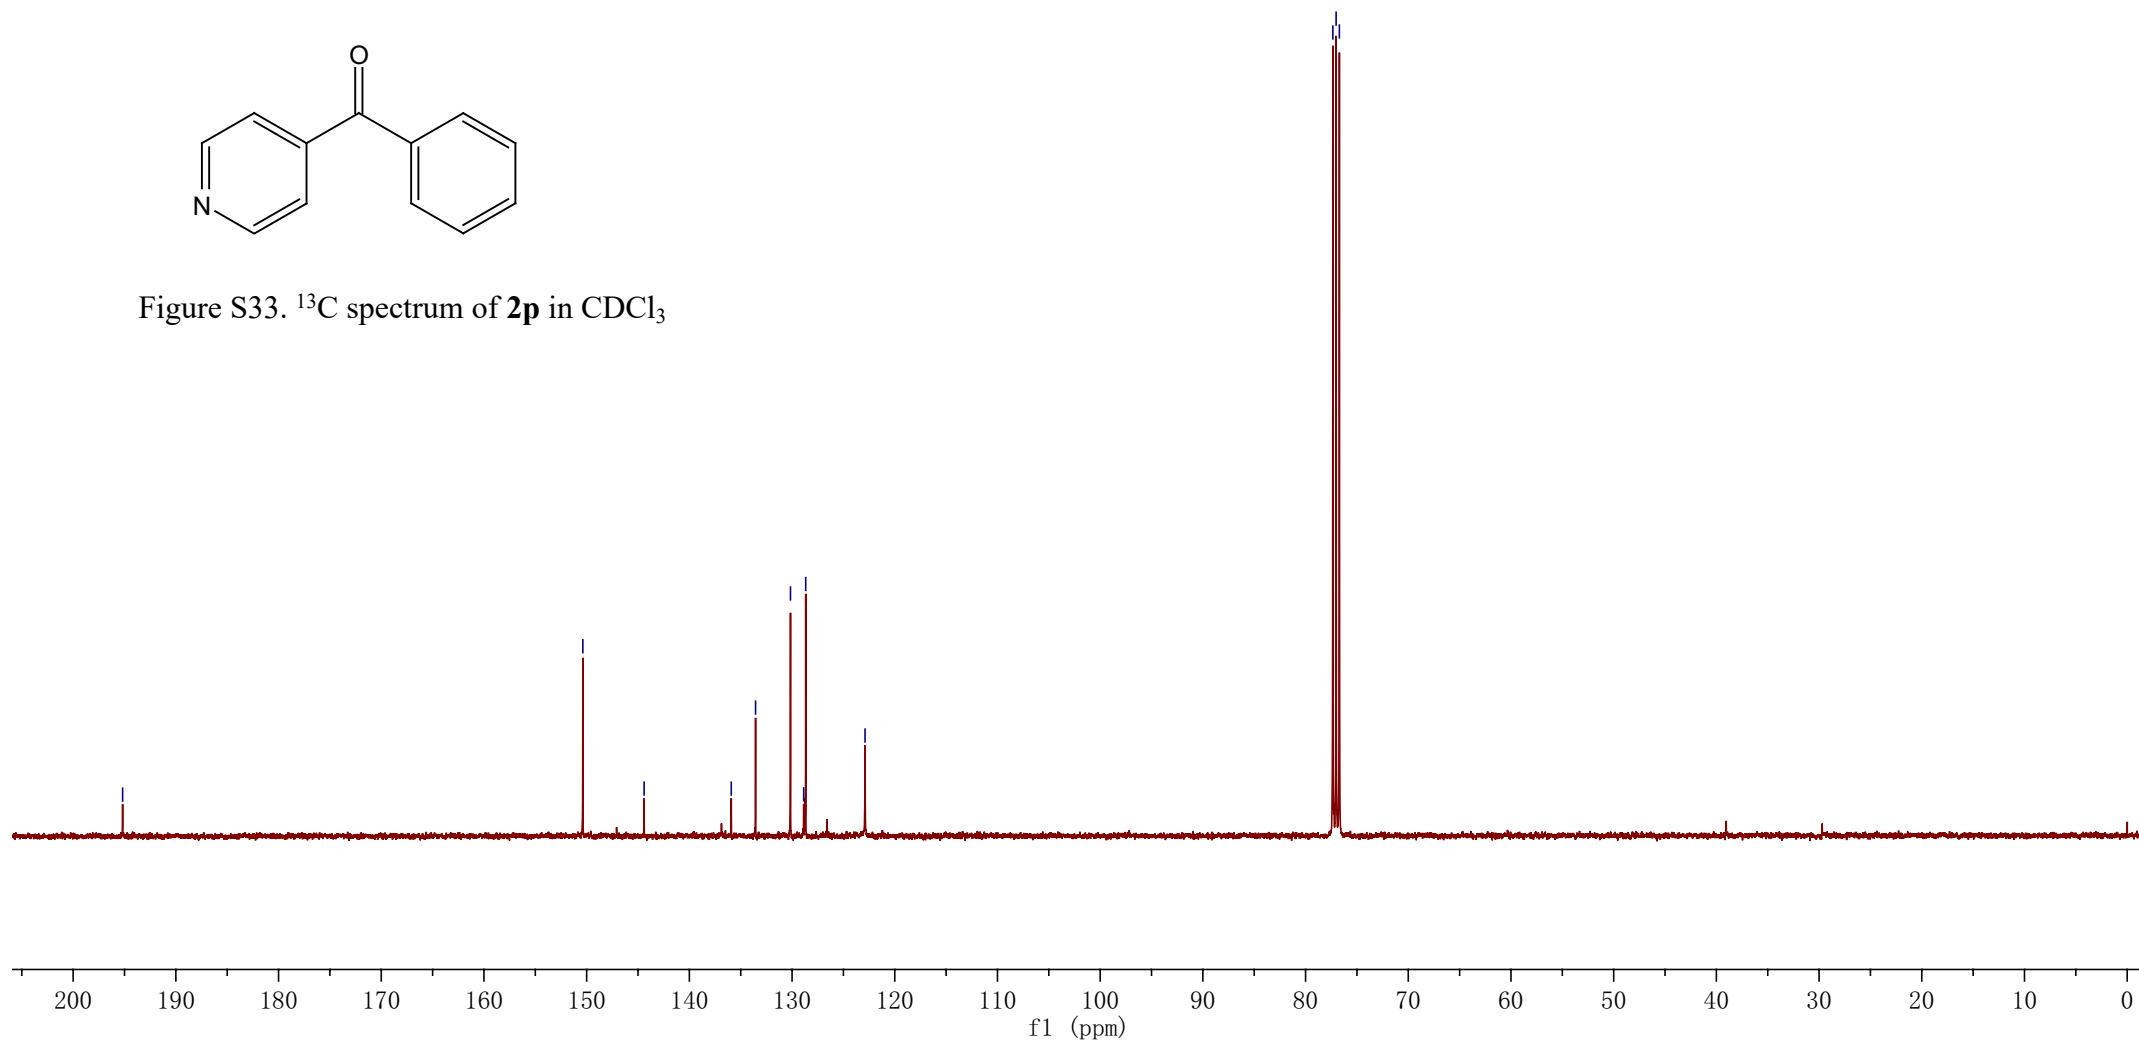

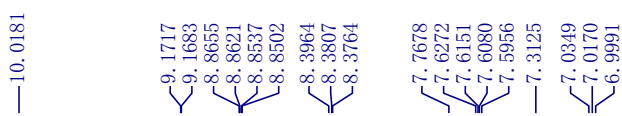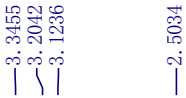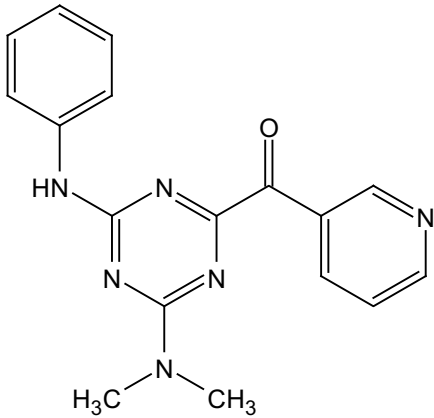

Figure S34. <sup>1</sup>H spectrum of **2r** in DMSO-*d*<sub>6</sub>

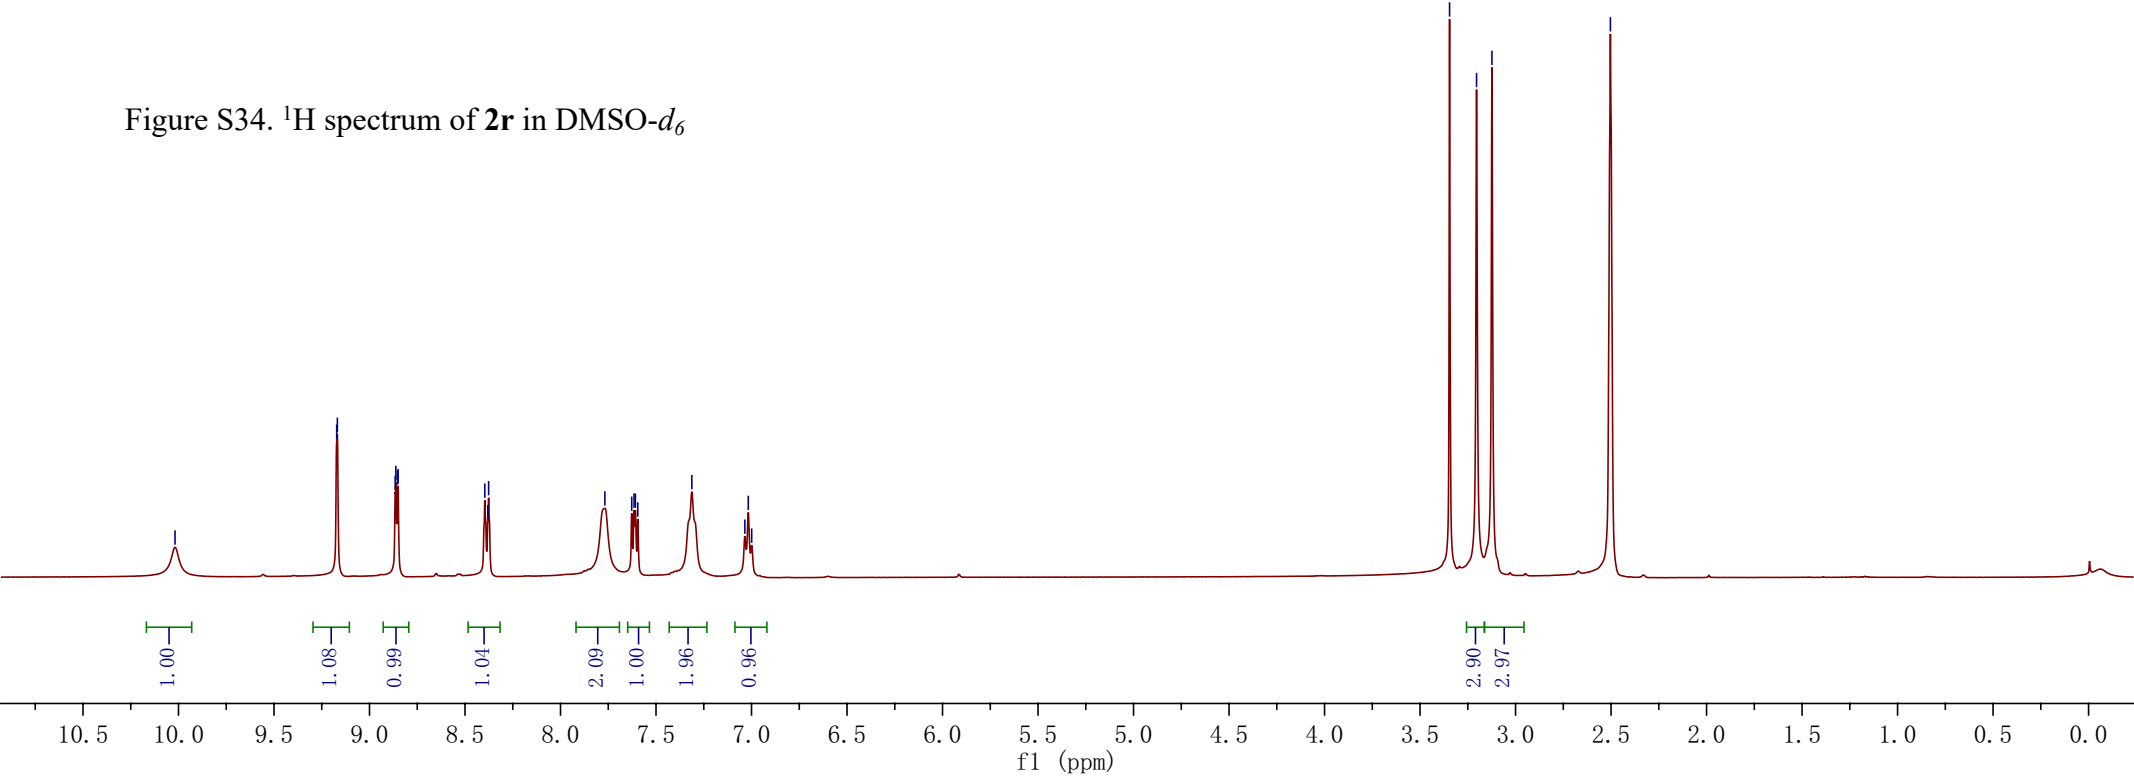



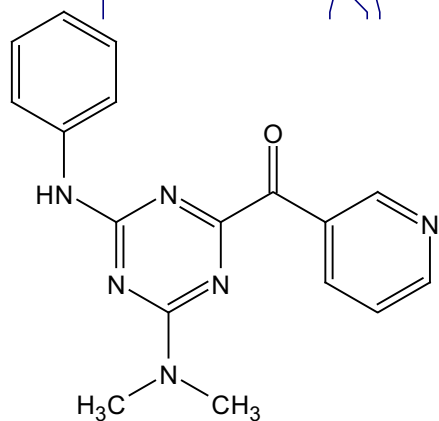

35

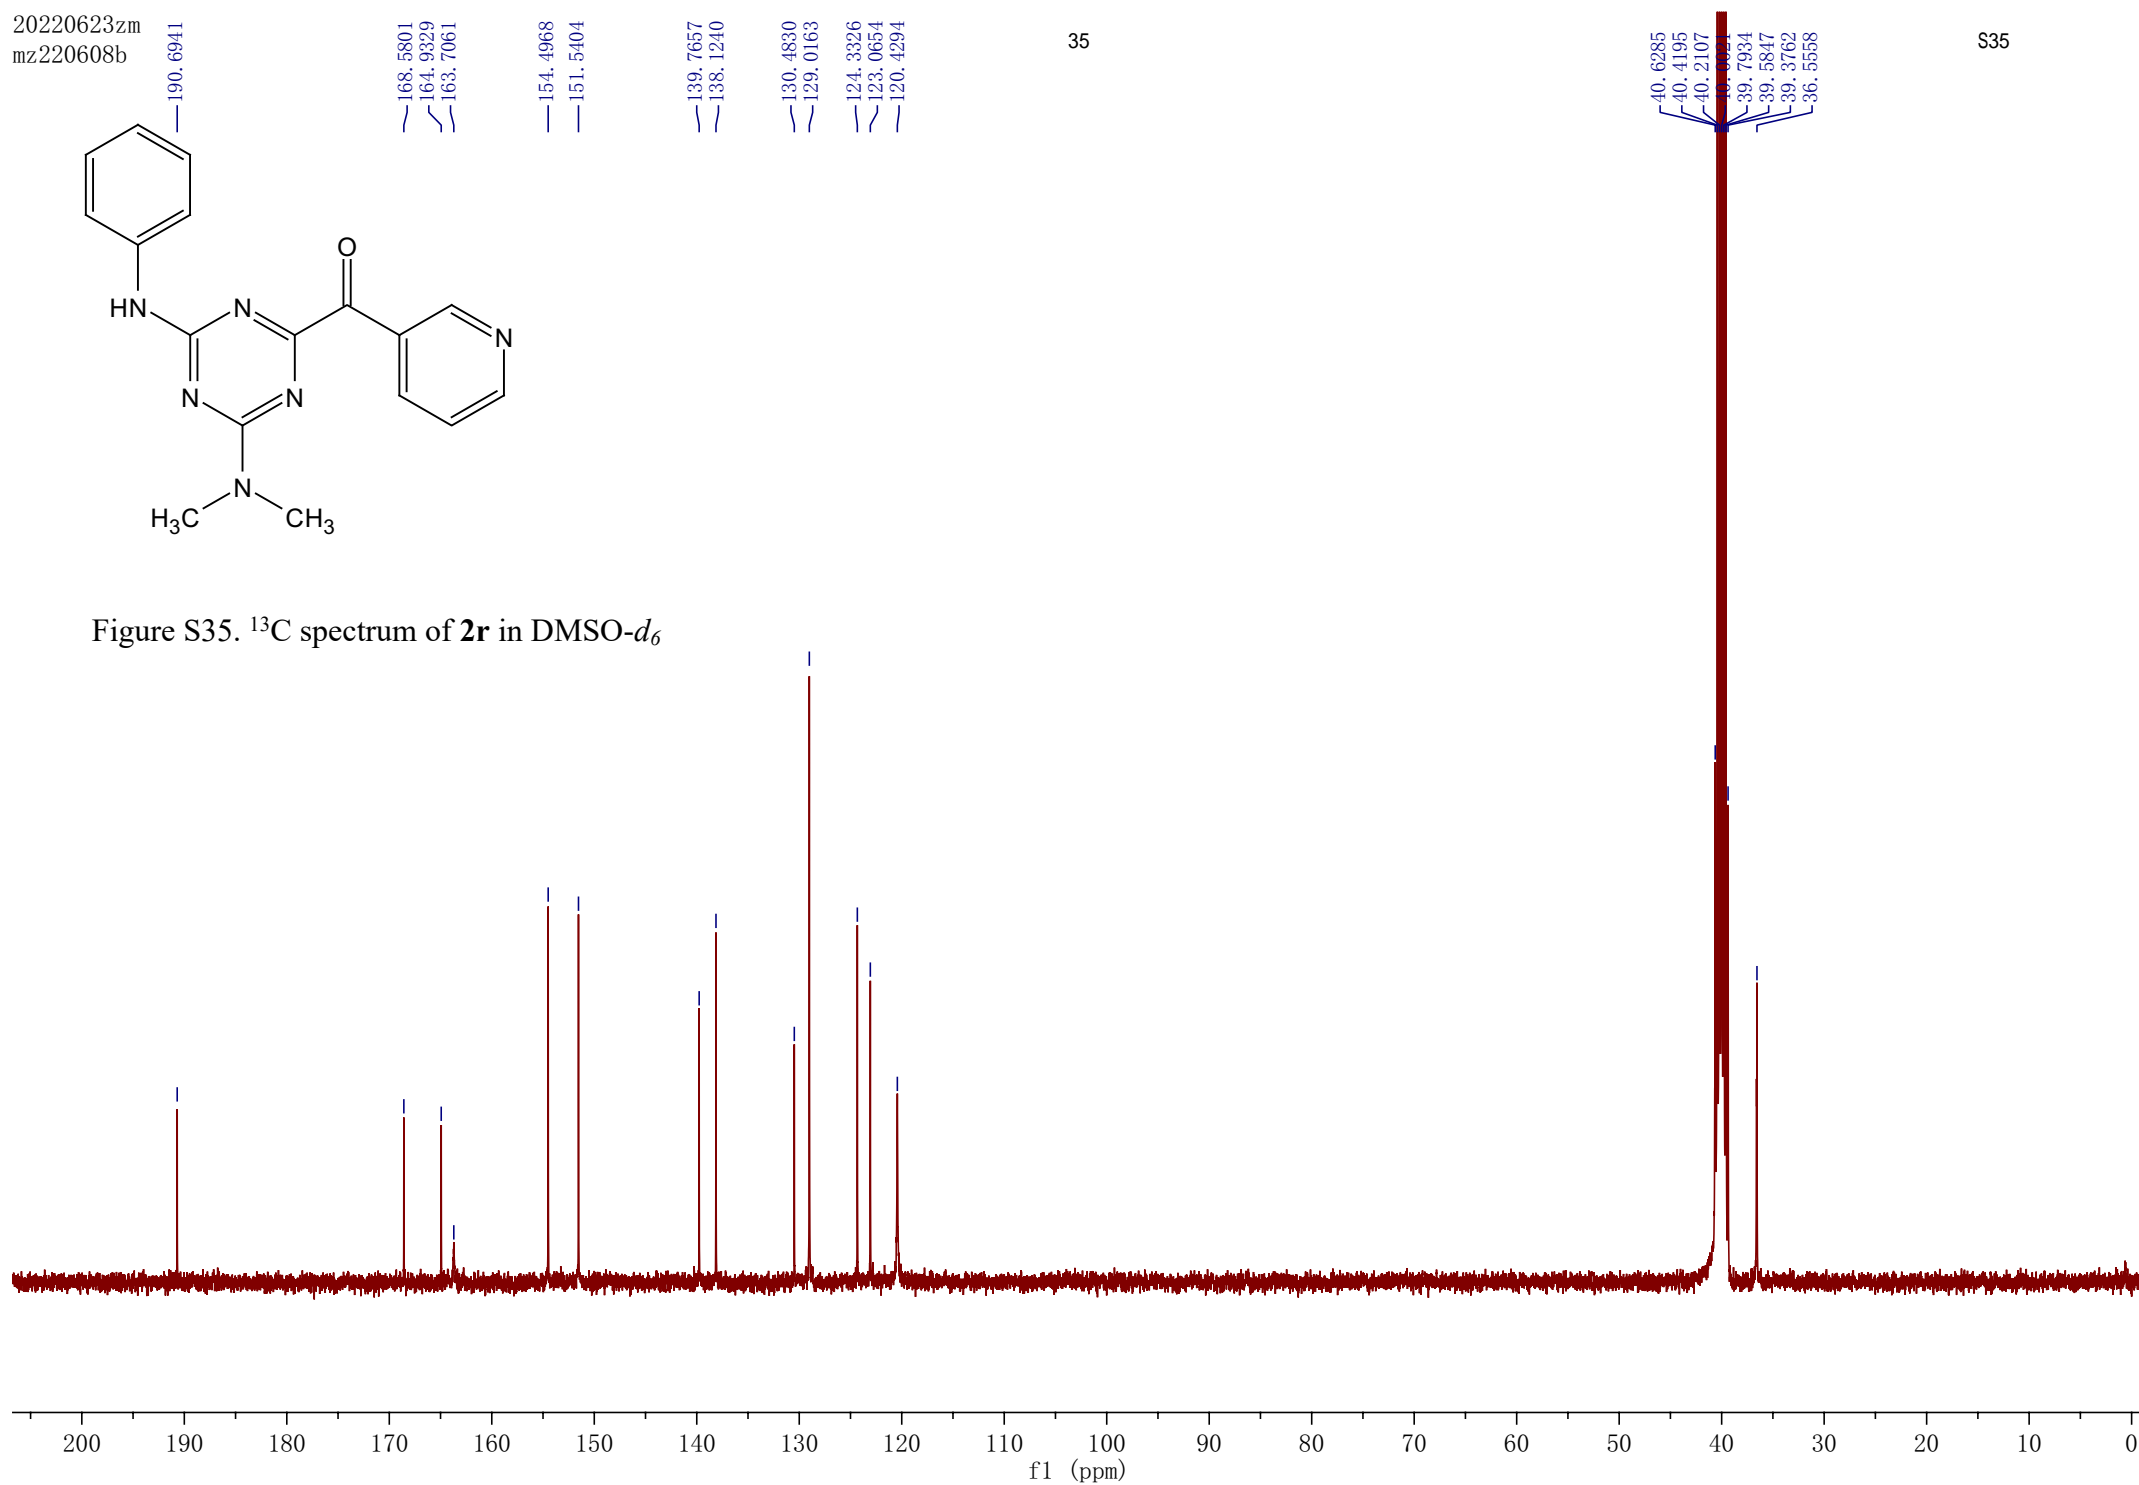

Figure S35.  $^{13}\text{C}$  spectrum of **2r** in  $\text{DMSO-}d_6$
